# Supplementary material for: Asymmetrical benzo[a]-fused N2O2-boron-chelated BODIPYs as red to near-infrared absorbing chromophores: synthesis, characteristics and device applications for opto-electronics
Source: Royal Society of Chemistry journal article supplement (doi:10.1039/d0ma00910e), 2021-01-01
Supplement: d0ma00910e1.pdf [file d0ma00910e1.pdf]

## Electric Supporting Information

### Asymmetrical benzo[a]-fused $N_2O_2$ -boron-chelated BODIPYs as red to near-infrared absorbing chromophores; synthesis, characteristic and device applications for opto-electronics

Yuji Kubo,<sup>\*a</sup> Toshiki Nozawa,<sup>a</sup> Kentaro Maeda<sup>b</sup> and Yuta Hashimoto<sup>b</sup>

<sup>a</sup>Department of Applied Chemistry, Graduate School of Urban Environmental Sciences, Tokyo Metropolitan University, 1-1 Minami-Osawa, Hachioji, Tokyo, 192-0397

<sup>b</sup>Nippon Kayaku Co., Ltd., 31-12, Shimo 3-Chome, Kita-ku, Tokyo, 115-8588

#### Table of contents

|                                                                                                               |               |
|---------------------------------------------------------------------------------------------------------------|---------------|
| Synthesis of <b>8</b> and <b>9b</b> .....                                                                     | S-2 – S-3     |
| <b>Fig. S1</b> Dihedral angles .....                                                                          | S-4           |
| <b>Fig. S2</b> A pair of the enantiomers of <b>2</b> .....                                                    | S-4           |
| <b>Fig. S3</b> Fluorescence decay profiles of <b>1</b> ~ <b>5</b> .....                                       | S-4           |
| <b>Fig. S4</b> Photophysical properties of the dyes in various solvents .....                                 | S-5 – S-6     |
| <b>Table S1.</b> Calculated values of for <b>1</b> .....                                                      | S-6           |
| <b>Fig. S5</b> The frontier molecular orbitals of the optimized structures of <b>1</b> . .....                | S-6 – S-7     |
| <b>Table S2.</b> Calculated values for <b>2</b> .....                                                         | S-7           |
| <b>Fig. S6</b> The frontier molecular orbitals of the optimized structures of <b>2</b> . .....                | S-8           |
| <b>Table S3.</b> Calculated values for <b>3</b> .....                                                         | S-8 – S-9     |
| <b>Fig. S7</b> The frontier molecular orbitals of the optimized structures of <b>3</b> .....                  | S-9           |
| <b>Table S4.</b> Calculated values for <b>4</b> .....                                                         | S-10          |
| <b>Fig. S8</b> The frontier molecular orbitals of the optimized structures of <b>4</b> . .....                | S-10 – S-11   |
| <b>Table S5.</b> Calculated values for <b>5</b> .....                                                         | S-11          |
| <b>Fig. S9</b> The frontier molecular orbitals of the optimized structures of <b>5</b> .....                  | S-11          |
| <b>Fig. S10</b> Chromatogram of the enantiomeric separation of <b>2</b> .....                                 | S-12          |
| <b>Fig. S11</b> Calculated CD spectrum of <i>P</i> -isomer of <b>2</b> .....                                  | S-12          |
| <b>Fig. S12</b> DSC (a) and TGA (b) plots of <b>2</b> .....                                                   | S-13          |
| <b>Fig. S13</b> Photoelectron spectroscopic analysis of film <b>2</b> .....                                   | S-13          |
| <b>Fig. S14 – Fig. S97</b> Spectral data of structure assignment of the dyes .....                            | S-14 – S-84   |
| Single crystal X-ray diffraction study for <b>2</b> .....                                                     | S-85 – S-108  |
| <b>Table S6.</b> Atom coordinates and absolute energy levels for <b>1</b> optimized in the $S_0$ state. ....  | S-109 – S-110 |
| <b>Table S7.</b> Atom coordinates and absolute energy levels for <b>2</b> optimized in the $S_0$ state. ....  | S-111 – S-112 |
| <b>Table S8.</b> Atom coordinates and absolute energy levels for <b>3</b> optimized in the $S_0$ state. ....  | S-113 – S-114 |
| <b>Table S9.</b> Atom coordinates and absolute energy levels for <b>4</b> optimized in the $S_0$ state. ....  | S-115 – S-116 |
| <b>Table S10.</b> Atom coordinates and absolute energy levels for <b>5</b> optimized in the $S_0$ state. .... | S-117 – S-118 |

## Synthesis

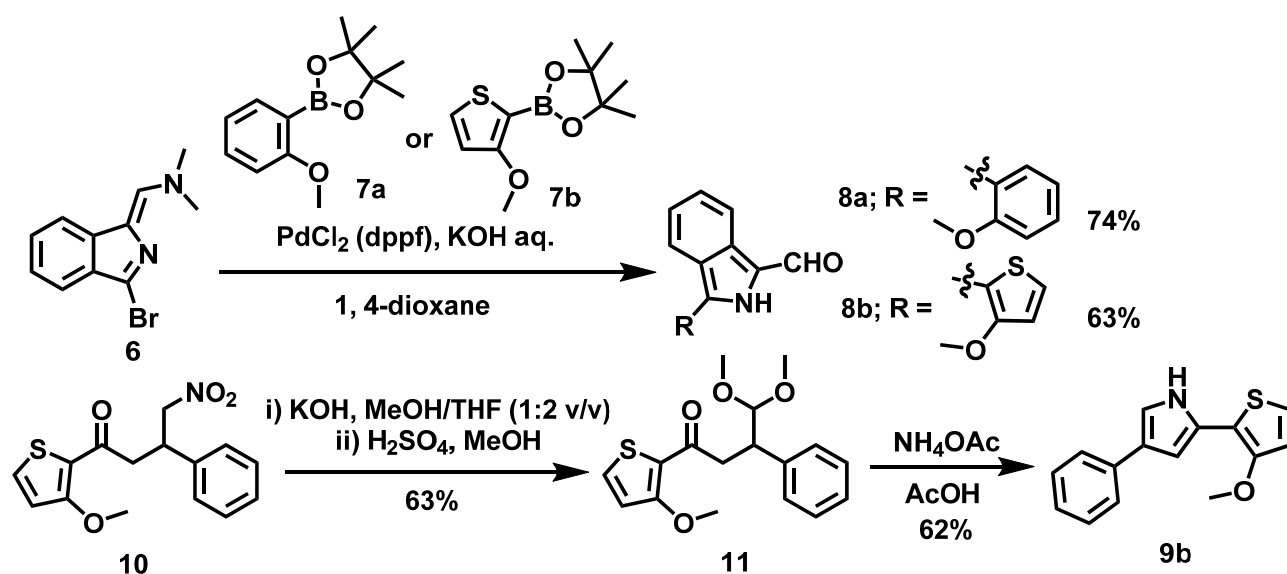

**Scheme S1.** Synthetic path of **8** and **9b**.

**3-(2-Methoxyphenyl)-1-formylisoindole (8a):** 1-(3-Bromo-1H-isoindol-1-ylidene)-*N,N*-dimethyl methanamine **6** (8.50 g, 33.9 mmol) and (2-methoxyphenyl)-4,4,5,5-tetramethyl-1,3,2-dioxaborolane (8.30 g, 35.5 mmol) were dissolved in 1,4-dioxane (500 mL) and the mixture was degassed by freeze-pump-thaw cycles 3 times. After adding PdCl<sub>2</sub> (dppf) (1.39 g, 1.70 mmol) and 4M KOH degassed by freeze-pump-thaw cycles, the resultant mixture was stirred overnight at 90 °C. After celite filtration, the reaction solution was evaporated and extracted with CHCl<sub>3</sub>. The organic phase was chromatographed on silica gel (Wakogel C-300) using EtOAc:CH<sub>2</sub>Cl<sub>2</sub> (1:1 v/v) as an eluent to afford 8.02 g of **8a** in 74% yield. <sup>1</sup>H NMR (400 MHz, CDCl<sub>3</sub>): δ (ppm) 11.26 (1H, s), 9.94 (1H, s), 8.06 (1H, d, *J* = 8.60 Hz), 8.03 – 7.99 (2H, m), 7.44 – 7.38 (2H, m), 7.27 – 7.23 (1H, m), 7.16 (1H, t, *J* = 7.54 Hz), 7.11 (1H, d, *J* = 8.36 Hz), 4.02 (3H, s). FAB-MS: *m/z* = 251 [M<sup>+</sup>] and 251 [M+1]<sup>+</sup>.

**3-(3-Methoxythiophen-2-yl)-1-formylisoindole (8b):** Compound **8b** was synthesized in a similar manner as **8a** using 1-(3-bromo-1H-isoindol-1-ylidene)-*N,N*-dimethyl methanamine **6** (0.167 g, 0.666 mmol), 4,4,5,5-Tetramethyl-2-(3-methoxy-2-thienyl)-1,3,2-dioxaborolan (0.168 g, 0.698 mmol). 0.108 g of **8b** was obtained in 63% yield. <sup>1</sup>H NMR (500MHz, CDCl<sub>3</sub>) : δ (ppm) = 11.32 (1H, s), 9.88 (1H, s), 8.09 (1H, d, *J* = 8.60 Hz), 7.98 (1H, d, *J* = 8.40 Hz), 7.40 (1H, t, *J* = 7.75 Hz), 7.38 (1H, d, *J* = 5.60 Hz), 7.27 – 7.24 (1H, m), 7.02 (1H, d, *J* = 5.45 Hz), 4.15 (s, 3H). FAB-MS: *m/z* = 257[M]<sup>+</sup>, 258[M+H]<sup>+</sup>.

**4,4-Dimethoxy-1-(3-methoxythiophen-2-yl)-3-phenylbutan-1-one (11)** To a solution of 1-(3-methoxythiophen-2-yl)-4-nitro-3-phenylbutan-1-one (4.95 g, 17.0 mmol) in MeOH (172mL) /THF (344 mL) was added KOH (4.84 g, 86.2 mmol) at room temperature and the resultant solution was stirred for 1 h. After adding 36N H<sub>2</sub>SO<sub>4</sub> (32 mL) in MeOH (172 mL) under an icy condition, the mixture was then stirred for 1 h at room temperature. The resultant solution was poured into iced water, neutralized with 4N NaOH aqueous solution, evaporated by half, and then

extracted with CH<sub>2</sub>Cl<sub>2</sub>. The organic layer was washed with water, dried with Na<sub>2</sub>SO<sub>4</sub> and evaporated. The residue was then chromatographed on silica gel (Wakogel C300) using CH<sub>2</sub>Cl<sub>2</sub> as an eluent to afford 3.44g of **11** in 63% yield. <sup>1</sup>H NMR (400 MHz, CDCl<sub>3</sub>): δ (ppm) 7.45 (1H, d, *J* = 5.60 Hz), 7.32 (2H, dt, *J* = 8.25 and 1.57 Hz), 7.28 – 7.25 (2H, m), 7.17 (1H, tt, *J* = 7.11 and 1.67 Hz), 6.82 (1H, d, *J* = 5.52 Hz), 4.53 (1H, d, *J* = 6.20 Hz), 3.74 (1H, dt, *J* = 5.84 and 5.81 Hz), 3.42–3.31 (2H, m), 3.36 (s, 3H), 3.29 (s, 3H). FABMS: *m/z* = 289 [M-OMe]<sup>+</sup>.

**2-(3-Methoxythiophen-2-yl)-4-phenyl-1H-pyrrole (9b)** The mixture of **11** (0.564 g, 1.76 mmol), NH<sub>4</sub>OAc (0.686 g, 8.90 mmol) and AcOH (25 mL) was heated at 100°C for 1 h. After adding icy water, the solution was neutralized with 4M NaOH aq., extracted with CH<sub>2</sub>Cl<sub>2</sub> and washed with water. The residue was chromatographed on silica gel (Wakogel C-300) using CH<sub>2</sub>Cl<sub>2</sub> as an eluent (AcOEt/Hexane = 1/4 v/v) to afford **9b** in 65% yield. <sup>1</sup>H NMR (500 MHz, CDCl<sub>3</sub>): δ (ppm) 9.39 (1H, s), 7.55 (2H, dd, *J* = 8.35 and 1.18 Hz), 7.33 (2H, tt, *J* = 7.73 and 1.58 Hz), 7.17 (1H, tt, *J* = 7.35 and 1.23 Hz), 7.08 (1H, dd, *J* = 2.56 and 1.78 Hz), 7.00 (1H, d, *J* = 5.44 Hz), 6.86 (1H, d, *J* = 5.44 Hz), 6.59 (1H, dd, *J* = 2.64 and 1.70 Hz), 3.98 (3H, s). FAB-MS: *m/z* = 255 [M]<sup>+</sup>.

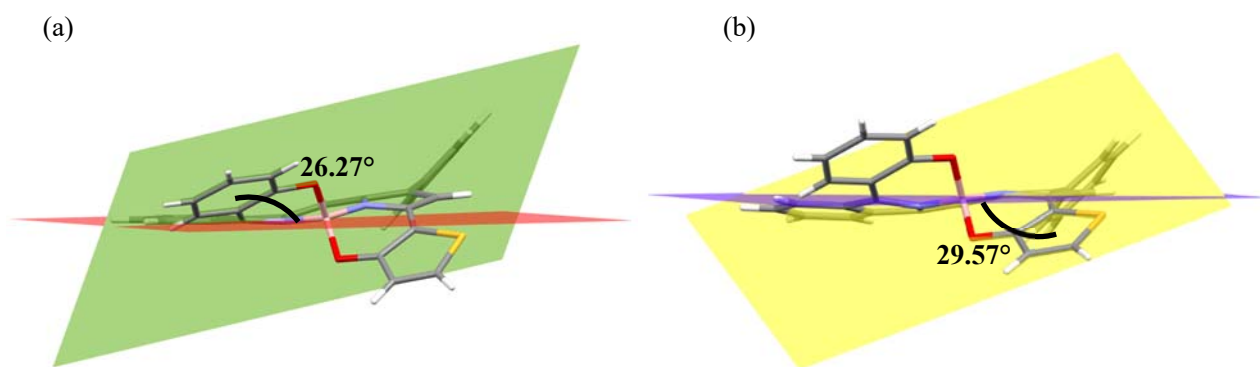

**Fig. S1** Dihedral angles of 3-benzo[1,3,2]oxazaborinine (a) and 3-thieno[1,3,2]oxazaborinine units (b)

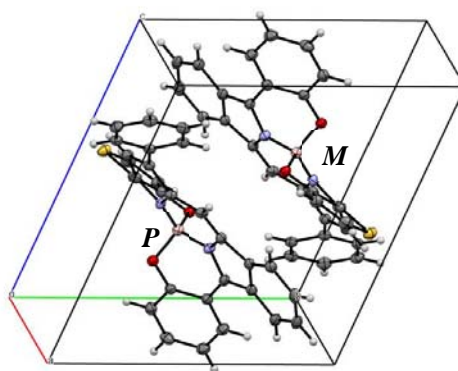

**Fig. S2** A pair of the enantiomers of 2.

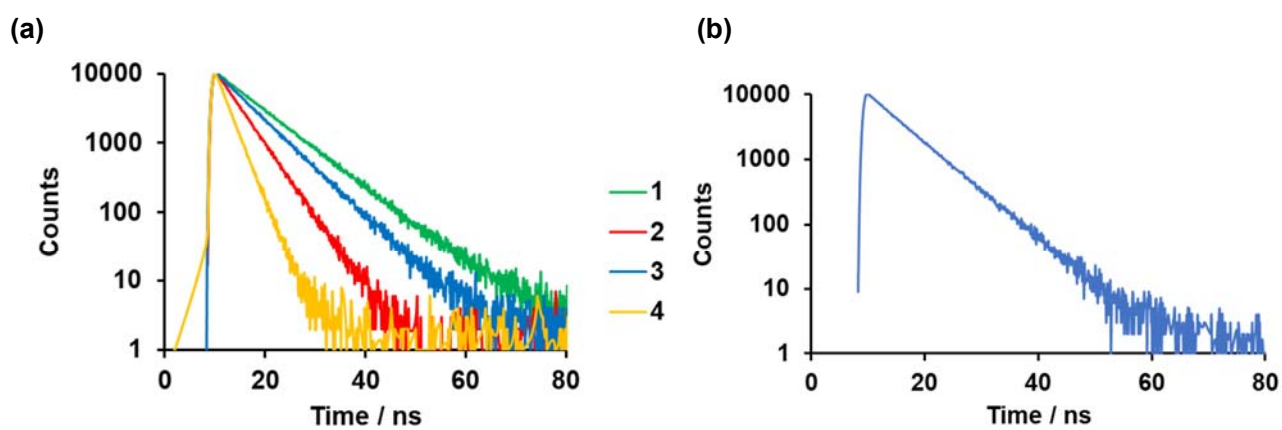

**Fig. S3** (a) Fluorescence decay profiles of 1~4 (10  $\mu$ M) in THF at 25.0°C. Excited with LED light at 630 nm. (b) Fluorescence decay profiles of 5 (10  $\mu$ M) in THF at 25.0°C, which was monitored at 625 nm. Excited with LED light at 590 nm.

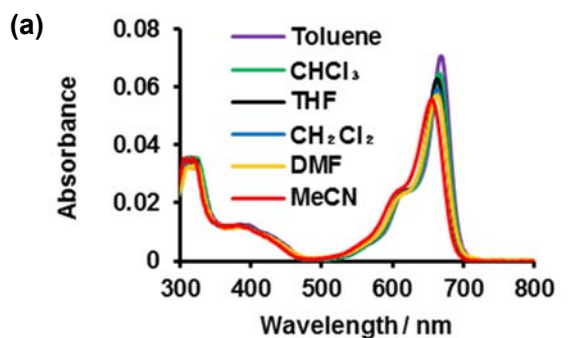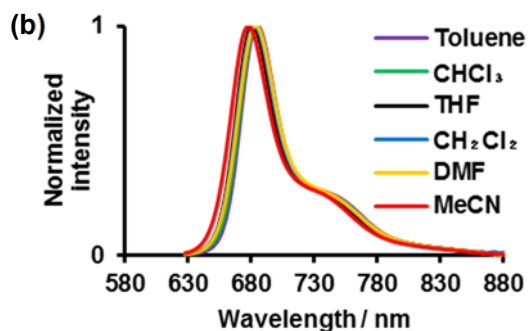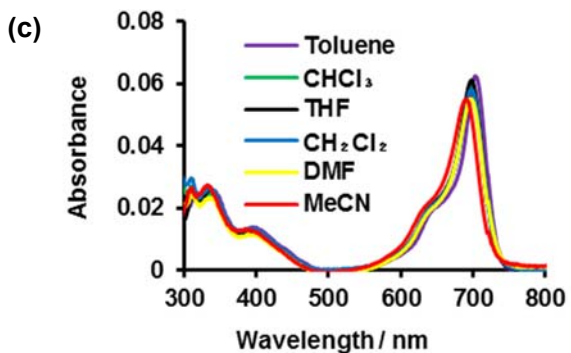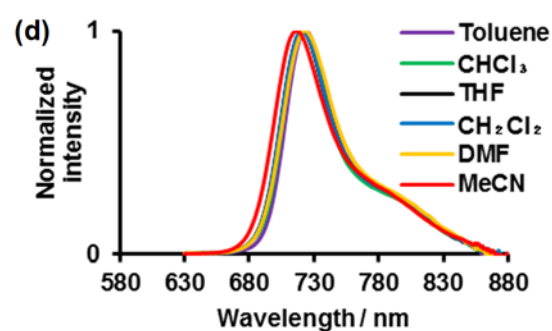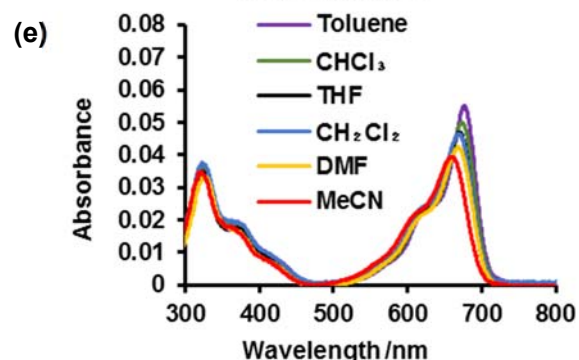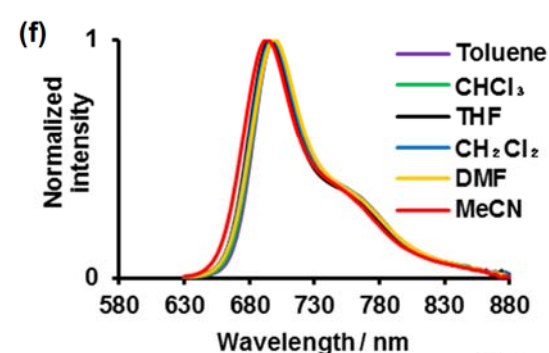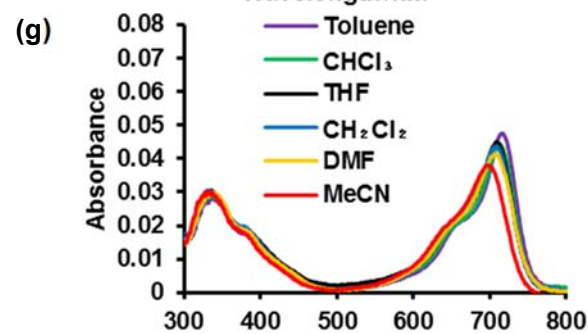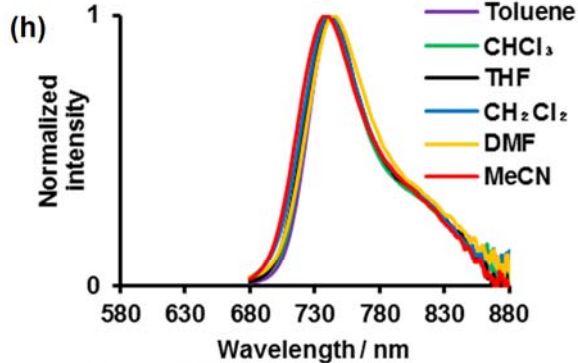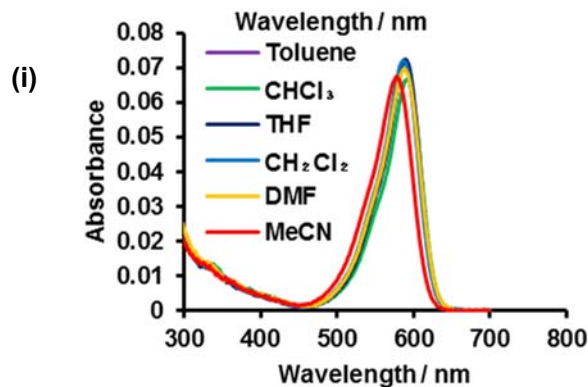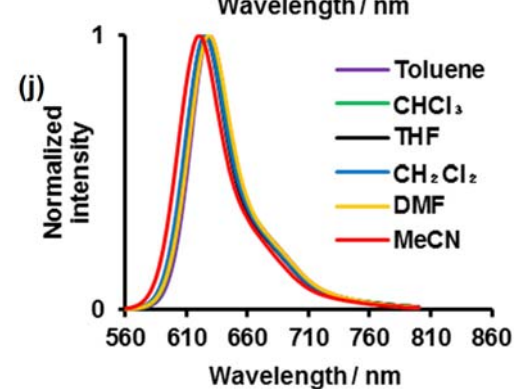

**Fig. S4** Photophysical properties of the dyes (1  $\mu\text{M}$ ) in various solvents; absorption of **1** (a), fluorescence of **1** (b), absorption of **2** (c), fluorescence of **2** (d), absorption of **3** (e), fluorescence of **3** (f), absorption of **4** (g), fluorescence of **4** (h), absorption of **5** (i) and fluorescence of **5** (j).

**Table S1.** Calculated values of excited wavelength ( $\lambda_{\text{calcd}}$ ), oscillator strength ( $f$ ) and molecular orbital (MO) transition assignment for selected transition energies for **1**. The reported transitions have oscillator strength ( $f$ ) more than 0.1.

| Dye                            | State                 | $\lambda(\text{calcd.}) / \text{nm}$ | $f / \text{a.u.}$ | MO transition assignment <sup>a</sup> |
|--------------------------------|-----------------------|--------------------------------------|-------------------|---------------------------------------|
| <b>1</b>                       | $S_0 \rightarrow S_1$ | 534                                  | 0.5030            | HOMO $\rightarrow$ LUMO (97%)         |
|                                | $S_0 \rightarrow S_2$ | 360                                  | 0.1216            | HOMO-2 $\rightarrow$ LUMO (7%)        |
|                                |                       |                                      |                   | HOMO-1 $\rightarrow$ LUMO (87%)       |
|                                | $S_0 \rightarrow S_5$ | 309                                  | 0.1639            | HOMO-6 $\rightarrow$ LUMO (7%)        |
|                                |                       |                                      |                   | HOMO $\rightarrow$ LUMO+1 (87%)       |
|                                | $S_0 \rightarrow S_7$ | 280                                  | 0.1835            | HOMO-6 $\rightarrow$ LUMO (6%)        |
|                                |                       |                                      |                   | HOMO-4 $\rightarrow$ LUMO (76%)       |
|                                |                       |                                      |                   | HOMO-3 $\rightarrow$ LUMO (4%)        |
|                                | $S_0 \rightarrow S_8$ | 266                                  | 0.1568            | HOMO-8 $\rightarrow$ LUMO (3%)        |
|                                |                       |                                      |                   | HOMO-7 $\rightarrow$ LUMO (83%)       |
|                                | $S_0 \rightarrow S_9$ | 262                                  | 0.3642            | HOMO-1 $\rightarrow$ LUMO+1 (3%)      |
|                                |                       |                                      |                   | HOMO-1 $\rightarrow$ LUMO+2 (3%)      |
|                                |                       |                                      |                   | HOMO $\rightarrow$ LUMO+2 (70%)       |
|                                |                       |                                      |                   | HOMO $\rightarrow$ LUMO+3 (3%)        |
| HOMO $\rightarrow$ LUMO+5 (4%) |                       |                                      |                   |                                       |

<sup>a</sup>Data given in parentheses are  $2 \times (\text{CI coefficient})^2 \times 100\%$ ; see the reference: M. Asgari, H. R. Memarian and H. Sabzyan, *J. Mol. Struct.*, 2020, **1207**, 127820.

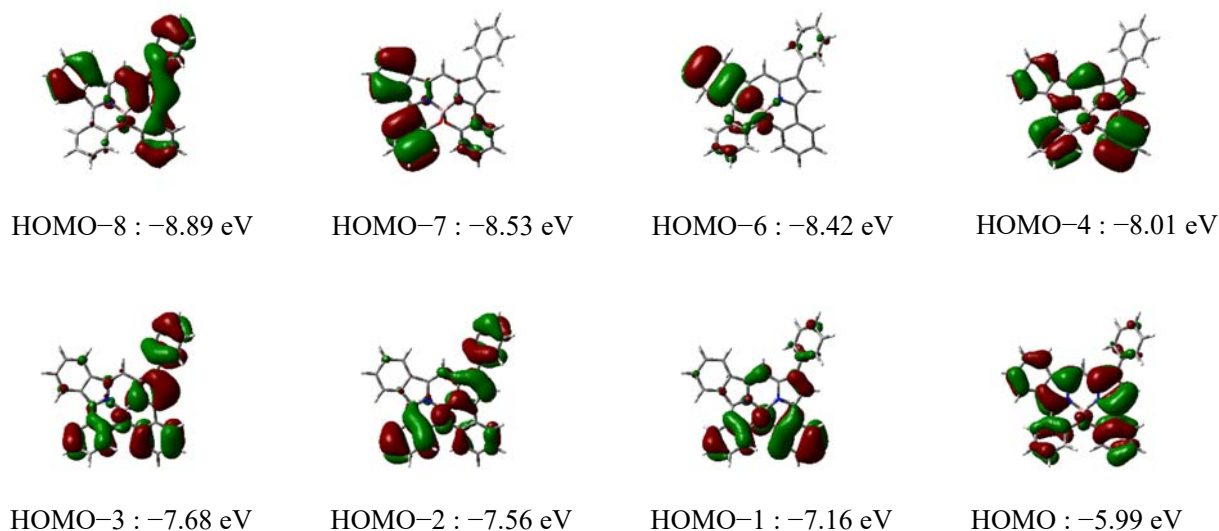

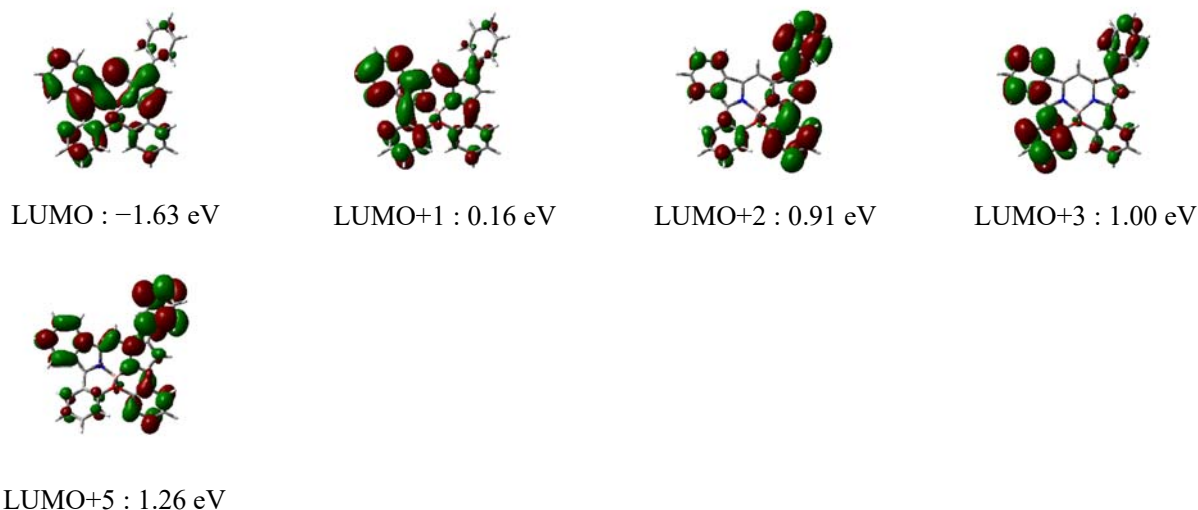

**Fig. S5** The frontier molecular orbitals of the optimized structures of **1**.

**Table S2.** Calculated values of excited wavelength ( $\lambda_{\text{calcd}}$ ), oscillator strength ( $f$ ) and molecular orbital (MO) transition assignment for selected transition energies for **2**. The reported transitions have oscillator strength ( $f$ ) more than 0.1.

| Dye      | State                 | $\lambda(\text{calcd.}) / \text{nm}$ | $f / \text{a.u.}$ | MO transition assignment <sup>a</sup>                                                                                                   |
|----------|-----------------------|--------------------------------------|-------------------|-----------------------------------------------------------------------------------------------------------------------------------------|
| <b>2</b> | $S_0 \rightarrow S_1$ | 558                                  | 0.4753            | HOMO $\rightarrow$ LUMO (98%)                                                                                                           |
|          | $S_0 \rightarrow S_2$ | 357                                  | 0.1109            | HOMO-2 $\rightarrow$ LUMO (5%)<br>HOMO-1 $\rightarrow$ LUMO (87%)<br>HOMO $\rightarrow$ LUMO+1 (3%)                                     |
|          | $S_0 \rightarrow S_4$ | 320                                  | 0.2329            | HOMO-5 $\rightarrow$ LUMO (3%)<br>HOMO-3 $\rightarrow$ LUMO (9%)<br>HOMO-2 $\rightarrow$ LUMO (13%)<br>HOMO $\rightarrow$ LUMO+1 (70%)  |
|          | $S_0 \rightarrow S_5$ | 314                                  | 0.1228            | HOMO-3 $\rightarrow$ LUMO (37%)<br>HOMO-2 $\rightarrow$ LUMO (33%)<br>HOMO-1 $\rightarrow$ LUMO (4%)<br>HOMO $\rightarrow$ LUMO+1 (19%) |
|          | $S_0 \rightarrow S_8$ | 276                                  | 0.3838            | HOMO-4 $\rightarrow$ LUMO (13%)<br>HOMO $\rightarrow$ LUMO+2 (77%)                                                                      |
|          | $S_0 \rightarrow S_9$ | 265                                  | 0.1226            | HOMO-8 $\rightarrow$ LUMO (2%)<br>HOMO-7 $\rightarrow$ LUMO (81%)<br>HOMO $\rightarrow$ LUMO+3 (3%)                                     |

<sup>a</sup>Data given in parentheses are  $2 \times (\text{CI coefficient})^2 \times 100\%$ ; see the reference: M. Asgari, H. R. Memarian and H. Sabzyan, *J. Mol. Struct.*, 2020, **1207**, 127820.

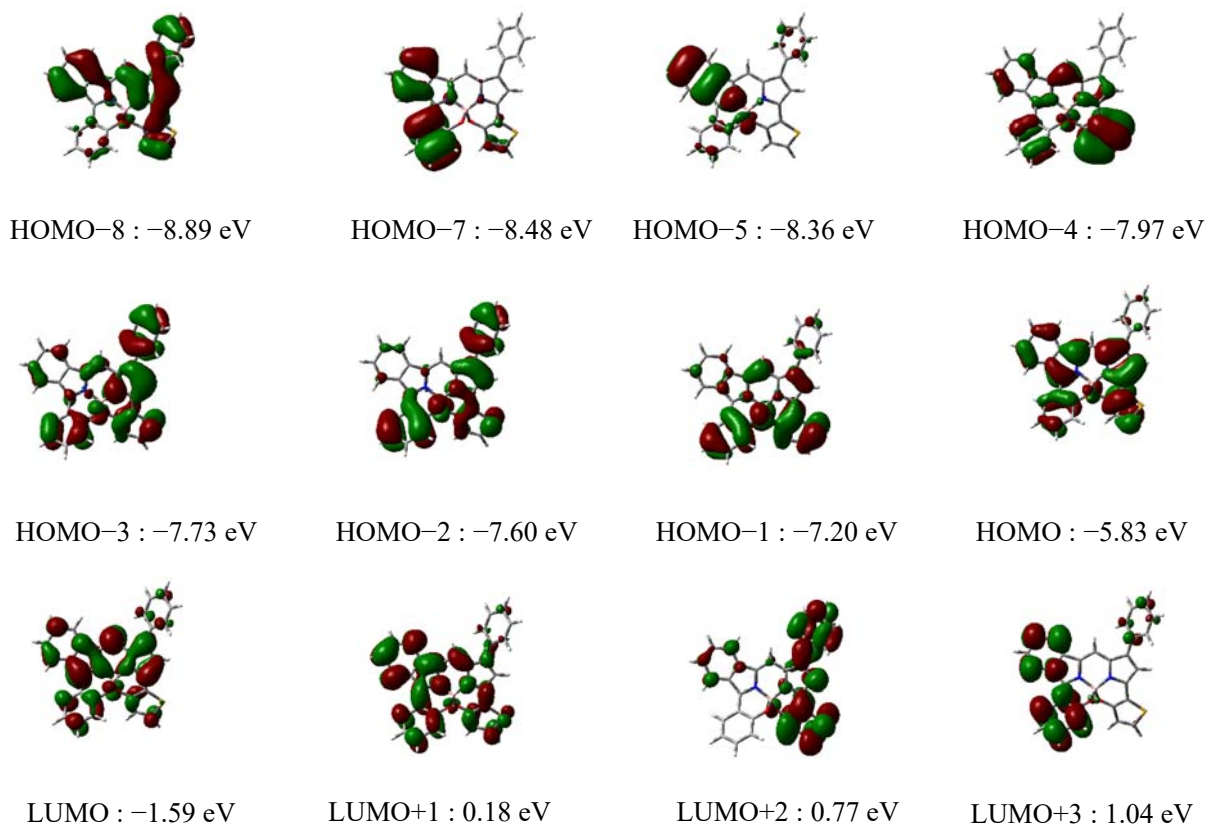

**Fig. S6** The frontier molecular orbitals of the optimized structures of **2**.

**Table S3.** Calculated values of excited wavelength ( $\lambda_{\text{calcd}}$ ), oscillator strength ( $f$ ) and molecular orbital (MO) transition assignment for selected transition energies for **3**. The reported transitions have oscillator strength ( $f$ ) more than 0.1.

| Dye      | State                 | $\lambda(\text{calcd.}) / \text{nm}$ | $f / \text{a.u.}$ | MO transition assignment <sup>a</sup>                                                                                                 |
|----------|-----------------------|--------------------------------------|-------------------|---------------------------------------------------------------------------------------------------------------------------------------|
| <b>3</b> | $S_0 \rightarrow S_1$ | 540                                  | 0.4609            | HOMO $\rightarrow$ LUMO (97%)                                                                                                         |
|          | $S_0 \rightarrow S_2$ | 352                                  | 0.1108            | HOMO-3 $\rightarrow$ LUMO (5%)<br>HOMO-2 $\rightarrow$ LUMO (3%)<br>HOMO-1 $\rightarrow$ LUMO (85%)<br>HOMO $\rightarrow$ LUMO+1 (3%) |
|          | $S_0 \rightarrow S_4$ | 319                                  | 0.2678            | HOMO-2 $\rightarrow$ LUMO (2%)<br>HOMO-1 $\rightarrow$ LUMO (2%)<br>HOMO $\rightarrow$ LUMO+1 (89%)                                   |
|          | $S_0 \rightarrow S_6$ | 283                                  | 0.1111            | HOMO-7 $\rightarrow$ LUMO (5%)<br>HOMO-6 $\rightarrow$ LUMO (69%)<br>HOMO-4 $\rightarrow$ LUMO (17%)                                  |
|          | $S_0 \rightarrow S_8$ | 269                                  | 0.3232            | HOMO-7 $\rightarrow$ LUMO (45%)<br>HOMO-6 $\rightarrow$ LUMO+1 (3%)                                                                   |



$S_0 \rightarrow S_9$       264      0.2639

HOMO-4  $\rightarrow$  LUMO (4%)  
HOMO  $\rightarrow$  LUMO+2 (35%)  
HOMO  $\rightarrow$  LUMO+3 (3%)  
HOMO-7  $\rightarrow$  LUMO (19%)  
HOMO-4  $\rightarrow$  LUMO (3%)  
HOMO-3  $\rightarrow$  LUMO (3%)  
HOMO  $\rightarrow$  LUMO+2 (4%)  
HOMO  $\rightarrow$  LUMO+3 (54%)

<sup>a</sup>Data given in parentheses are  $2 \times (\text{CI coefficient})^2 \times 100\%$ ; see the reference: M. Asgari, H. R. Memarian and H. Sabzyan, *J. Mol. Struct.*, 2020, **1207**, 127820.

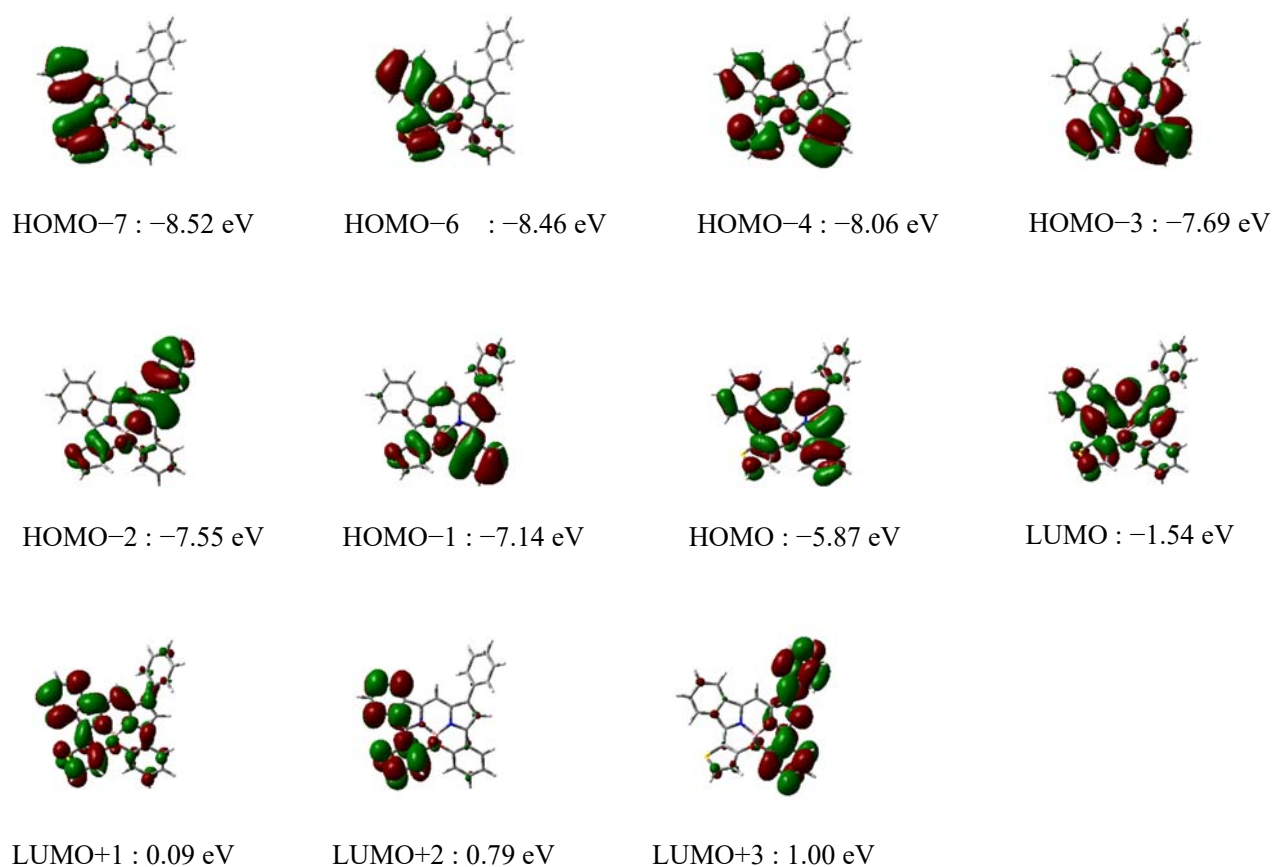

**Fig. S7** The frontier molecular orbitals of the optimized structures of **3**.

**Table S4.** Calculated values of excited wavelength ( $\lambda_{\text{calcd}}$ ), oscillator strength ( $f$ ) and molecular orbital (MO) transition assignment for selected transition energies for **4**. The reported transitions have oscillator strength ( $f$ ) more than 0.1.

| Dye                             | State                 | $\lambda(\text{calcd.}) / \text{nm}$ | $f / \text{a.u.}$               | MO transition assignment <sup>a</sup> |
|---------------------------------|-----------------------|--------------------------------------|---------------------------------|---------------------------------------|
| <b>4</b>                        | $S_0 \rightarrow S_1$ | 567                                  | 0.4368                          | HOMO $\rightarrow$ LUMO (98%)         |
|                                 |                       |                                      |                                 | HOMO-1 $\rightarrow$ LUMO (12%)       |
|                                 | $S_0 \rightarrow S_3$ | 354                                  | 0.3575                          | HOMO $\rightarrow$ LUMO+1 (81%)       |
|                                 |                       |                                      |                                 | HOMO-6 $\rightarrow$ LUMO (4%)        |
|                                 |                       |                                      |                                 | HOMO-4 $\rightarrow$ LUMO (17%)       |
|                                 | $S_0 \rightarrow S_5$ | 322                                  | 0.1140                          | HOMO-3 $\rightarrow$ LUMO (70%)       |
|                                 |                       |                                      |                                 | HOMO-2 $\rightarrow$ LUMO (2%)        |
|                                 |                       |                                      |                                 | HOMO-1 $\rightarrow$ LUMO (3%)        |
|                                 |                       |                                      |                                 | HOMO-6 $\rightarrow$ LUMO (17%)       |
|                                 |                       |                                      |                                 | HOMO $\rightarrow$ LUMO+2 (64%)       |
|                                 | $S_0 \rightarrow S_7$ | 280                                  | 0.1885                          | HOMO $\rightarrow$ LUMO+3 (7%)        |
|                                 |                       |                                      |                                 | HOMO-4 $\rightarrow$ LUMO (49%)       |
| HOMO-3 $\rightarrow$ LUMO (17%) |                       |                                      |                                 |                                       |
| $S_0 \rightarrow S_8$           | 276                   | 0.2701                               | HOMO $\rightarrow$ LUMO+3 (21%) |                                       |
|                                 |                       |                                      | HOMO-7 $\rightarrow$ LUMO (23%) |                                       |
|                                 |                       |                                      | HOMO-4 $\rightarrow$ LUMO (8%)  |                                       |
|                                 |                       |                                      | HOMO $\rightarrow$ LUMO+2 (13%) |                                       |
| $S_0 \rightarrow S_9$           | 271                   | 0.1221                               | HOMO $\rightarrow$ LUMO+3 (45%) |                                       |

<sup>a</sup>Data given in parentheses are  $2 \times (\text{CI coefficient})^2 \times 100\%$ ; see the reference: M. Asgari, H. R. Memarian and H. Sabzyan, *J. Mol. Struct.*, 2020, **1207**, 127820.

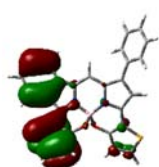

HOMO-7 : -8.48 eV

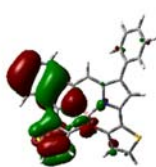

HOMO-6 : -8.42 eV

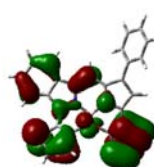

HOMO-4 : -7.98 eV

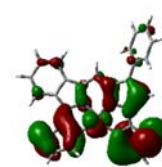

HOMO-3 : -7.77 eV

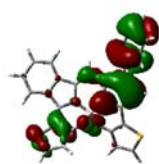

HOMO-2 : -7.59 eV

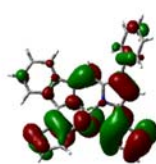

HOMO-1 : -7.16 eV

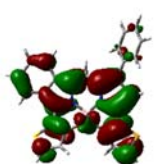

HOMO : -5.72 eV

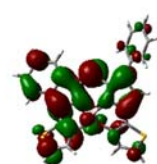

LUMO : -1.52 eV

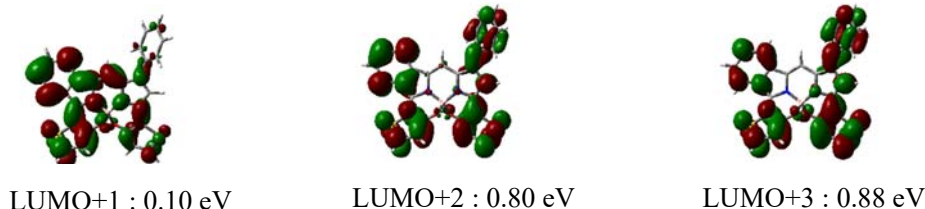

**Fig. S8** The frontier molecular orbitals of the optimized structures of **4**.

**Table S5.** Calculated values of excited wavelength ( $\lambda_{\text{calcd}}$ ), oscillator strength ( $f$ ) and molecular orbital (MO) transition assignment for selected transition energies for **5**. The reported transitions have oscillator strength ( $f$ ) more than 0.1.

| Dye      | State                 | $\lambda(\text{calcd.}) / \text{nm}$ | $f / \text{a.u.}$ | MO transition assignment <sup>a</sup>                                                                                                 |
|----------|-----------------------|--------------------------------------|-------------------|---------------------------------------------------------------------------------------------------------------------------------------|
| <b>5</b> | $S_0 \rightarrow S_1$ | 482                                  | 0.8209            | HOMO $\rightarrow$ LUMO (98%)                                                                                                         |
|          | $S_0 \rightarrow S_2$ | 332                                  | 0.1025            | HOMO-9 $\rightarrow$ LUMO (2%)<br>HOMO-5 $\rightarrow$ LUMO (2%)<br>HOMO-2 $\rightarrow$ LUMO (5%)<br>HOMO-1 $\rightarrow$ LUMO (86%) |
|          | $S_0 \rightarrow S_4$ | 283                                  | 0.3431            | HOMO-2 $\rightarrow$ LUMO (63%)<br>HOMO-1 $\rightarrow$ LUMO (4%)<br>HOMO $\rightarrow$ LUMO+1 (20%)                                  |
|          | $S_0 \rightarrow S_5$ | 282                                  | 0.1173            | HOMO-5 $\rightarrow$ LUMO (27%)<br>HOMO-2 $\rightarrow$ LUMO (19%)<br>HOMO $\rightarrow$ LUMO+1 (45%)                                 |

<sup>a</sup>Data given in parentheses are  $2 \times (\text{CI coefficient})^2 \times 100\%$ ; see the reference: M. Asgari, H. R. Memarian and H. Sabzyan, *J. Mol. Struct.*, 2020, **1207**, 127820.

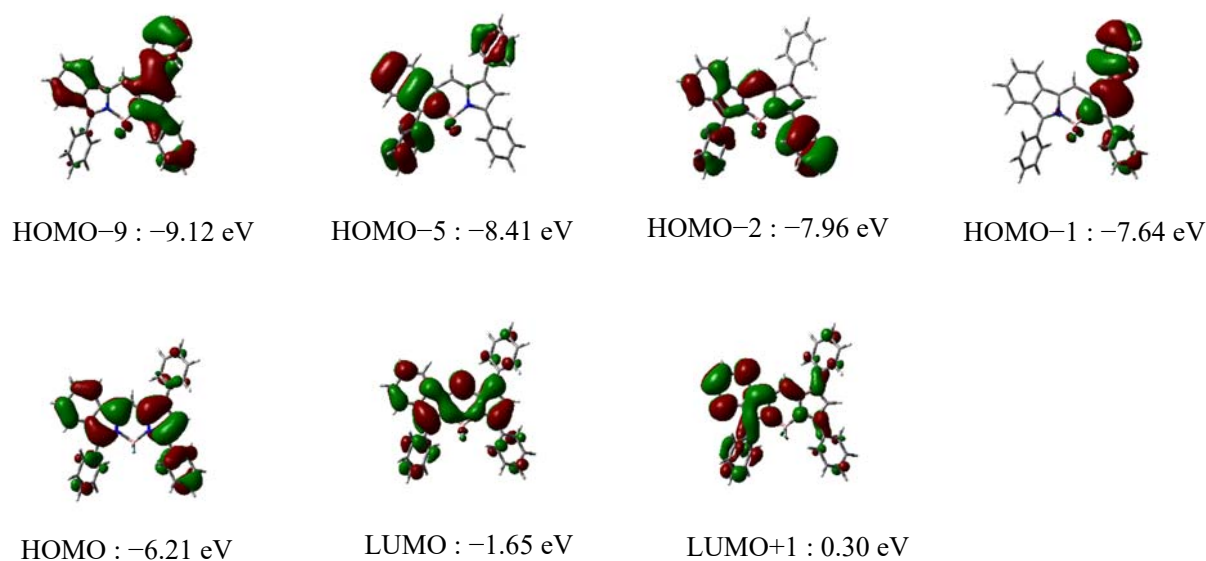

**Fig. S9** The frontier molecular orbitals of the optimized structures of **5**.

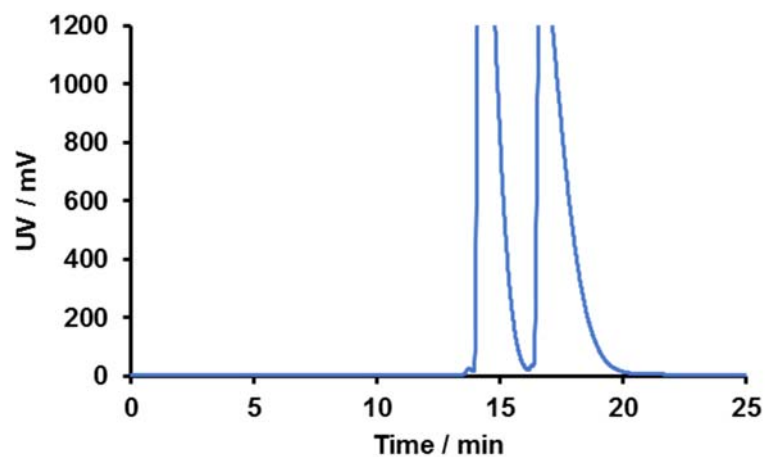

**Fig. S10** Chromatogram of the enantiomeric separation of **2**. CHIRALPACK-IE was used, where the flow rate and solvent were  $1.9 \text{ mL min}^{-1}$  and  $\text{CH}_2\text{Cl}_2$ :hexane (2:1 v/v), respectively.

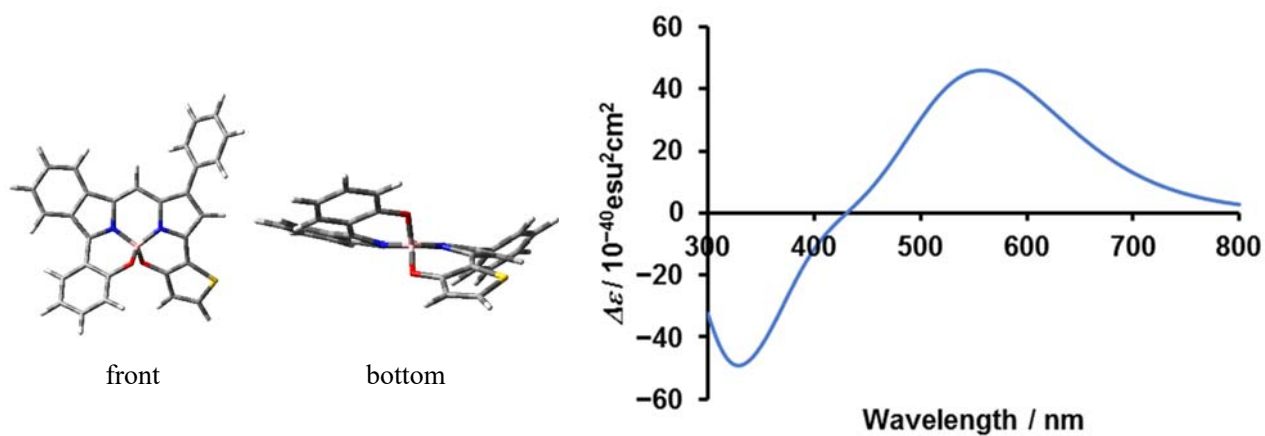

**Fig. S11** Calculated CD spectrum of *P*-isomer of **2**, being conducted by DFT and TDDFT method at CAM-B3LYP/6-31G(d,p).

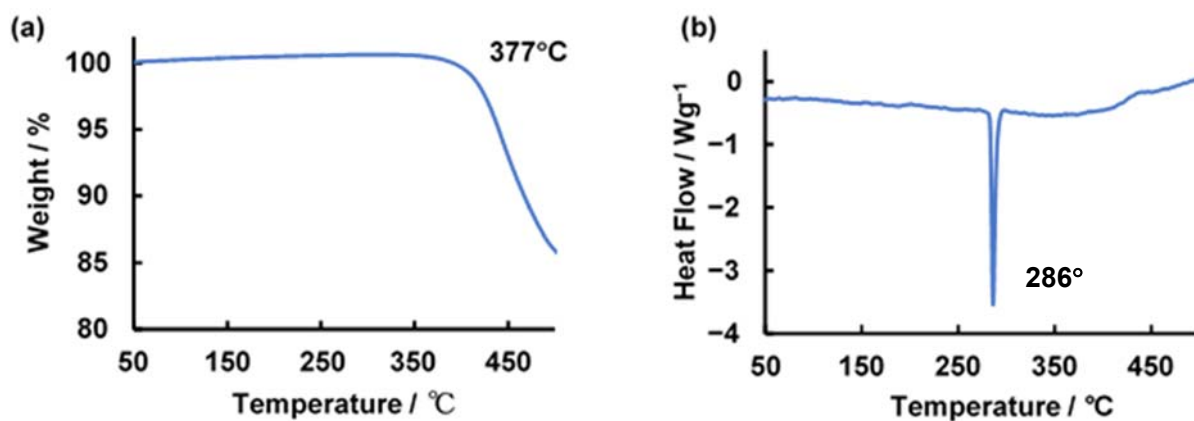

Fig. S12 DSC (a) and TGA (b) plots of 2.

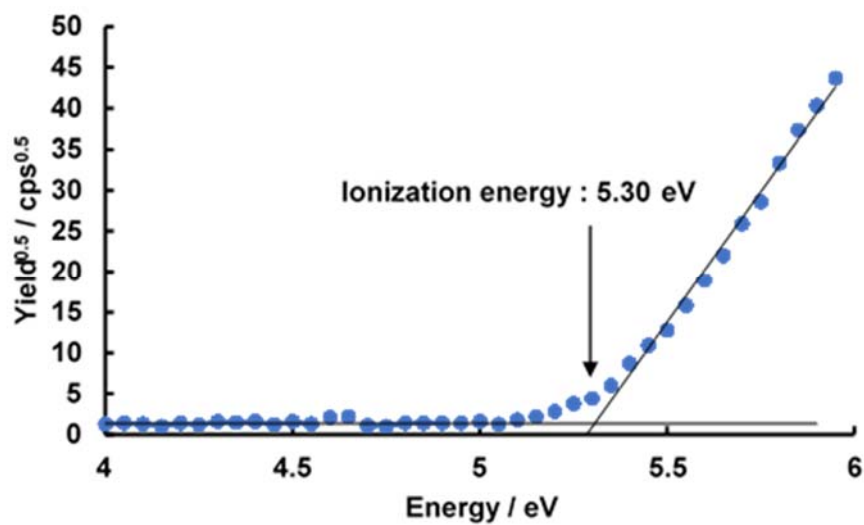

Fig. S13 Photoelectron spectroscopic analysis of film 2.

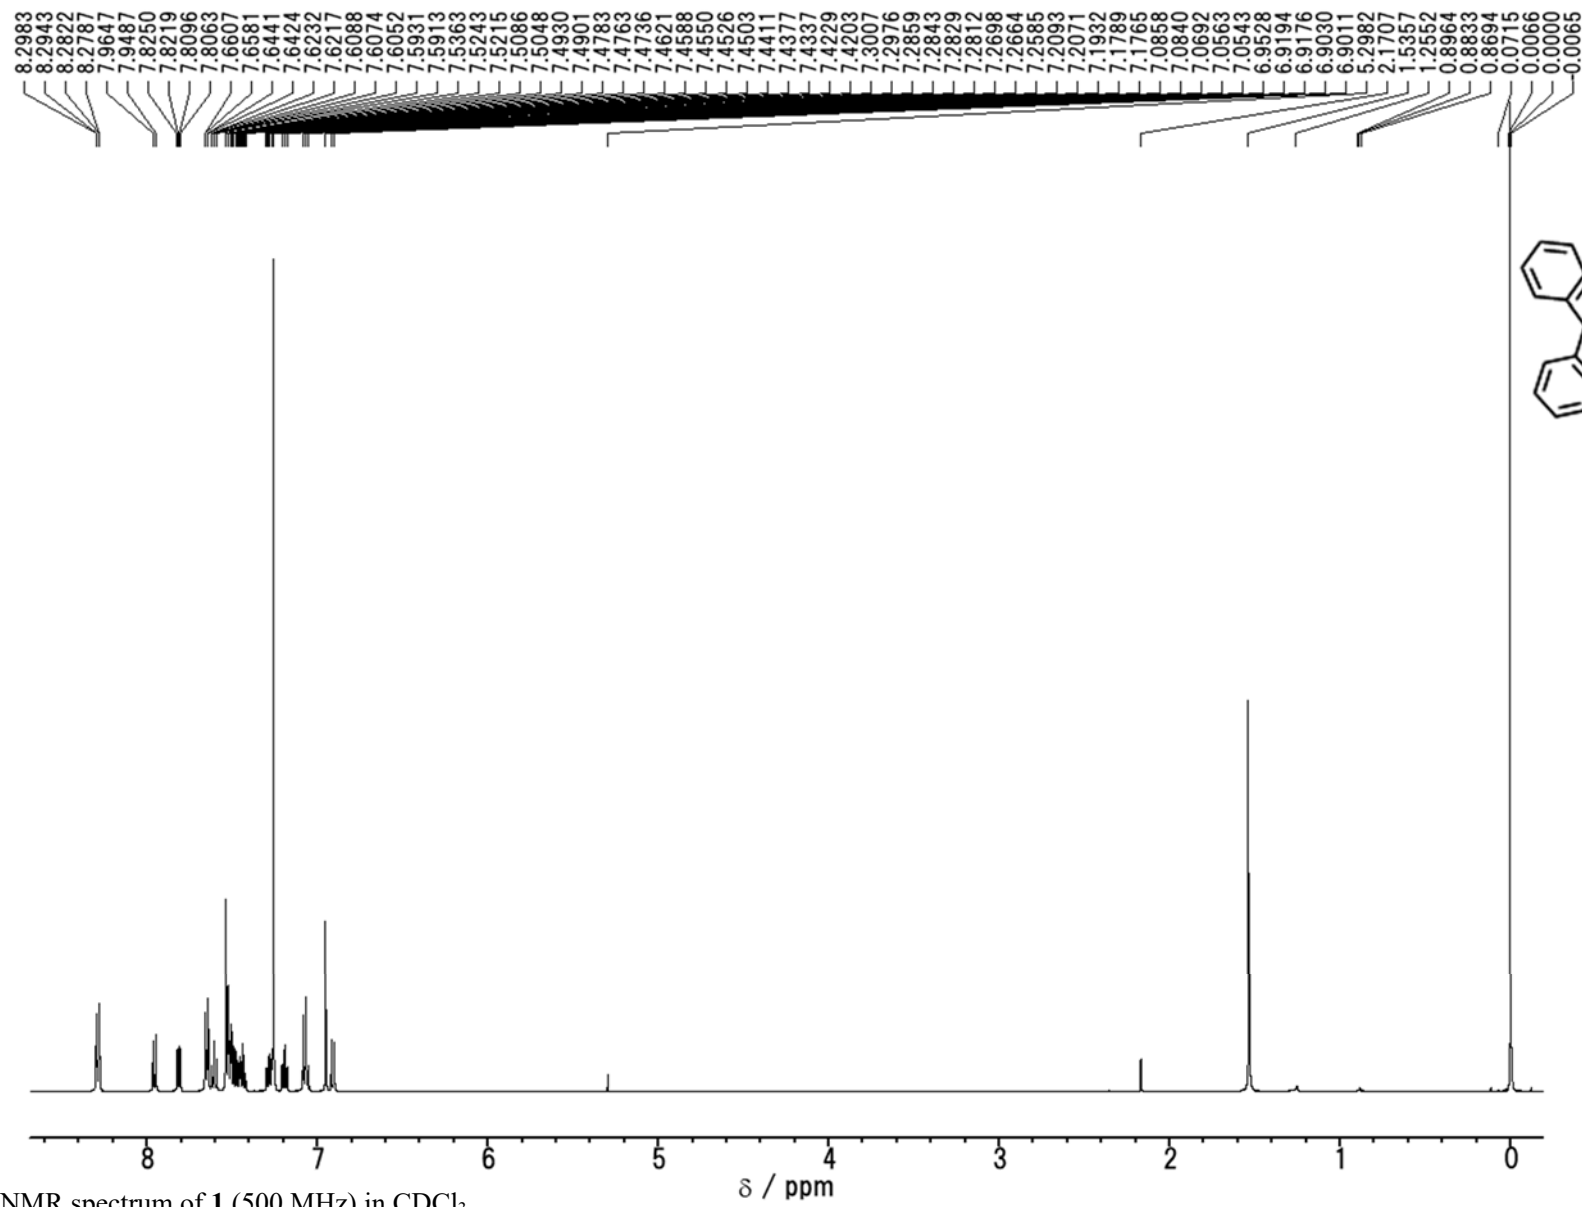

Fig. S14  $^1\text{H}$  NMR spectrum of **1** (500 MHz) in  $\text{CDCl}_3$ .

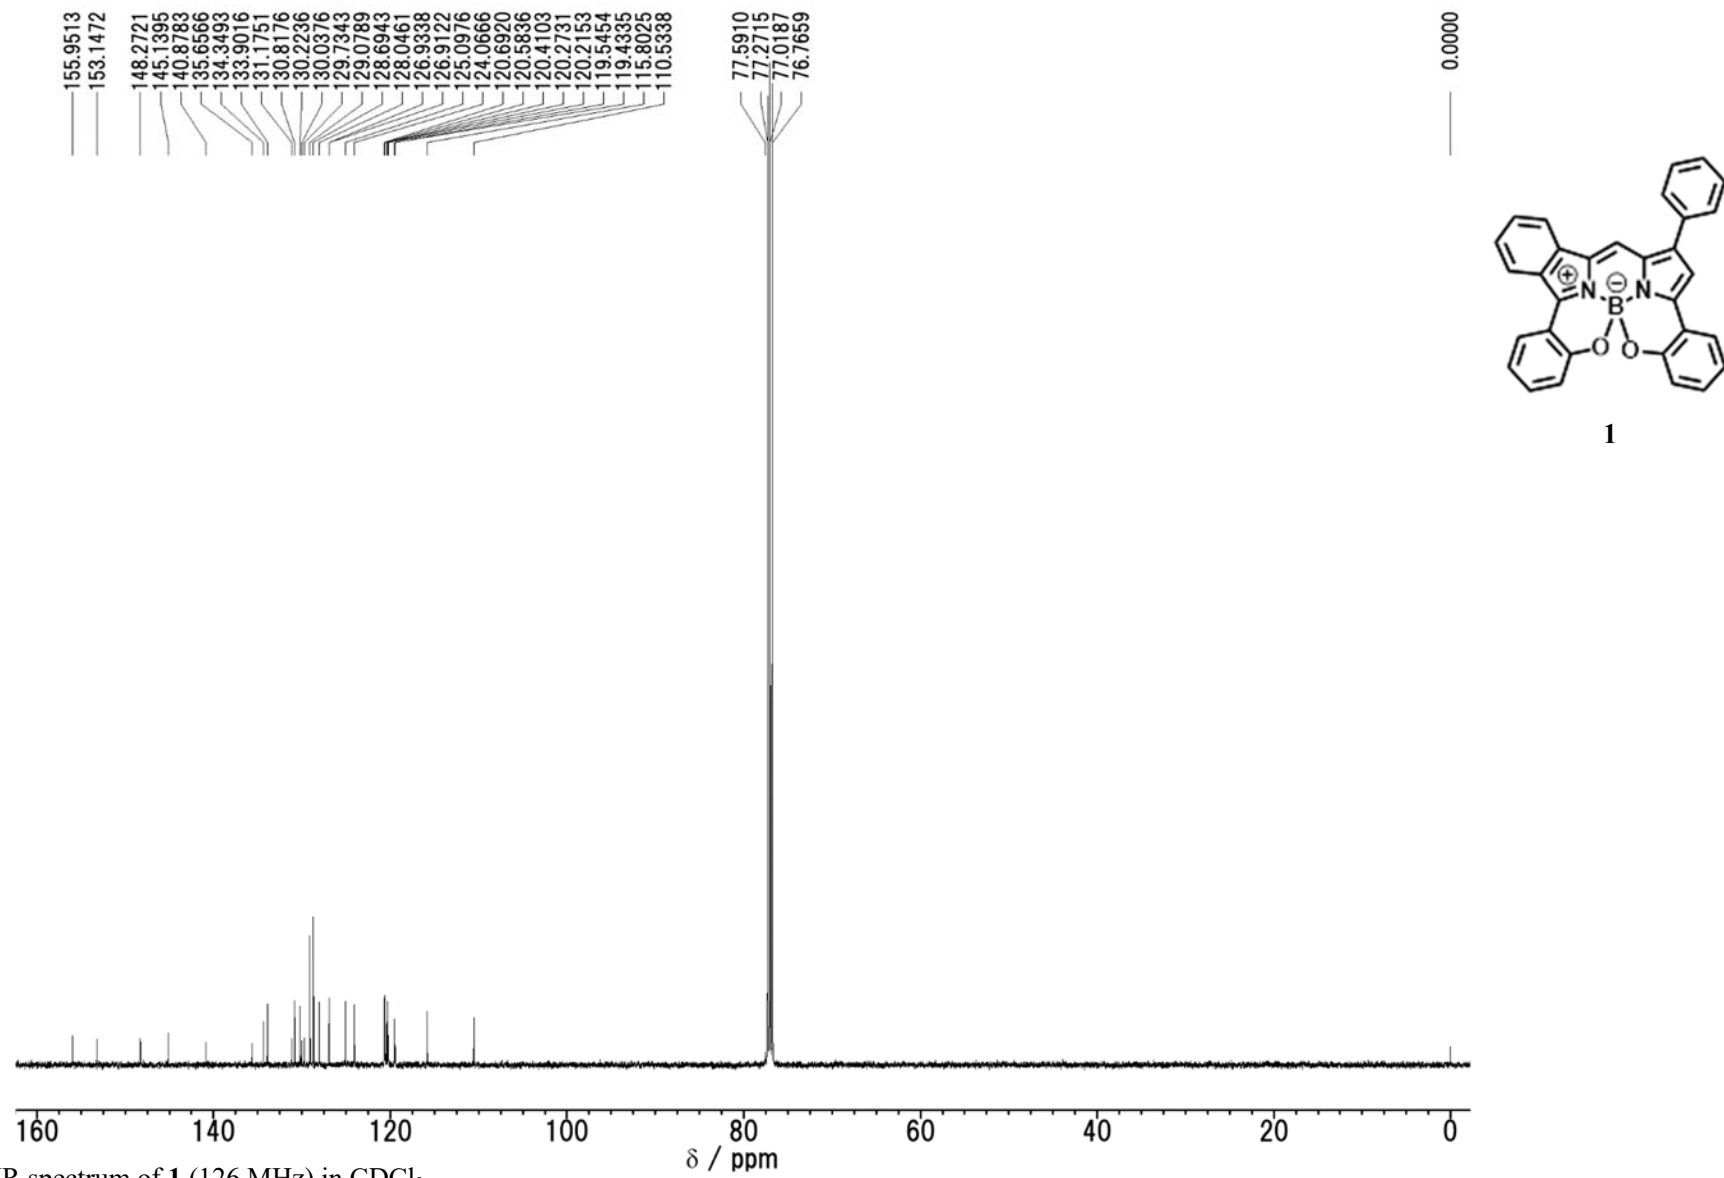

Fig. S15  $^{13}\text{C}$  NMR spectrum of **1** (126 MHz) in  $\text{CDCl}_3$ .

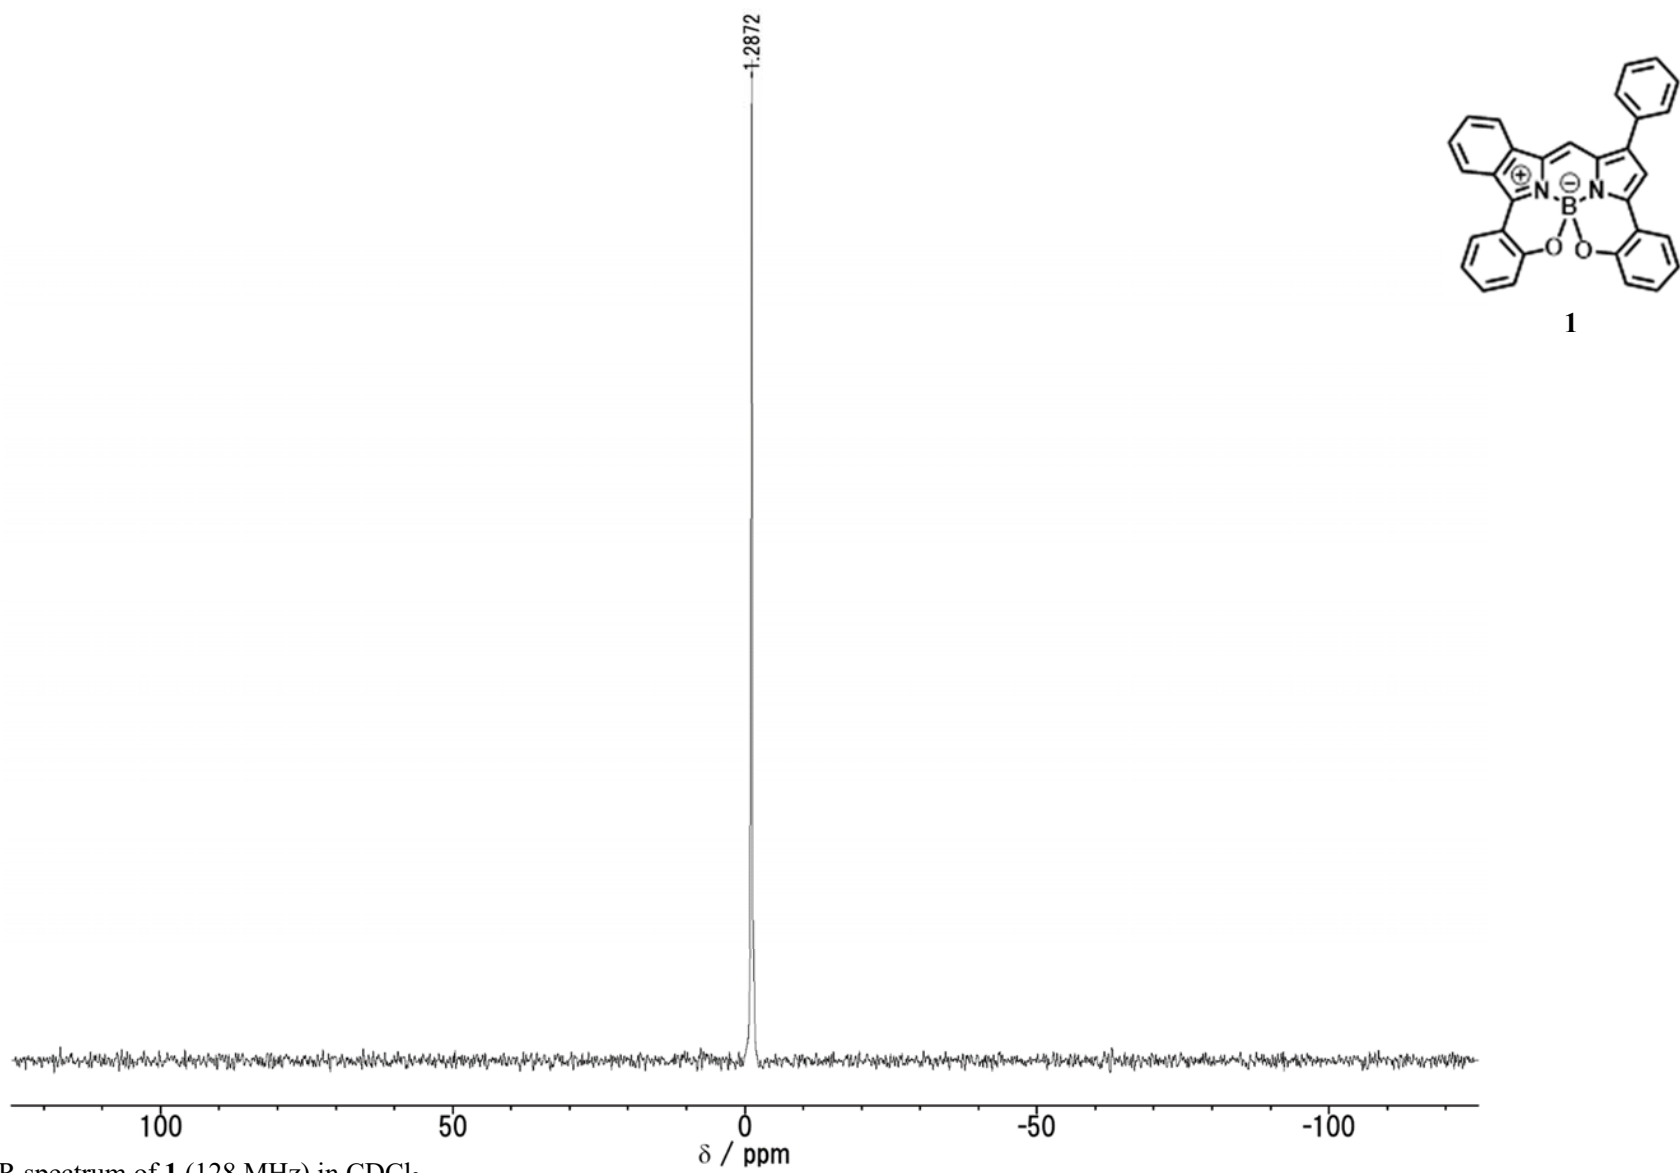

**Fig. S16**  $^{11}\text{B}$  NMR spectrum of **1** (128 MHz) in  $\text{CDCl}_3$ .



[ Mass Spectrum ]

Data : 20181205-nozawaEXP48-001 Date : 05-Dec-2018 17:13

Instrument : MStation

Sample : -

Inlet : Direct Ion Mode : FAB+

Spectrum Type : Normal Ion [MF-Linear]

Scan# : (5,10)

BP : m/z 136 Int. : 3.47 (36348)

Output m/z range : 50 to 540 Cut Level : 0.00 %

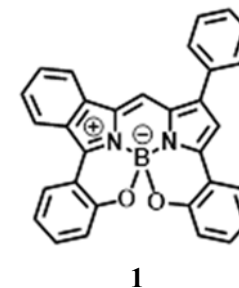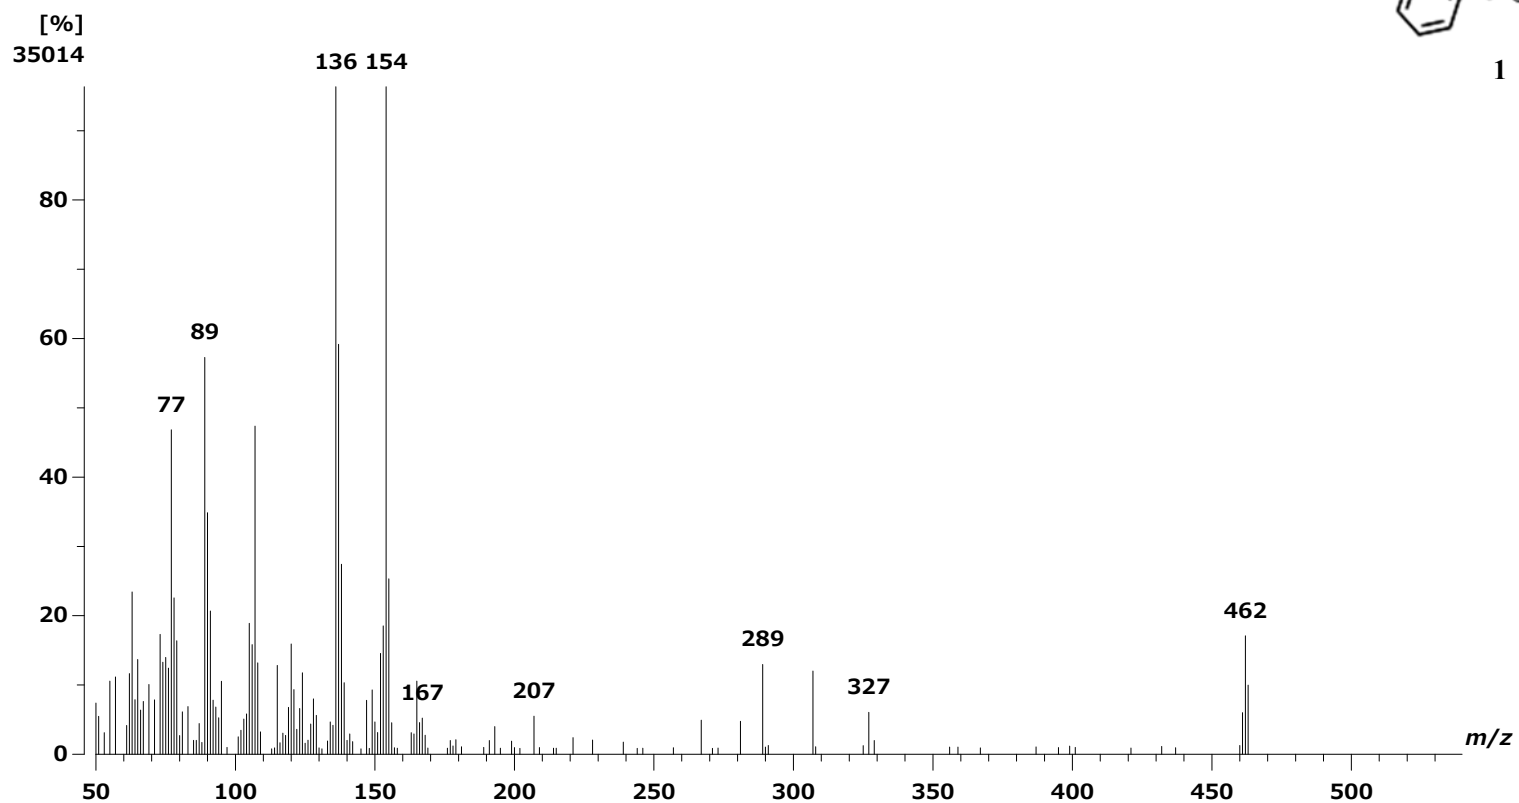

Fig. S17 FAB mass spectrum (positive mode) of 1.

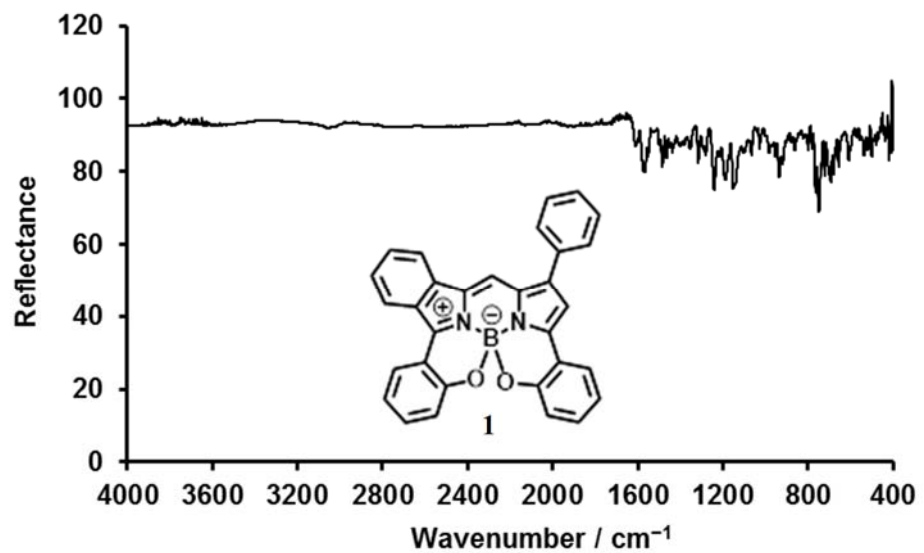

Fig. S18 ATR-FT-IR spectrum of 1.

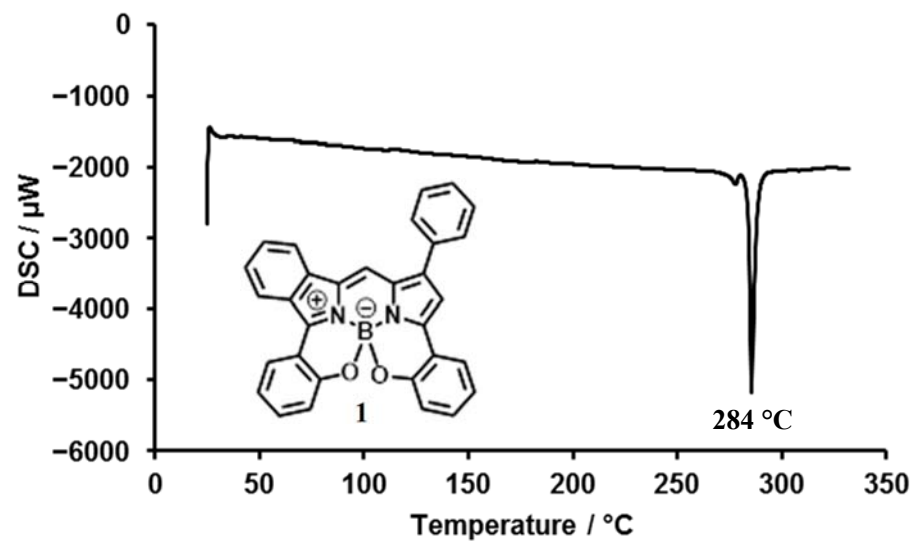

Fig. S19 DSC plots of 1.

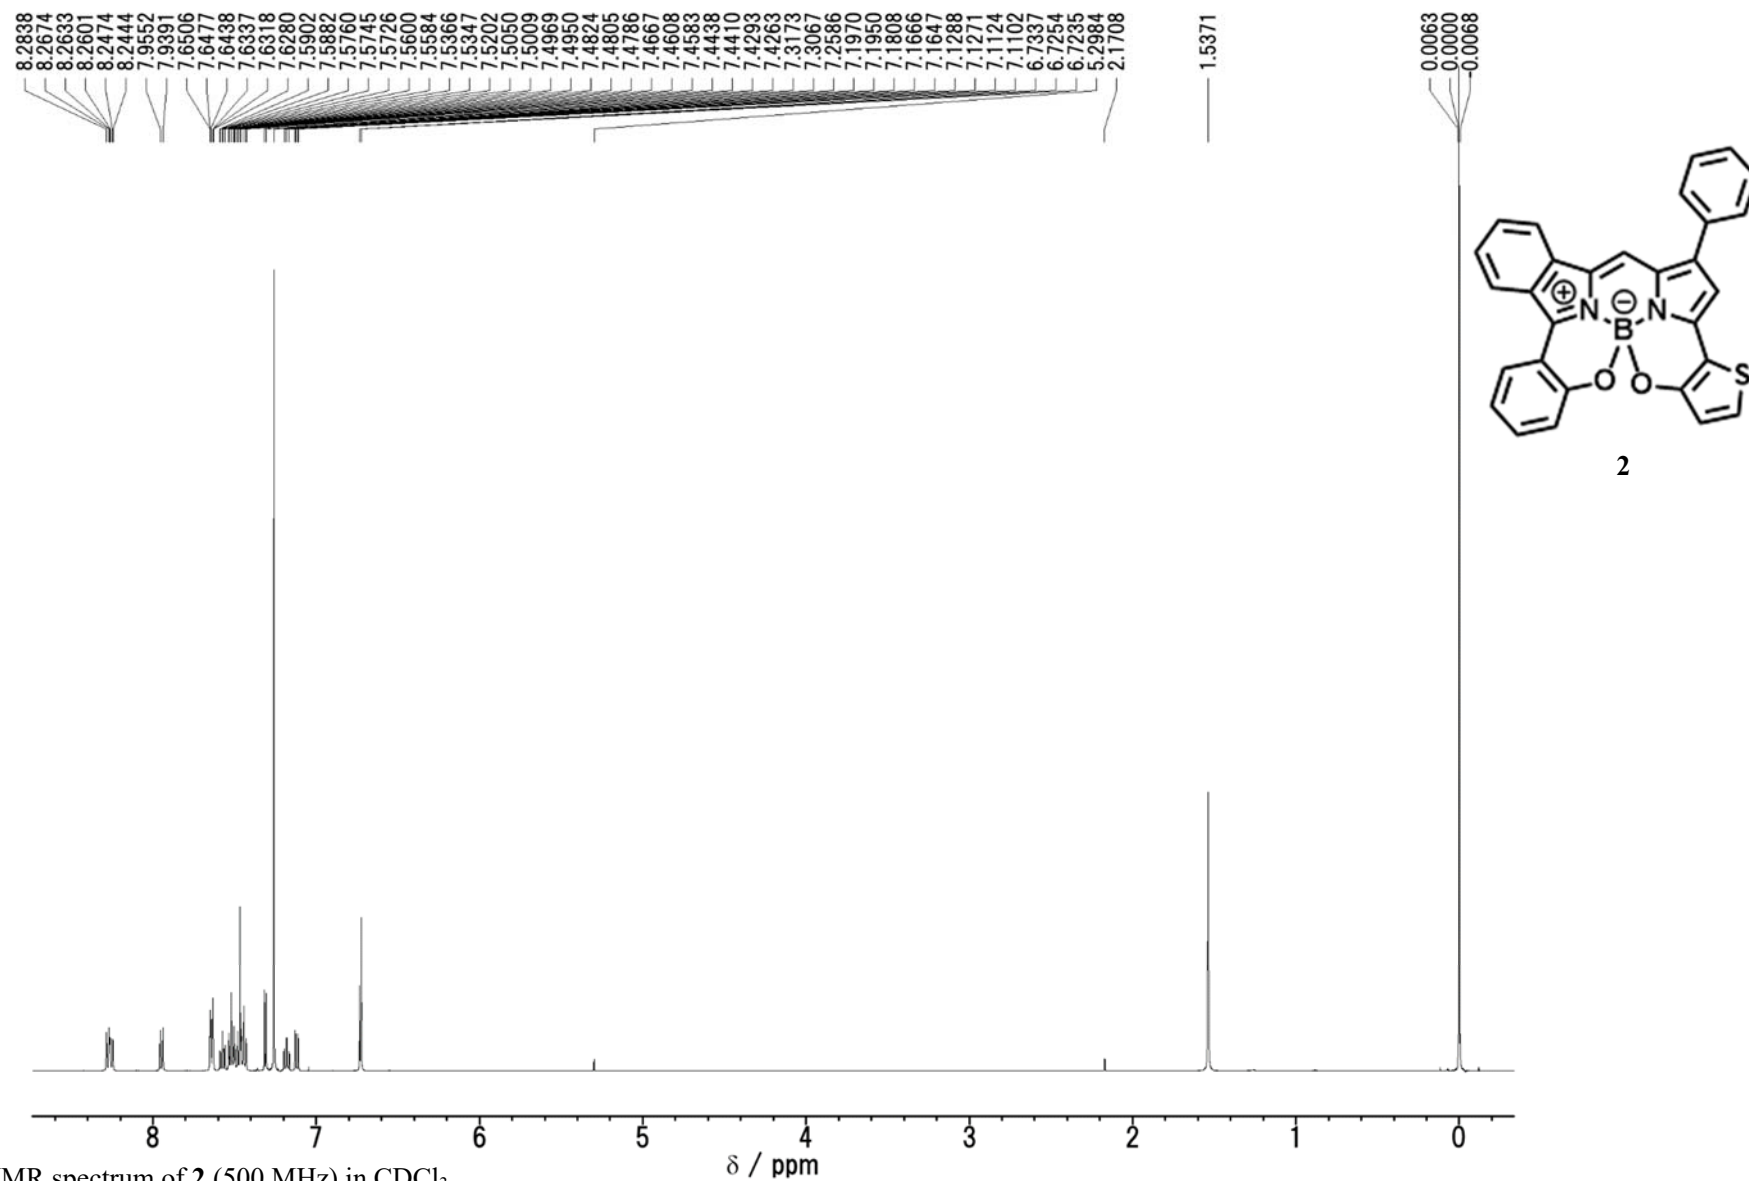

Fig. S20  $^1\text{H}$  NMR spectrum of 2 (500 MHz) in  $\text{CDCl}_3$ .

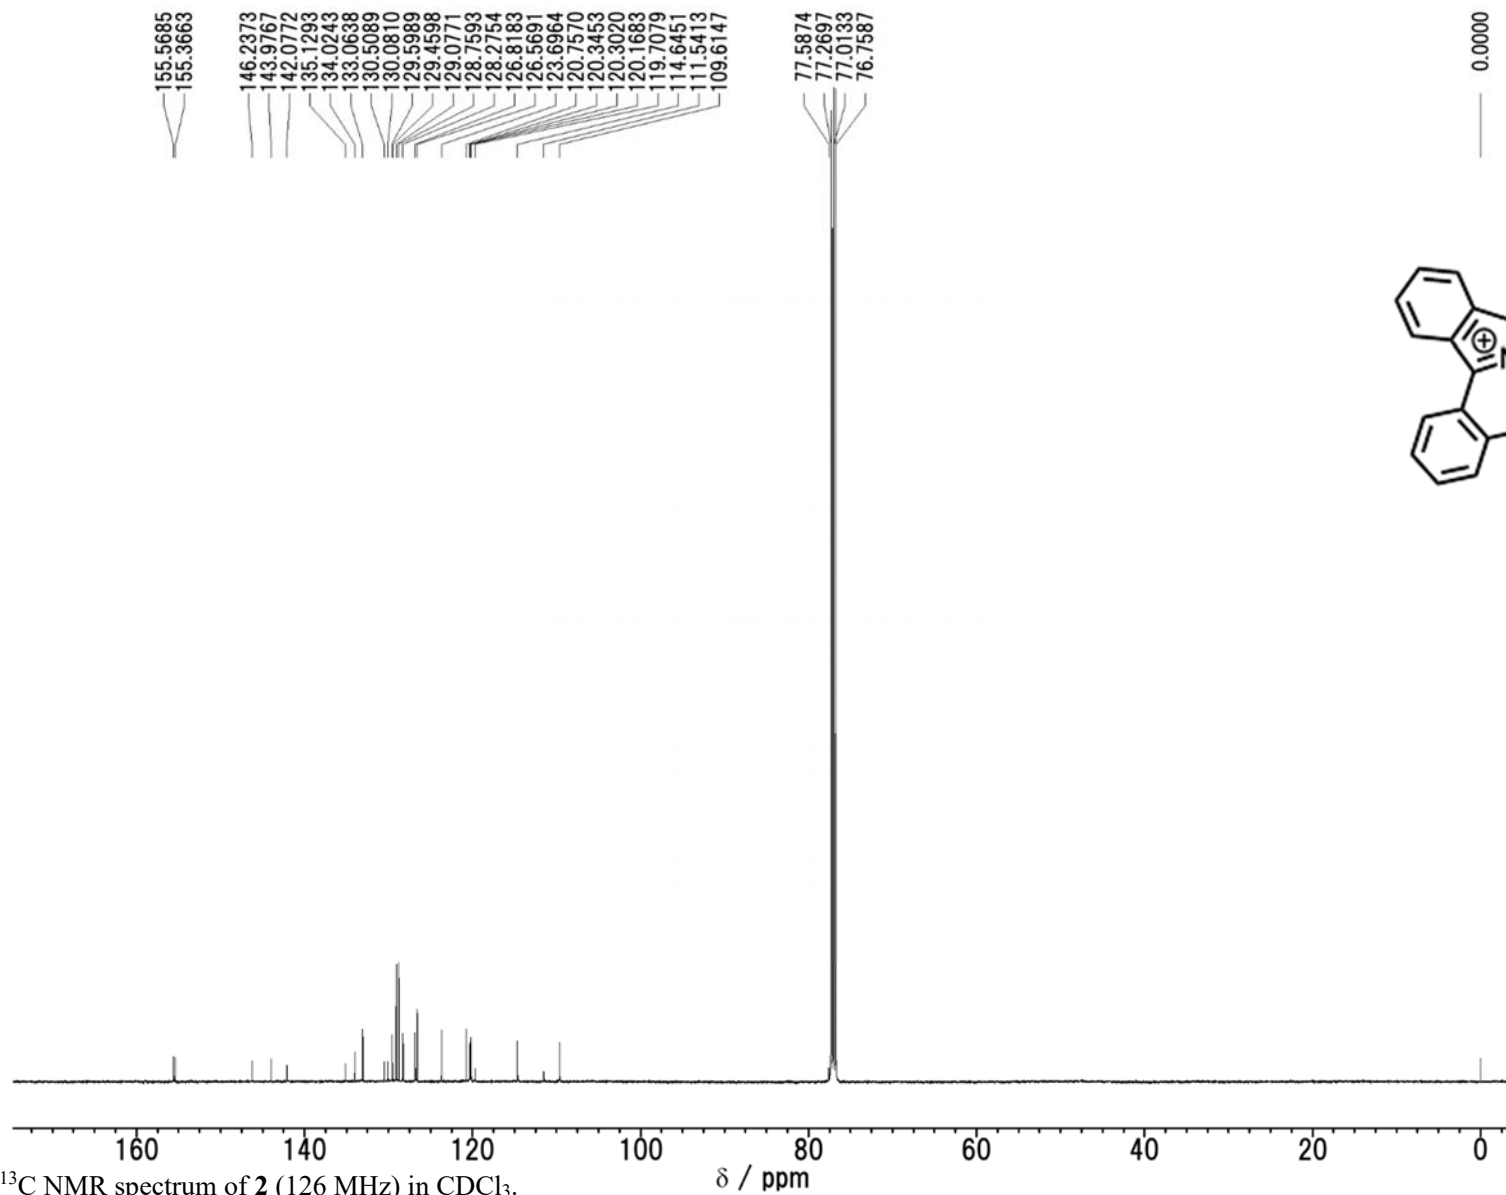

Fig. S21 <sup>13</sup>C NMR spectrum of 2 (126 MHz) in CDCl<sub>3</sub>.

δ / ppm

S-20

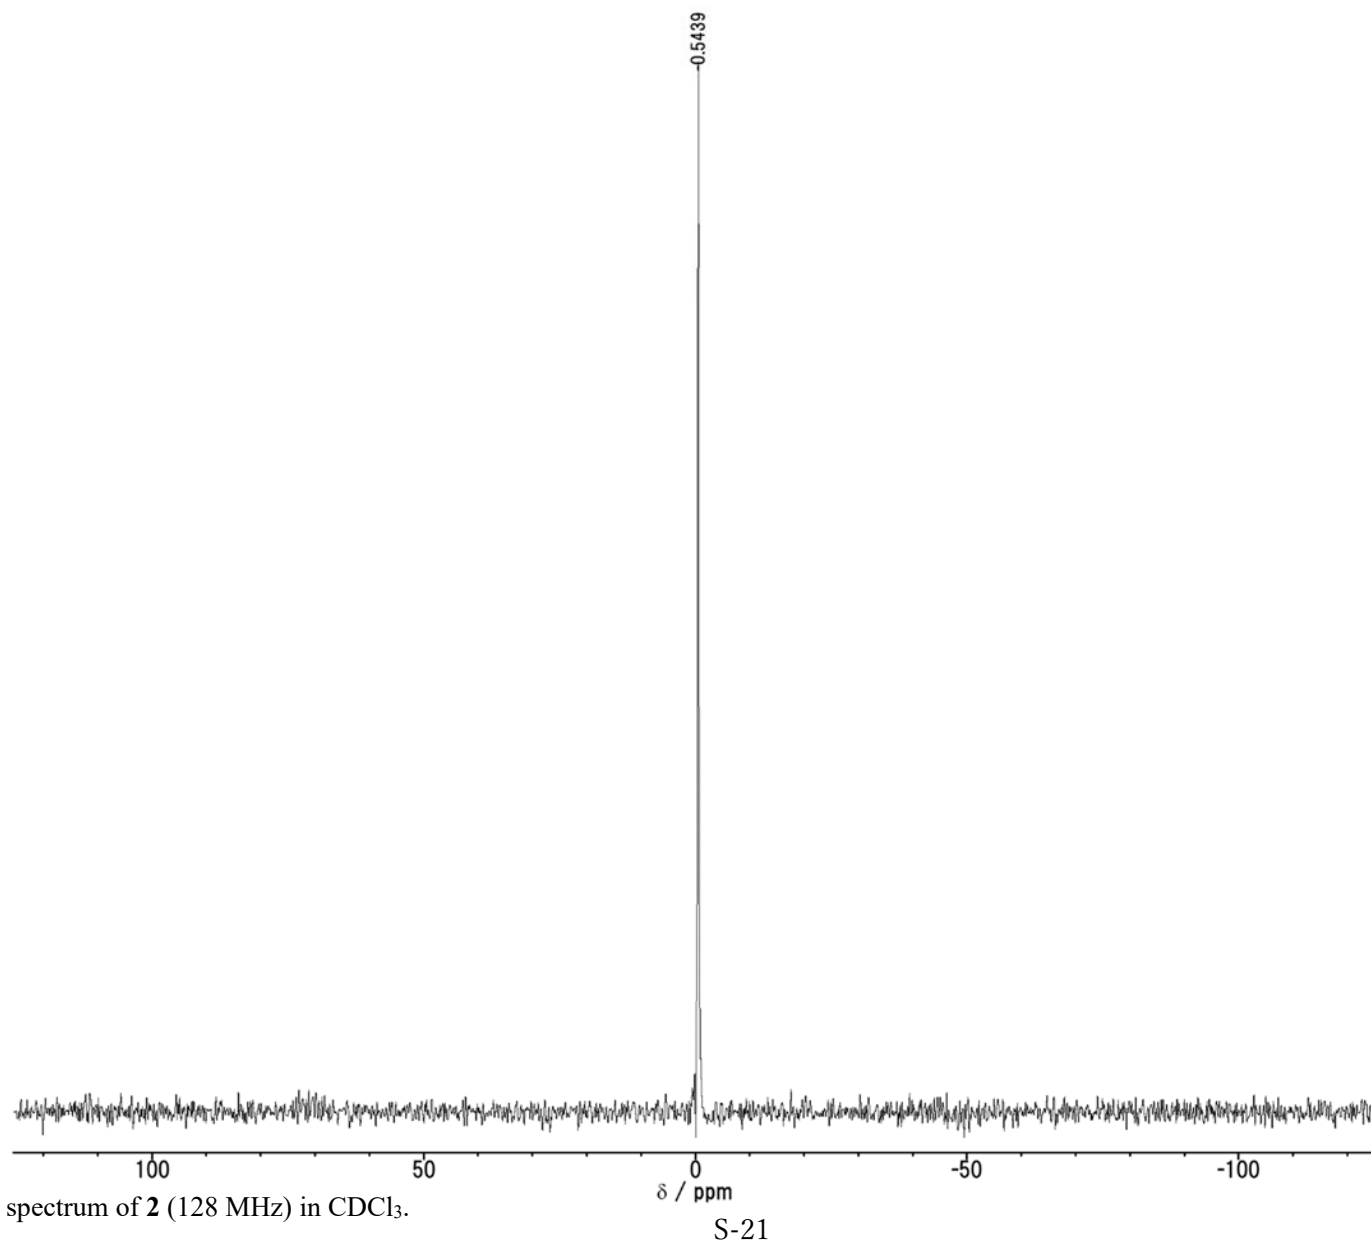

Fig. S22  $^{11}\text{B}$  NMR spectrum of **2** (128 MHz) in  $\text{CDCl}_3$ .

[ Mass Spectrum ]

Data : 181127- EXP185-001    Date : 27-Nov-2018 19:40

Instrument : MStation

Sample : -

Inlet : Direct    Ion Mode : FAB+

Spectrum Type : Normal Ion [MF-Linear]

Scan# : (2,6)

BP : m/z 154    Int. : 5.49 (57595)

Output m/z range : 50 to 505    Cut Level : 0.00 %

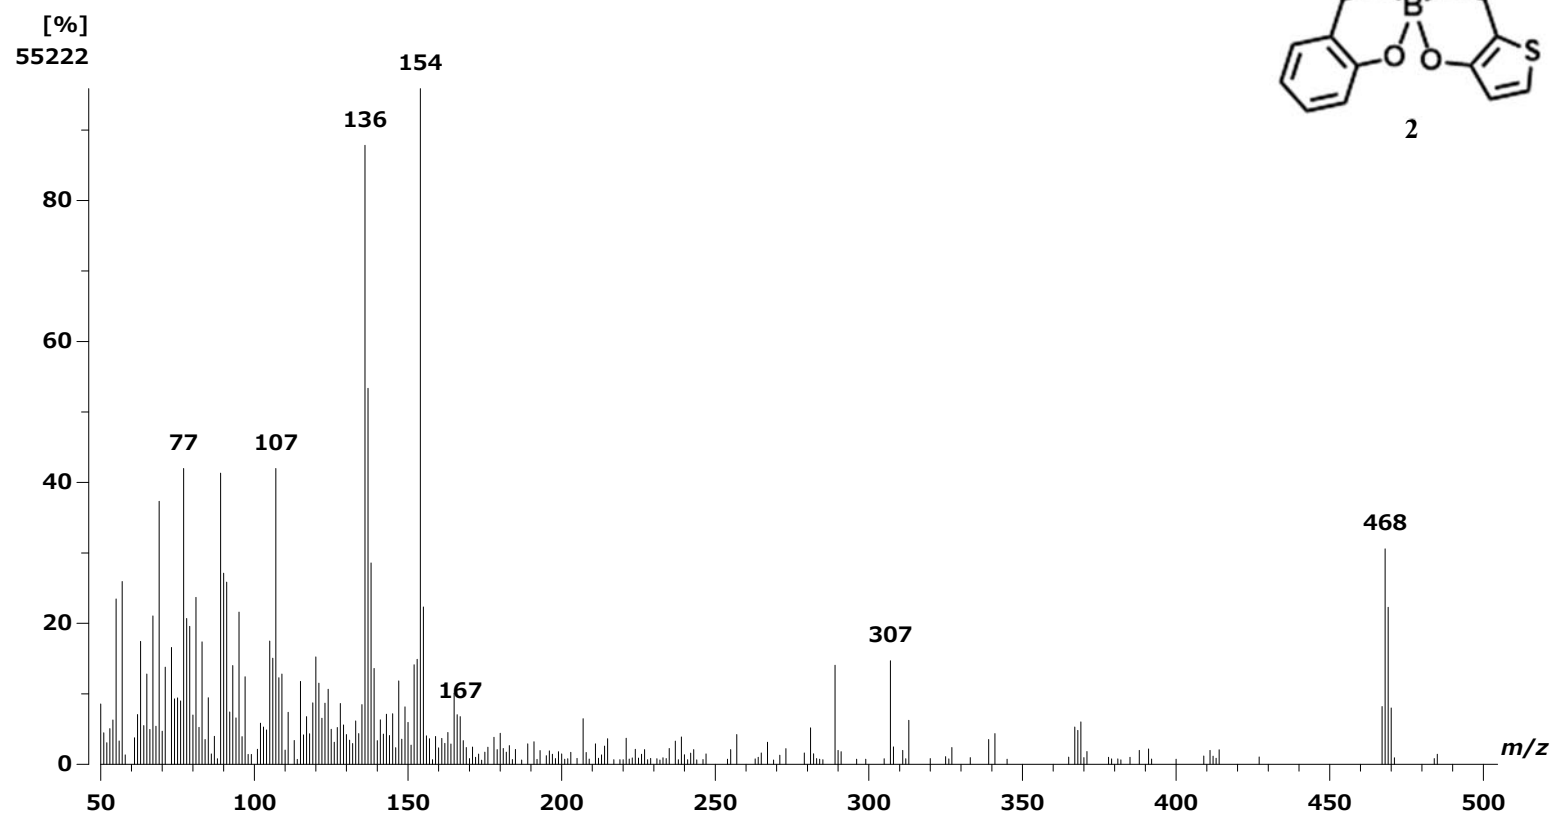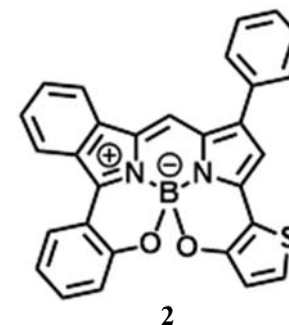

Fig. S23 FAB mass spectrum (positive mode) of 2.

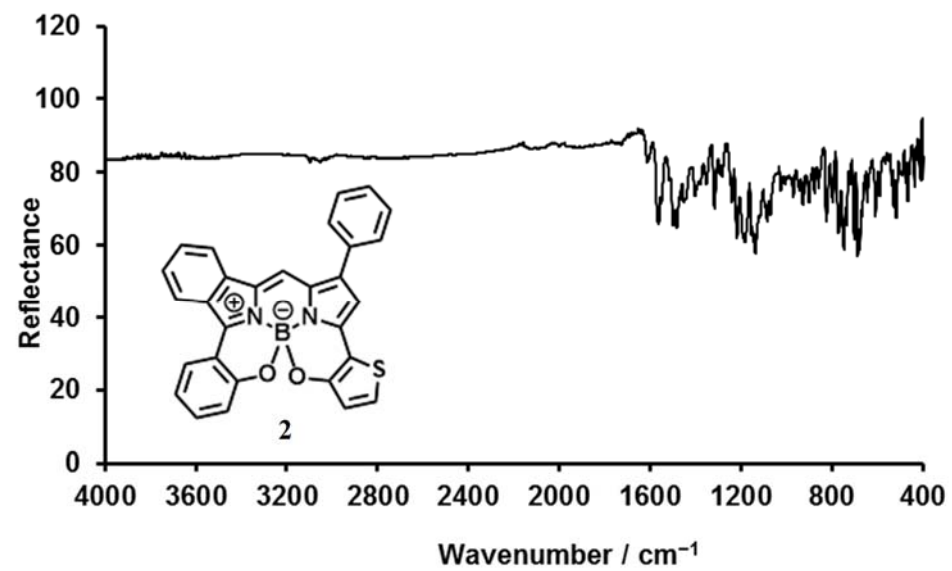

Fig. S24 ATR-FT-IR spectrum of 2.

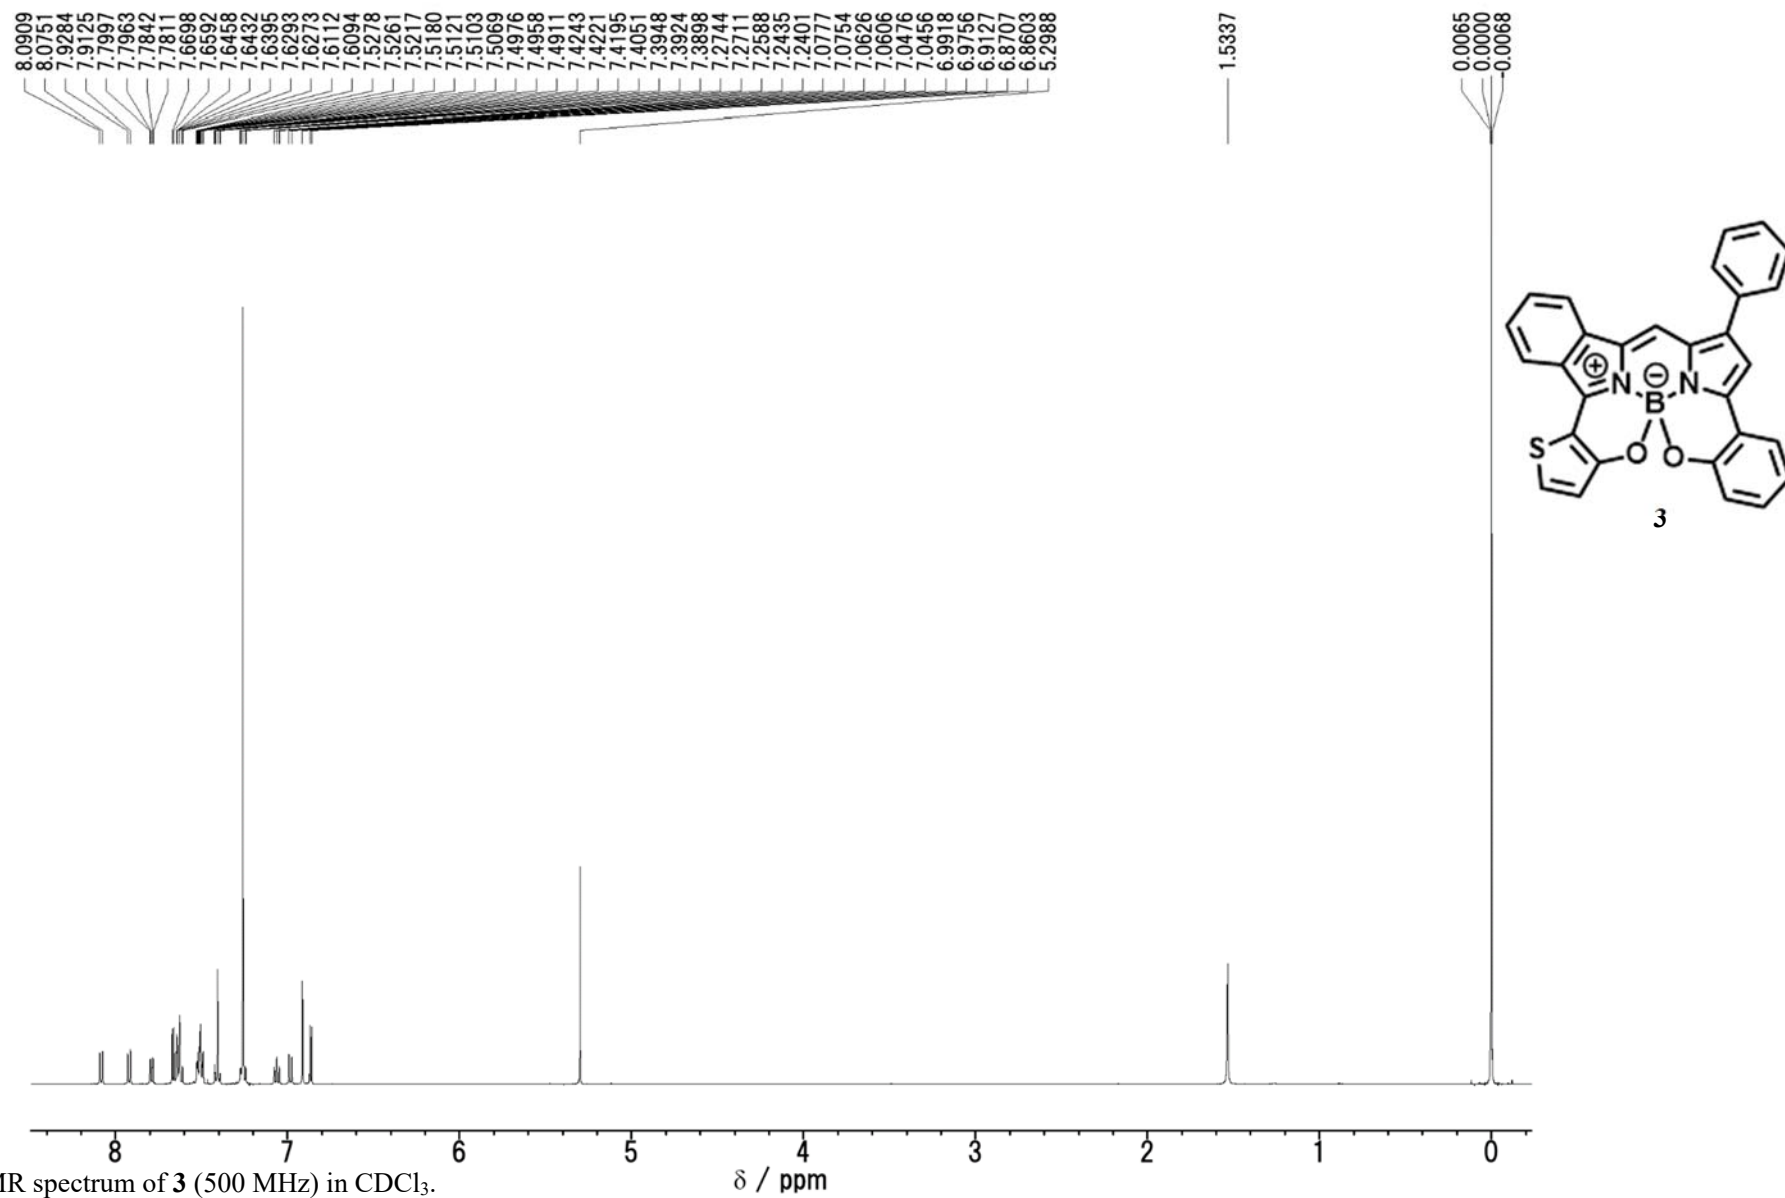

Fig. S25  $^1\text{H}$  NMR spectrum of **3** (500 MHz) in  $\text{CDCl}_3$ .



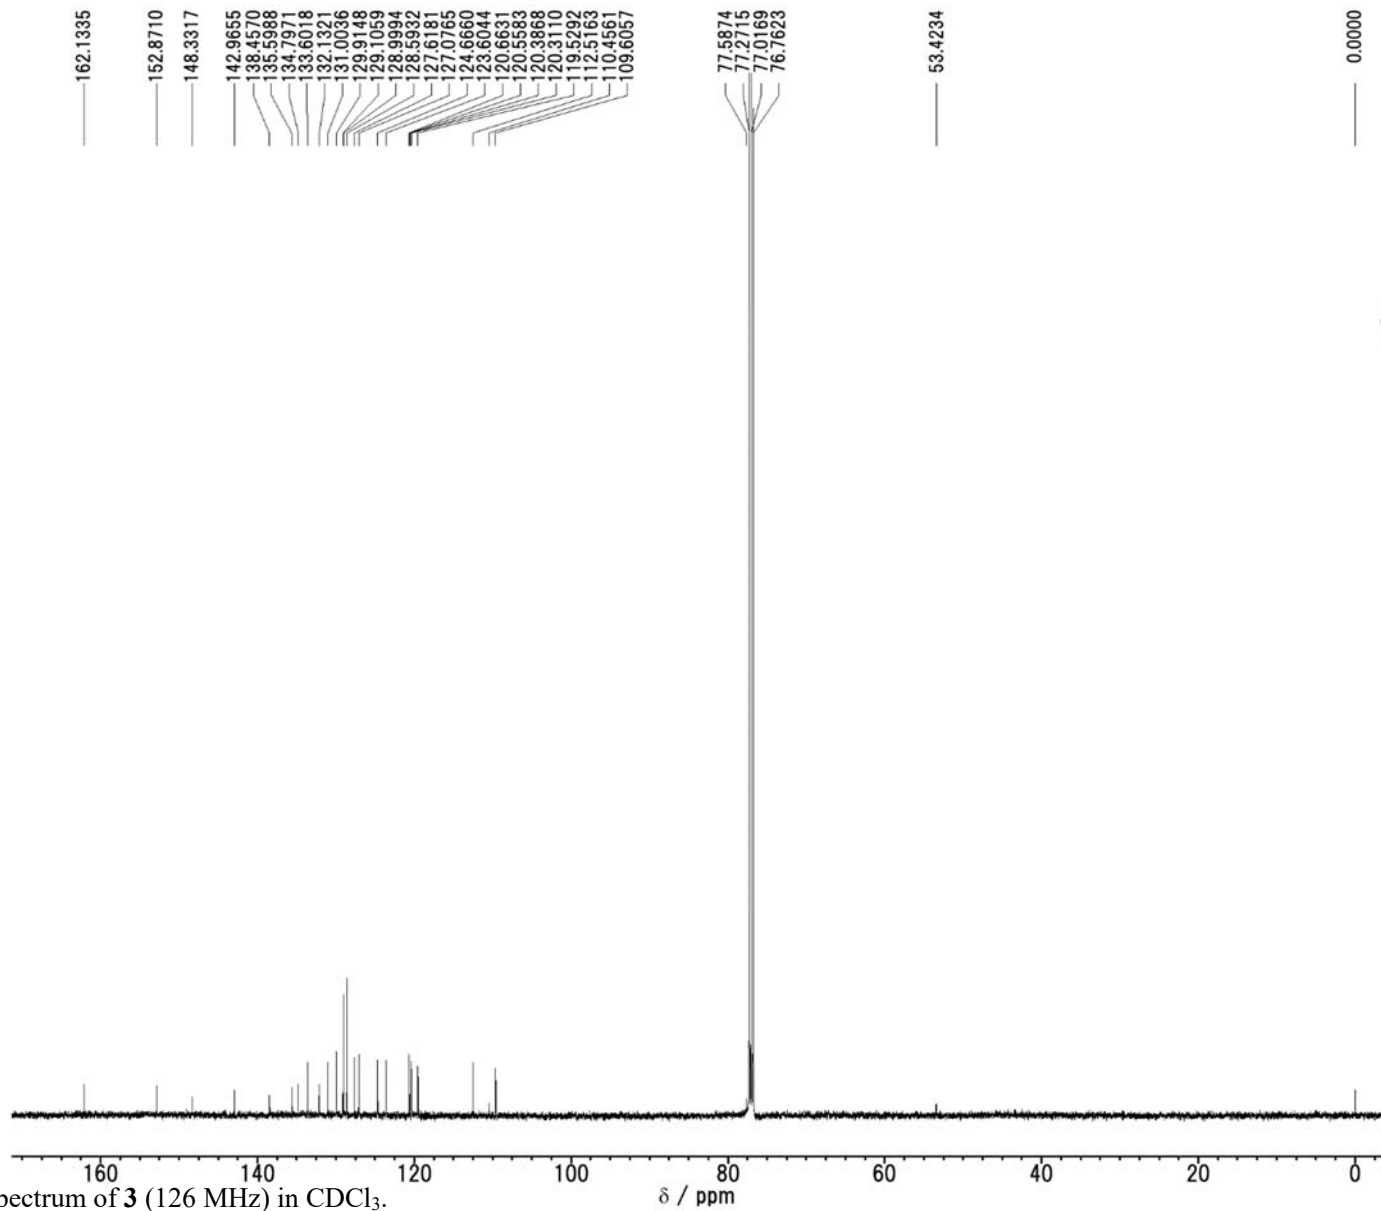

Fig. S26 <sup>13</sup>C NMR spectrum of 3 (126 MHz) in CDCl<sub>3</sub>.

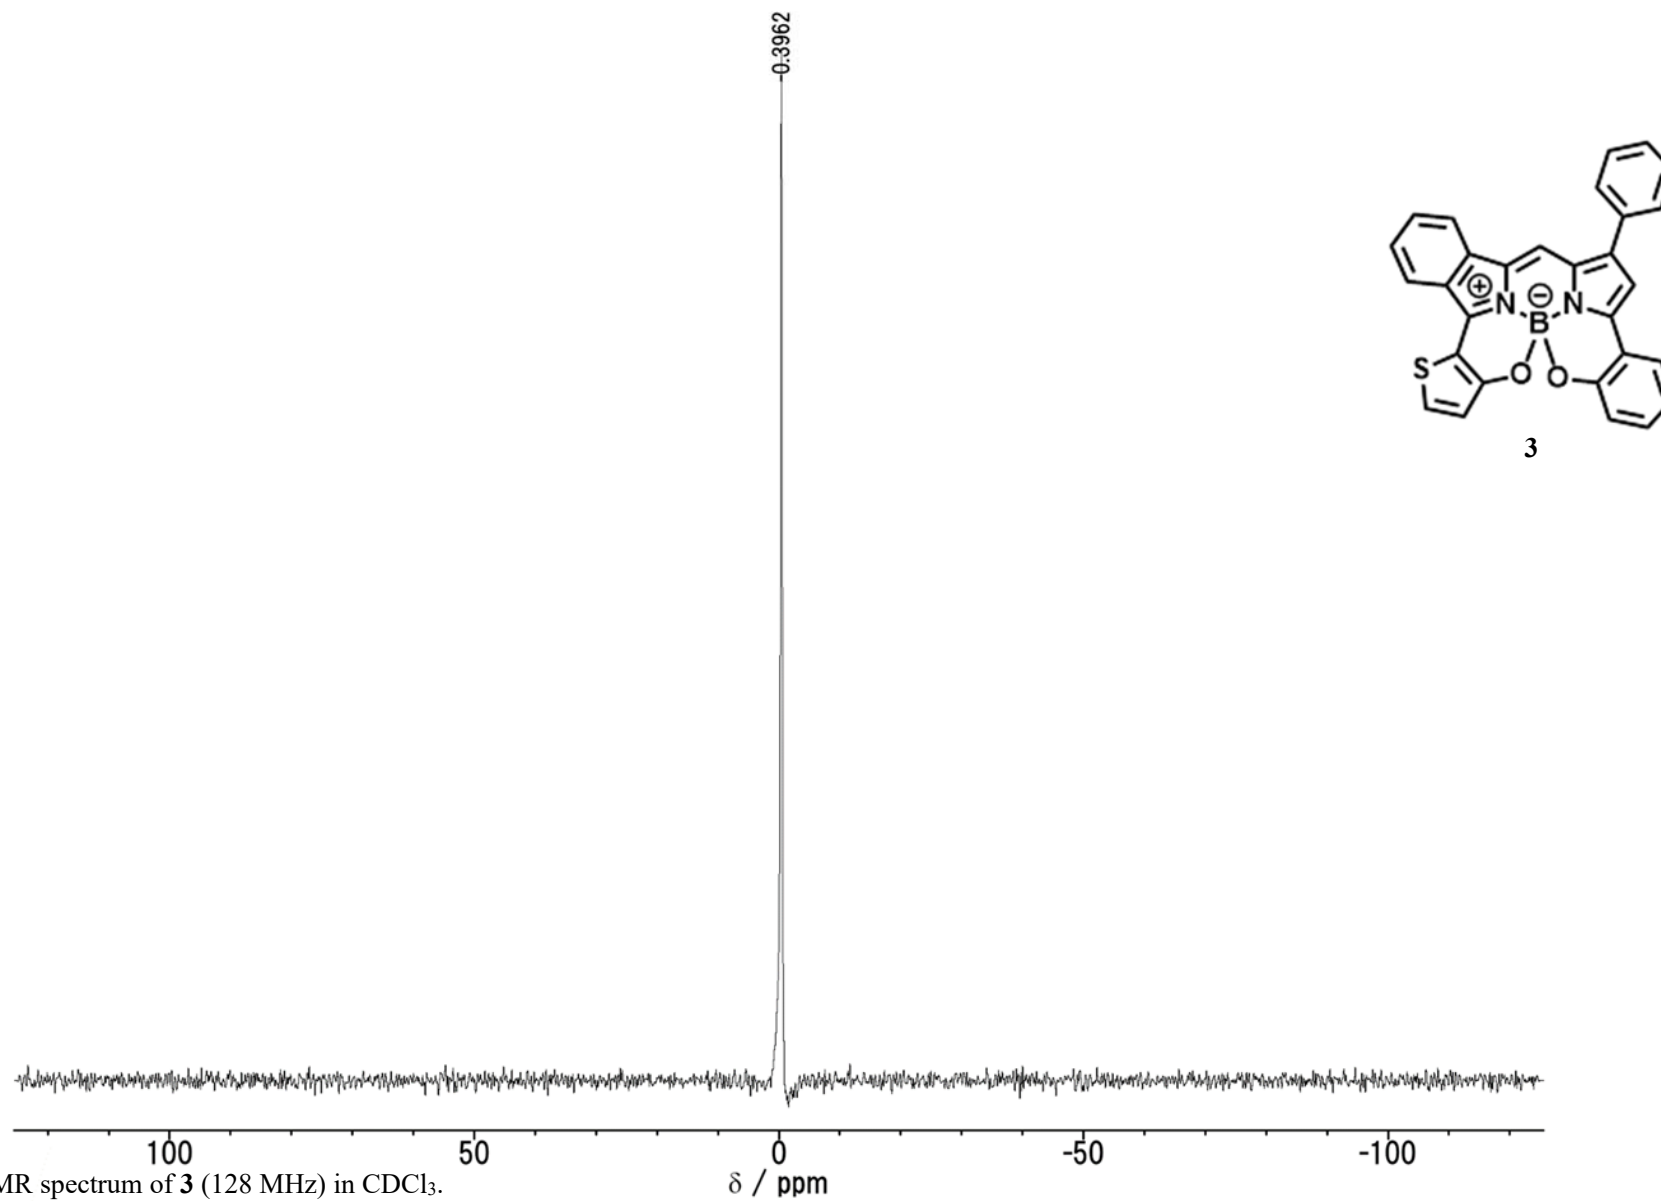

**Fig. S27**  $^{11}\text{B}$  NMR spectrum of **3** (128 MHz) in  $\text{CDCl}_3$ .

[ Mass Spectrum ]

Data : 190111- nozawa EXP56-001 Date : 11-Jan-2019 10:31

Instrument : MStation

Sample : -

Inlet : Direct Ion Mode : FAB+

Spectrum Type : Normal Ion [MF-Linear]

Scan# : (2,3)

BP : m/z 468 Int. : 4.94 (51807)

Output m/z range : 50 to 502 Cut Level : 0.00 %

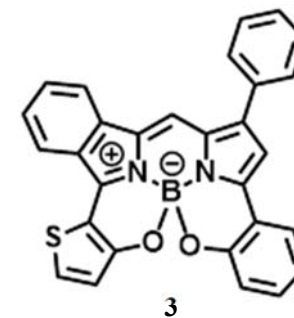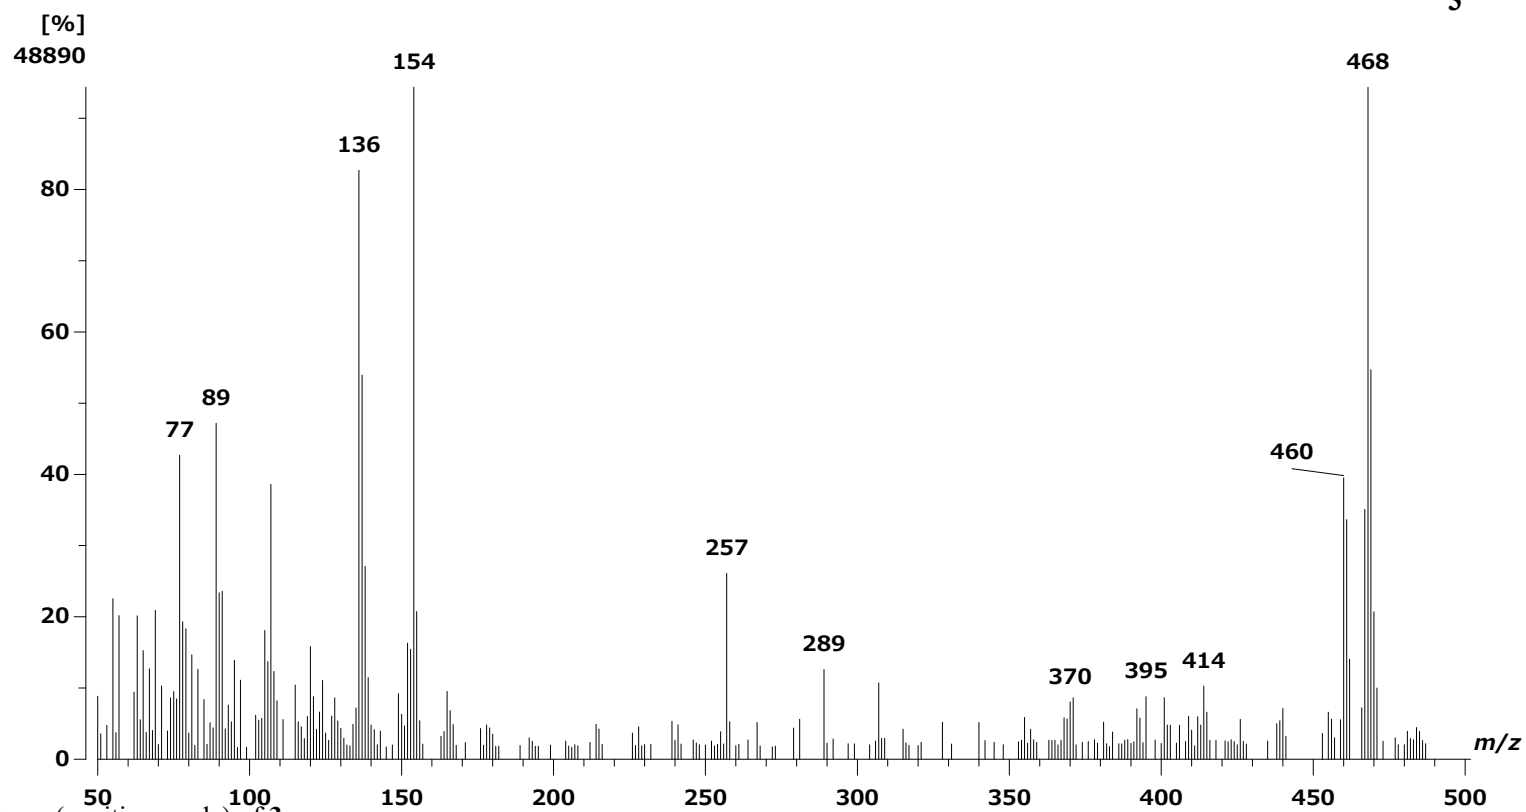

Fig. S28 FAB mass spectrum (positive mode) of 3.

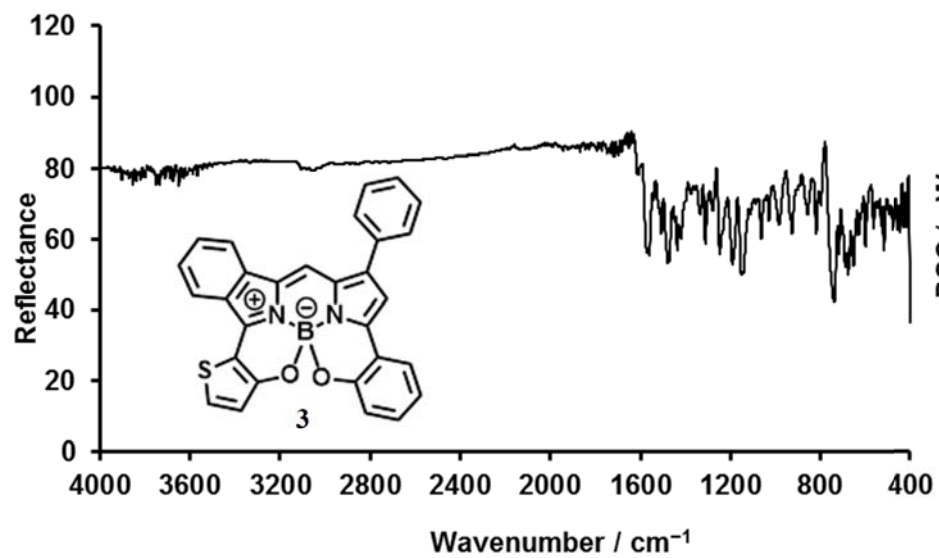

Fig. S29 ATR-FT-IR spectrum of 3.

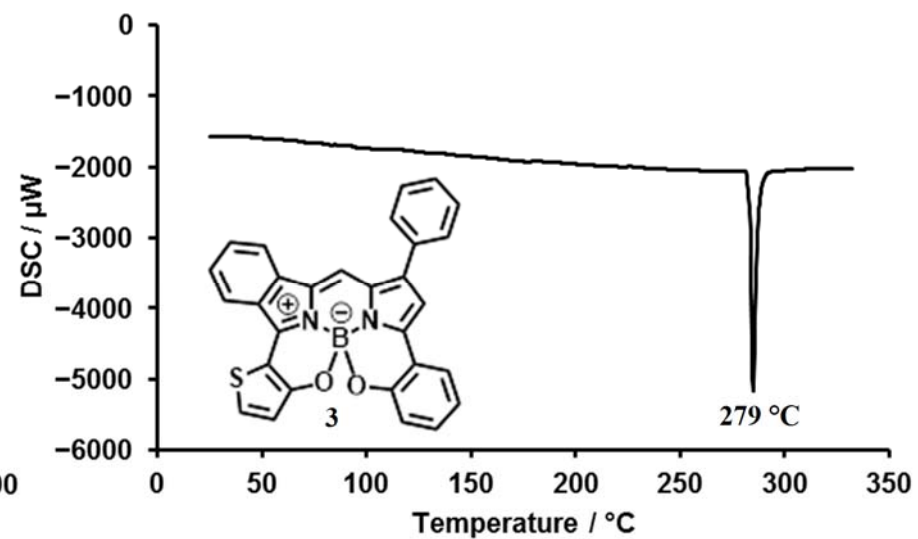

Fig. S30 DSC plots of 3.

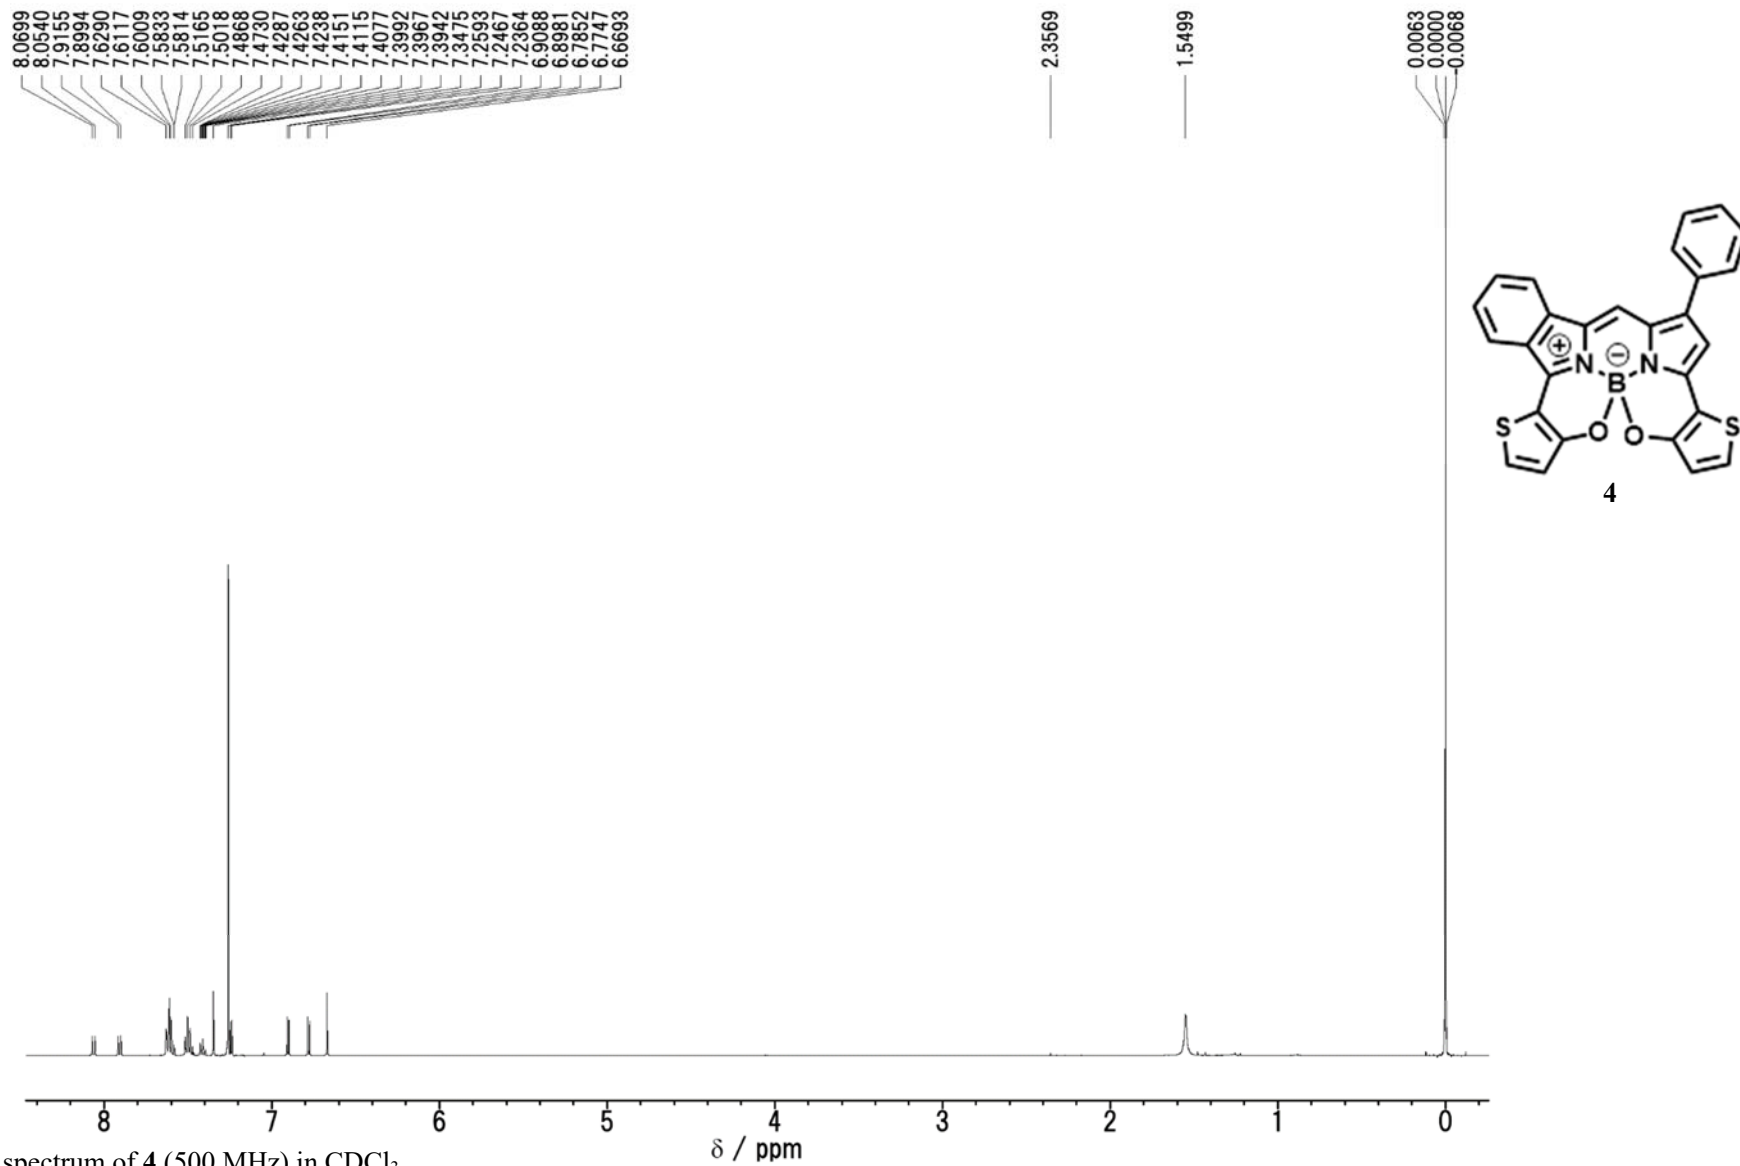

Fig. S31  $^1\text{H}$  NMR spectrum of 4 (500 MHz) in  $\text{CDCl}_3$ .

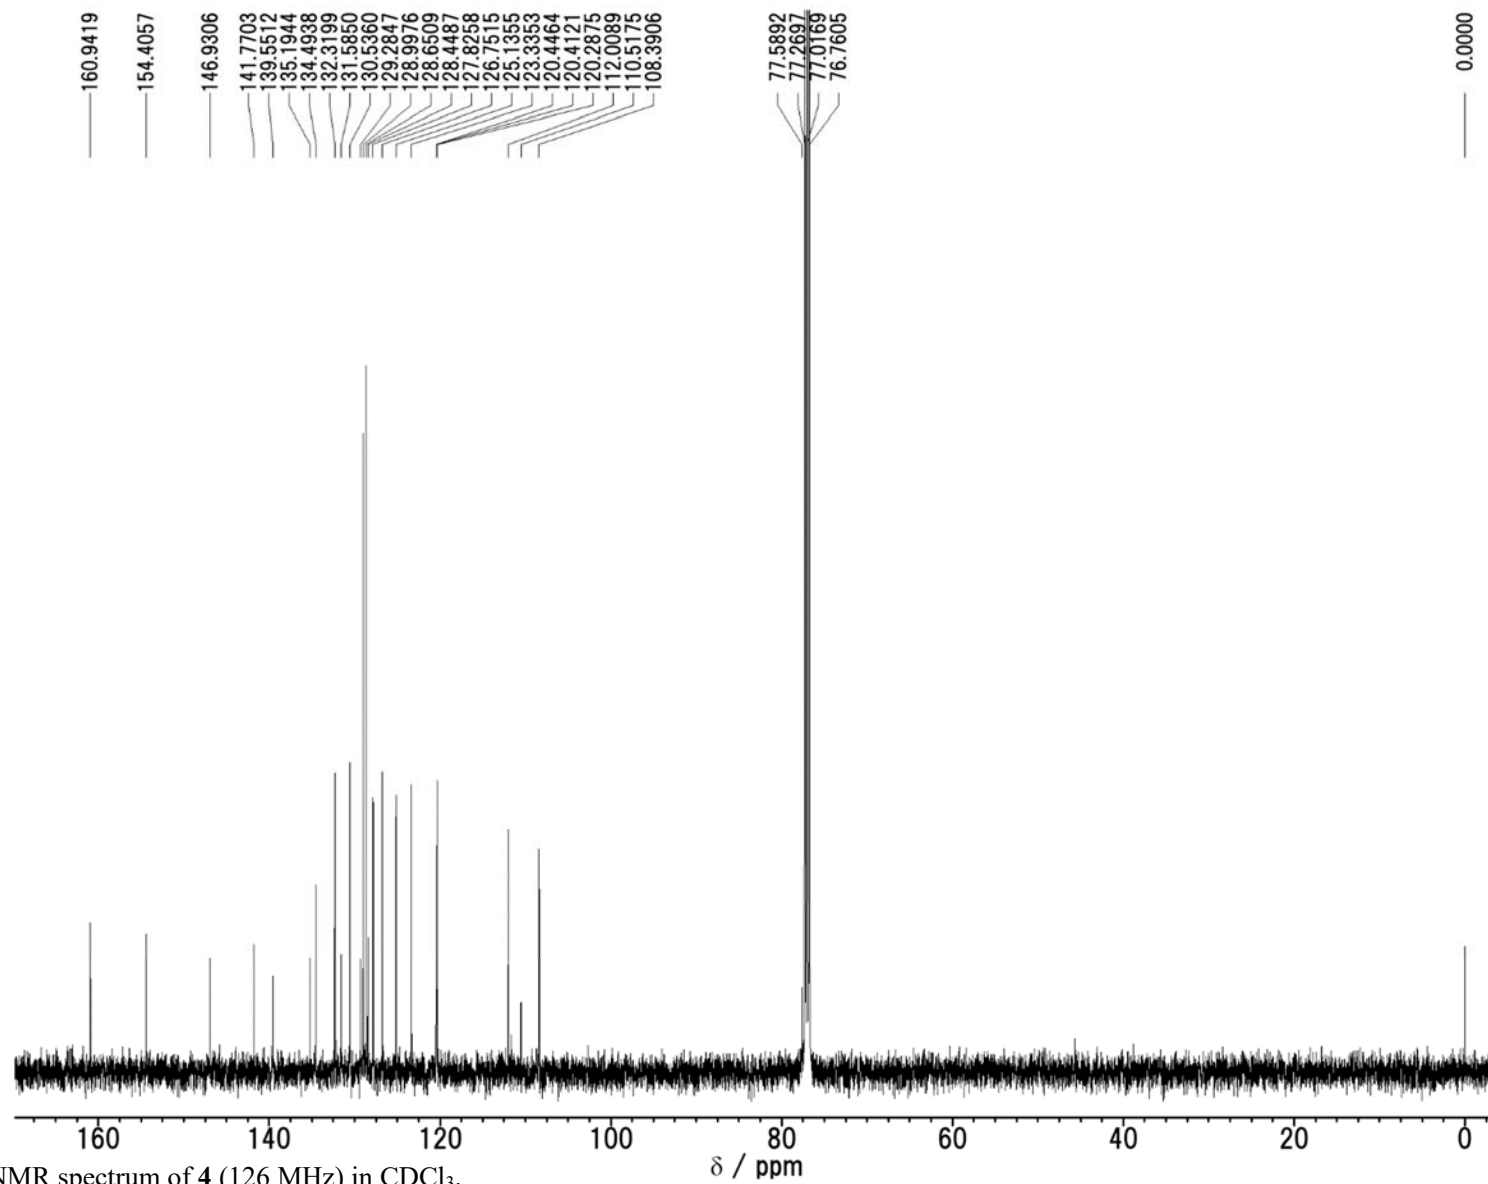

Fig. S32  $^{13}\text{C}$  NMR spectrum of 4 (126 MHz) in  $\text{CDCl}_3$ .

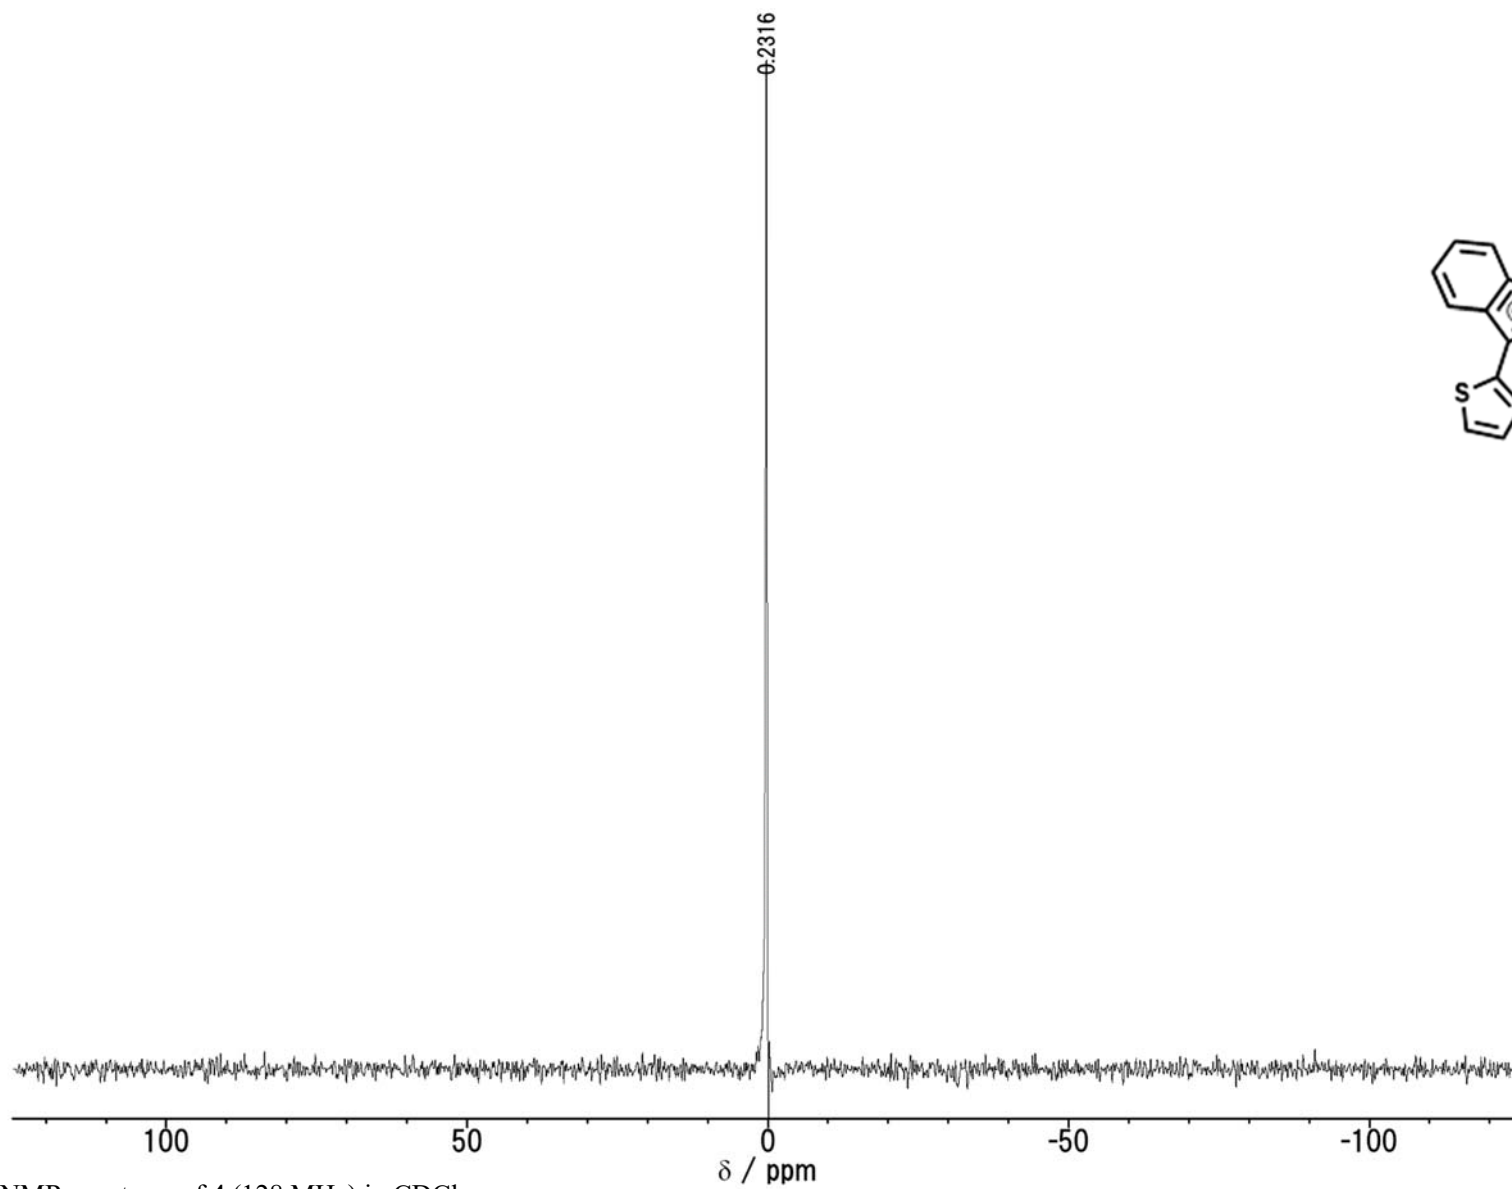

**Fig. S33**  $^{11}\text{B}$  NMR spectrum of **4** (128 MHz) in  $\text{CDCl}_3$ .

[ Mass Spectrum ]

Data : 190612-Nozawa EXP85 after hexane wash-002 Date : 19-Jun-2019 17:20

Instrument : MStation

Sample : -

Inlet : Direct Ion Mode : FAB+

Spectrum Type : Normal Ion [MF-Linear]

Scan# : (3,8)

BP : m/z 154 Int. : 96.56 (1012546)

Output m/z range : 50 to 522 Cut Level : 0.00 %

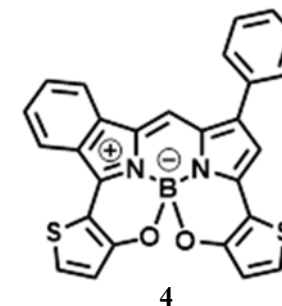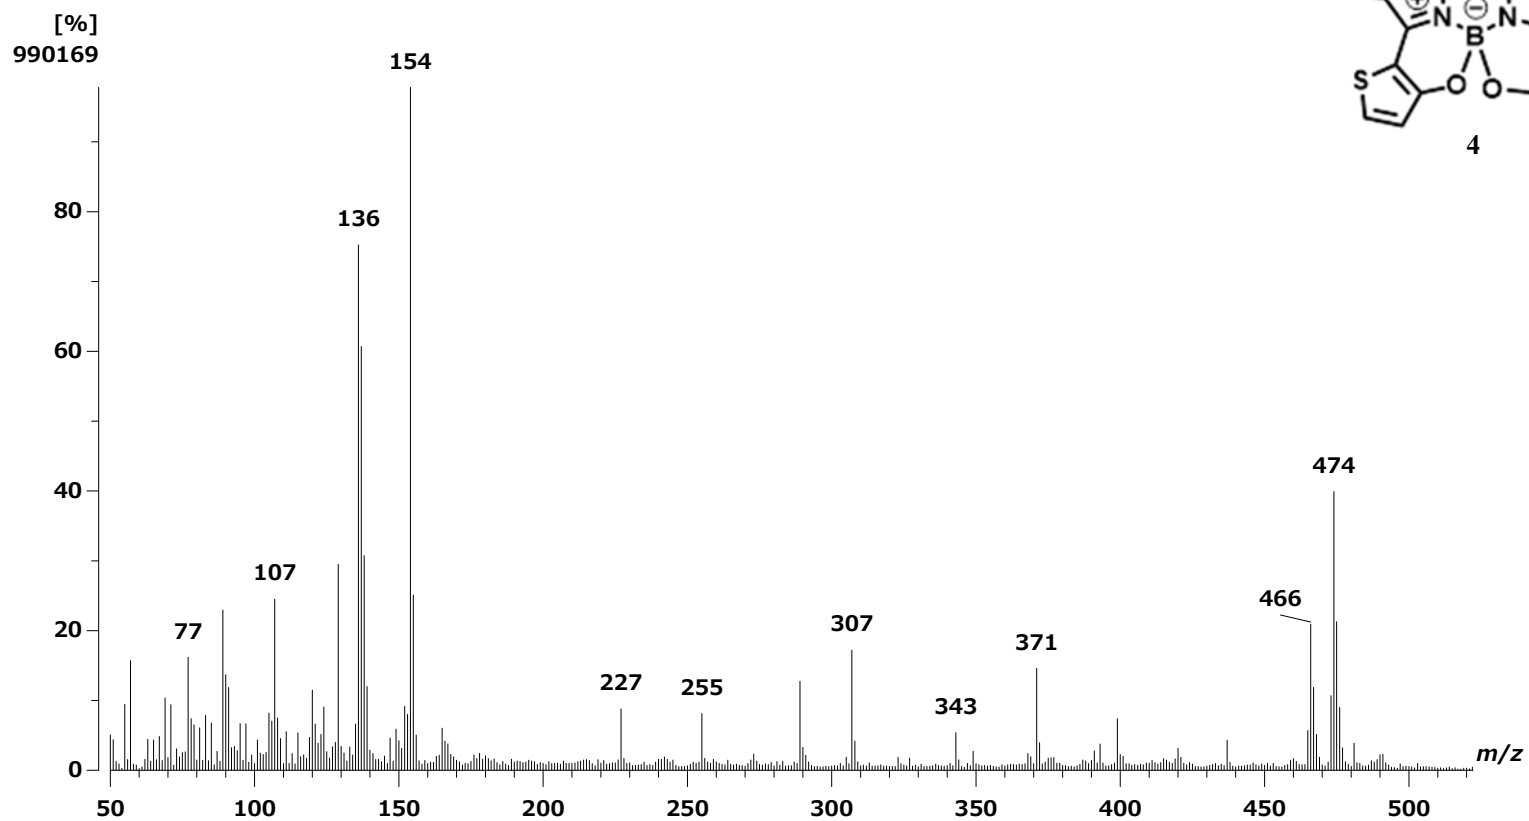

Fig. S34 FAB mass spectrum (positive mode) of 4.



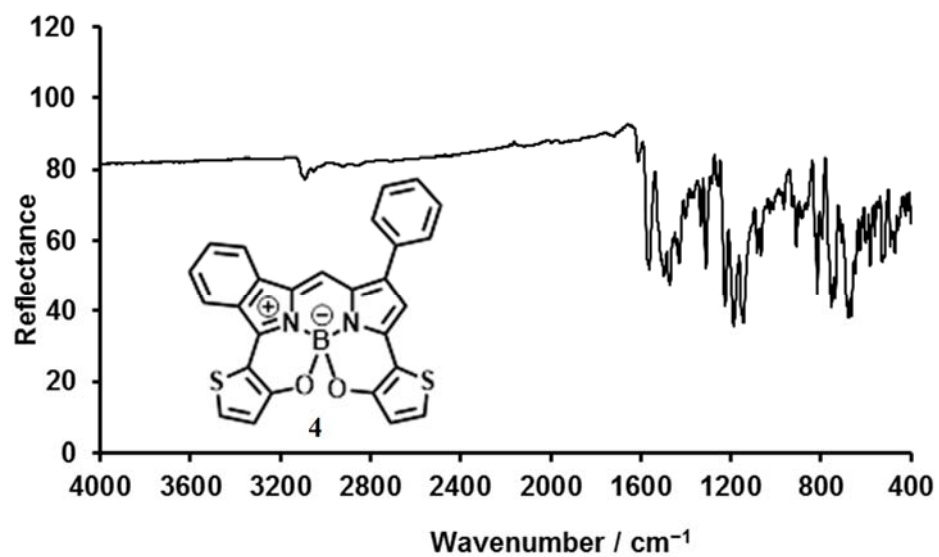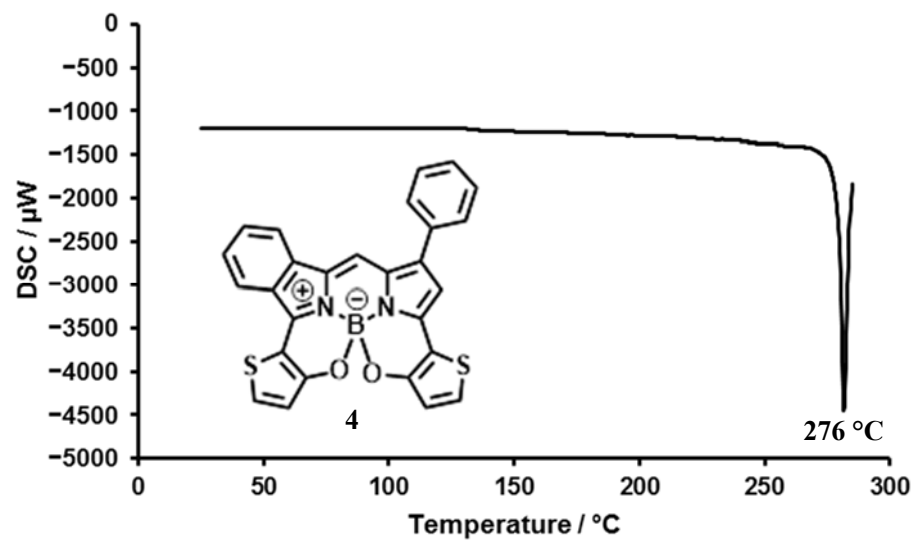

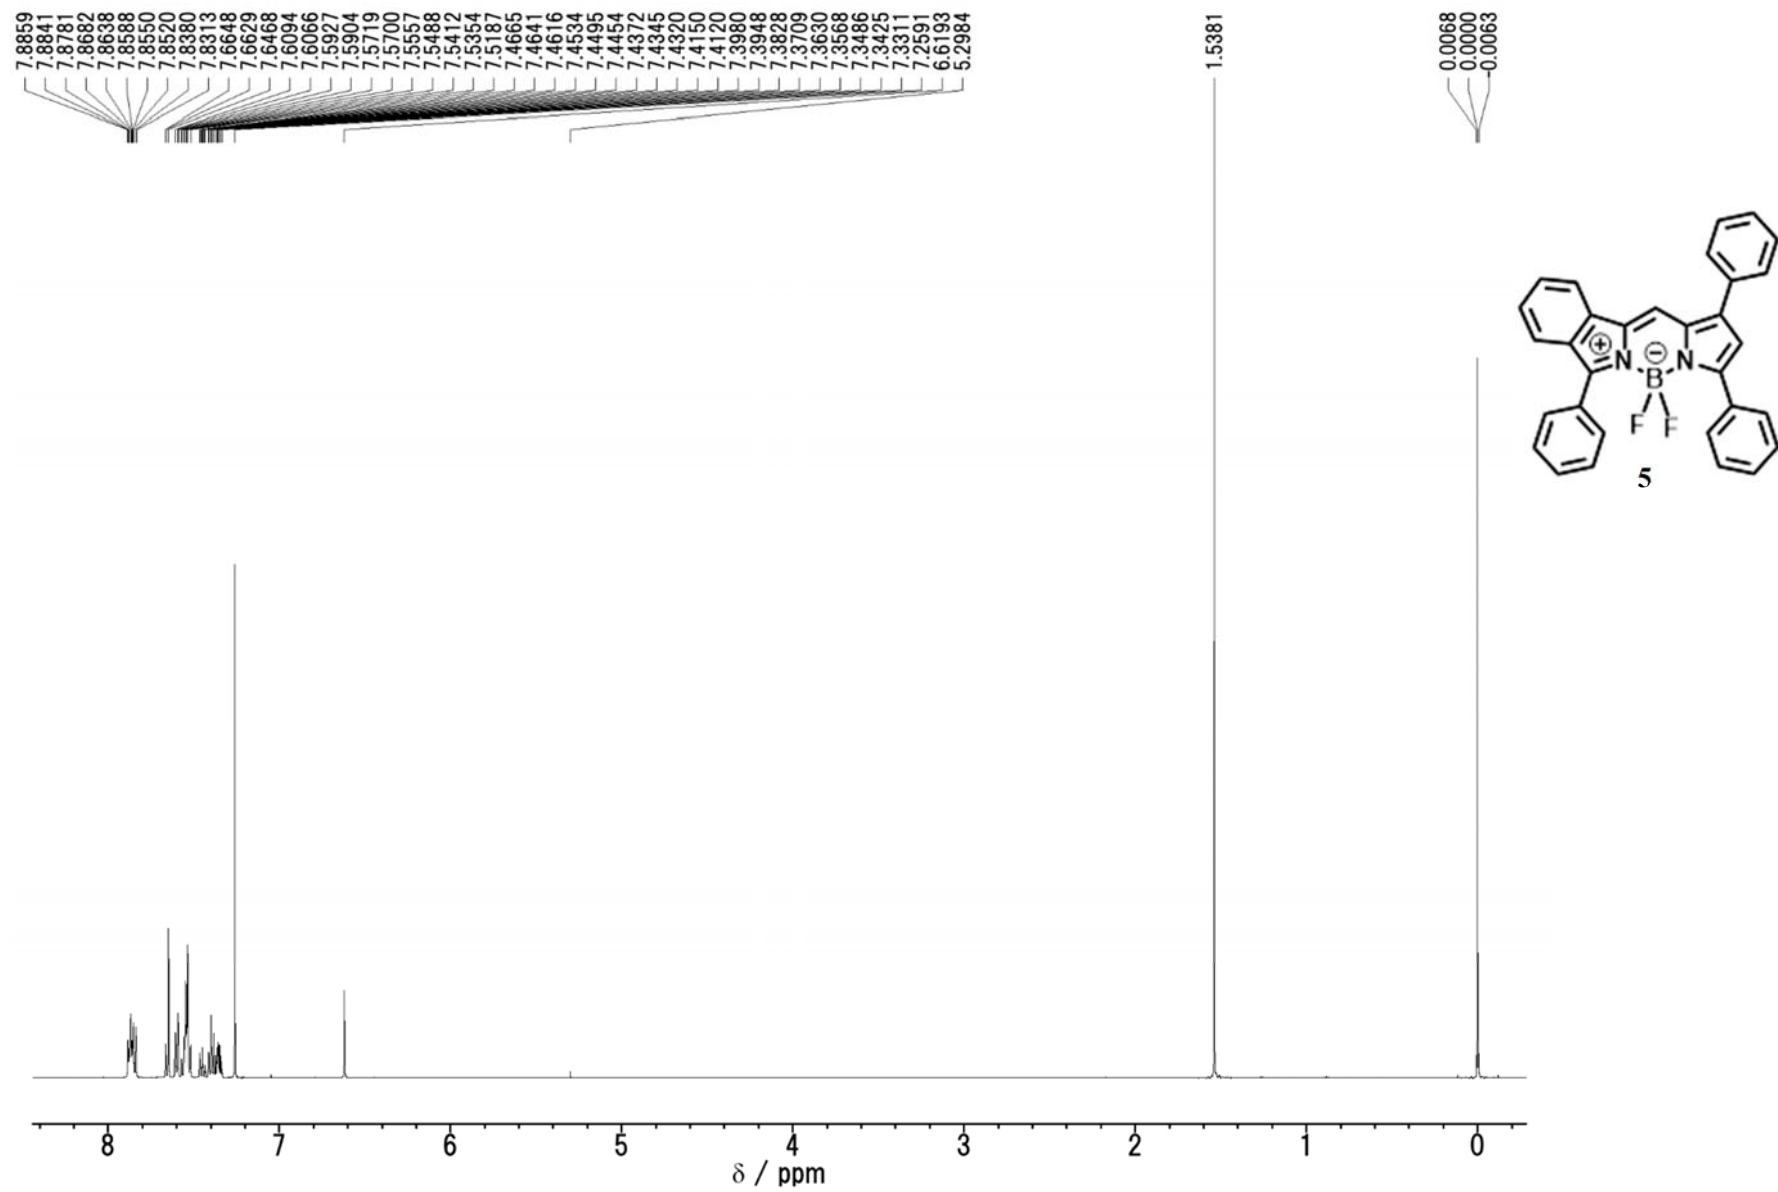

Fig. S37  $^1\text{H NMR}$  spectrum of **5** (500 MHz) in  $\text{CDCl}_3$ .

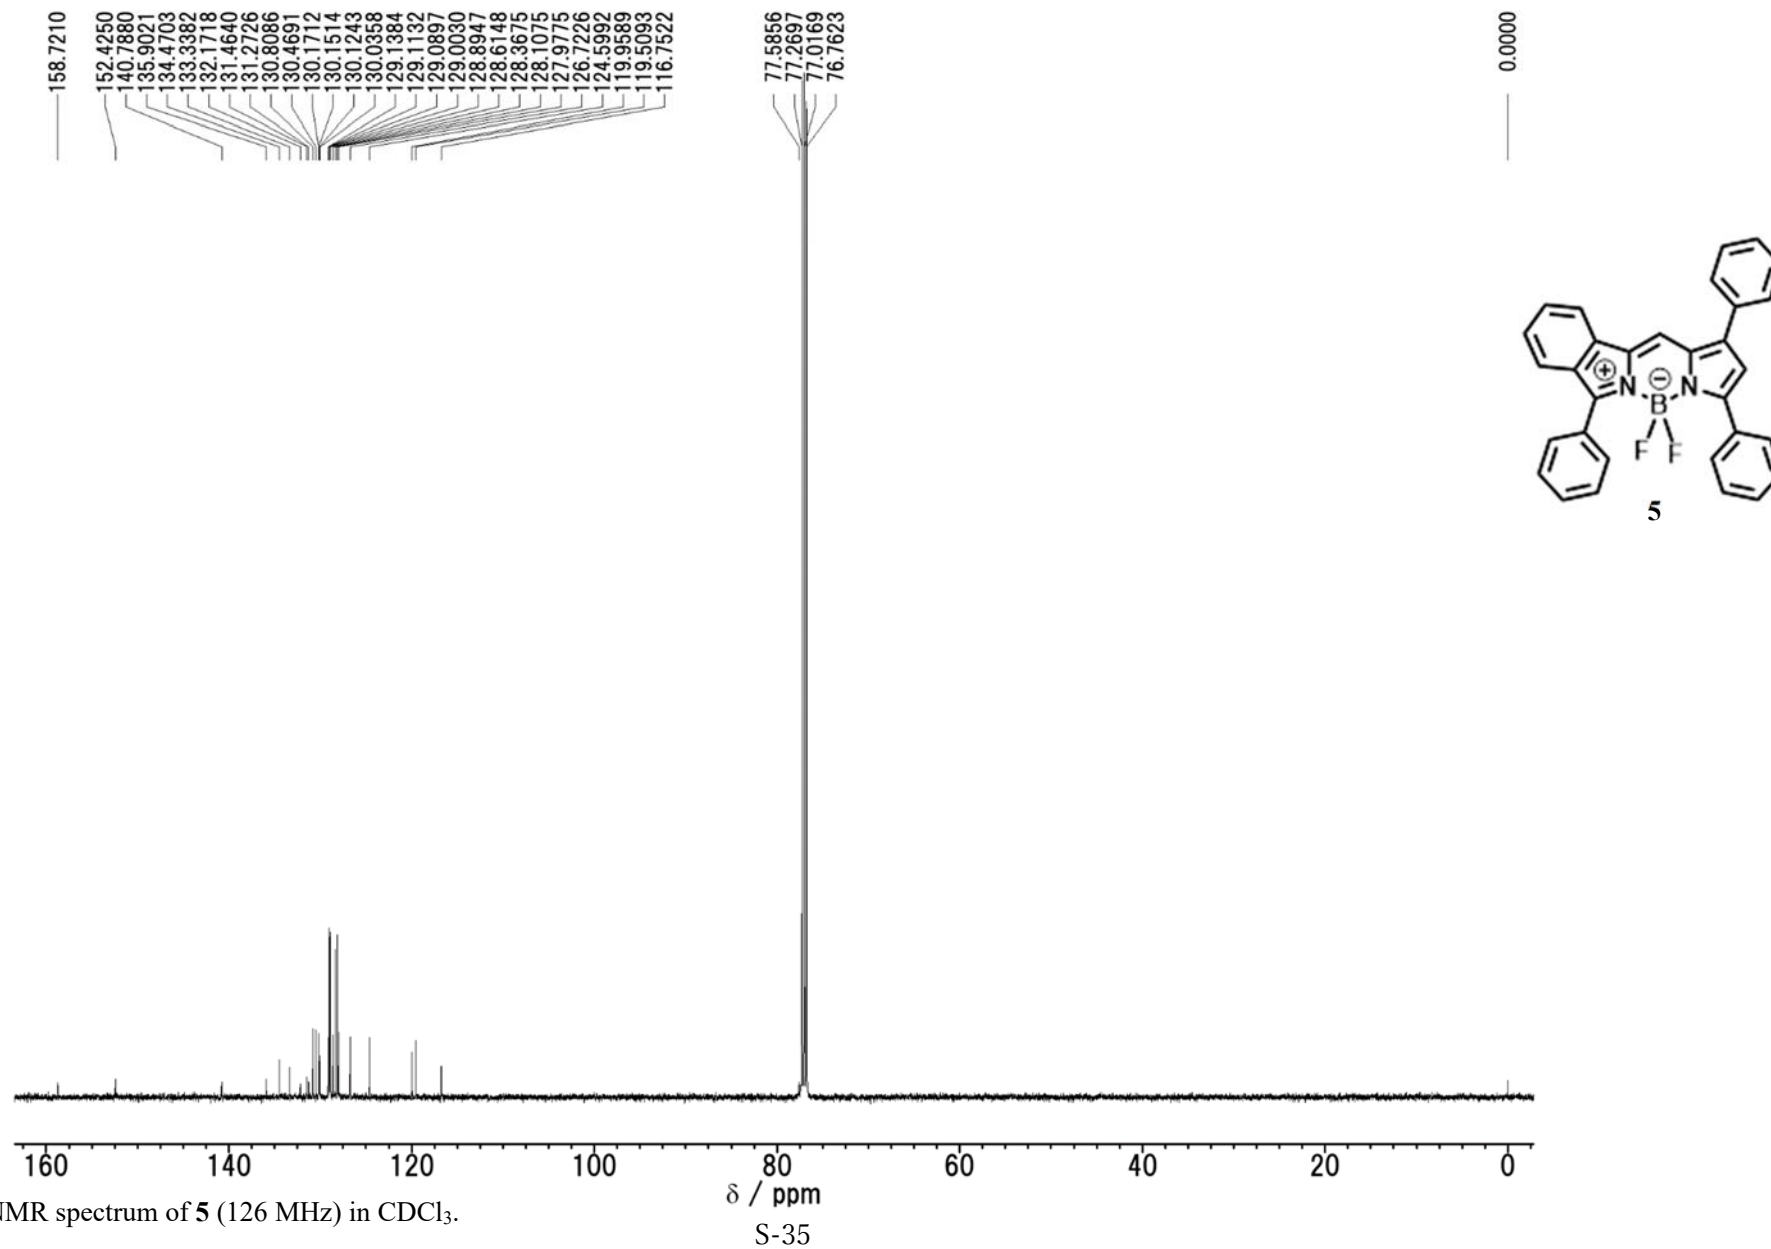

Fig. S38 <sup>13</sup>C NMR spectrum of **5** (126 MHz) in CDCl<sub>3</sub>.

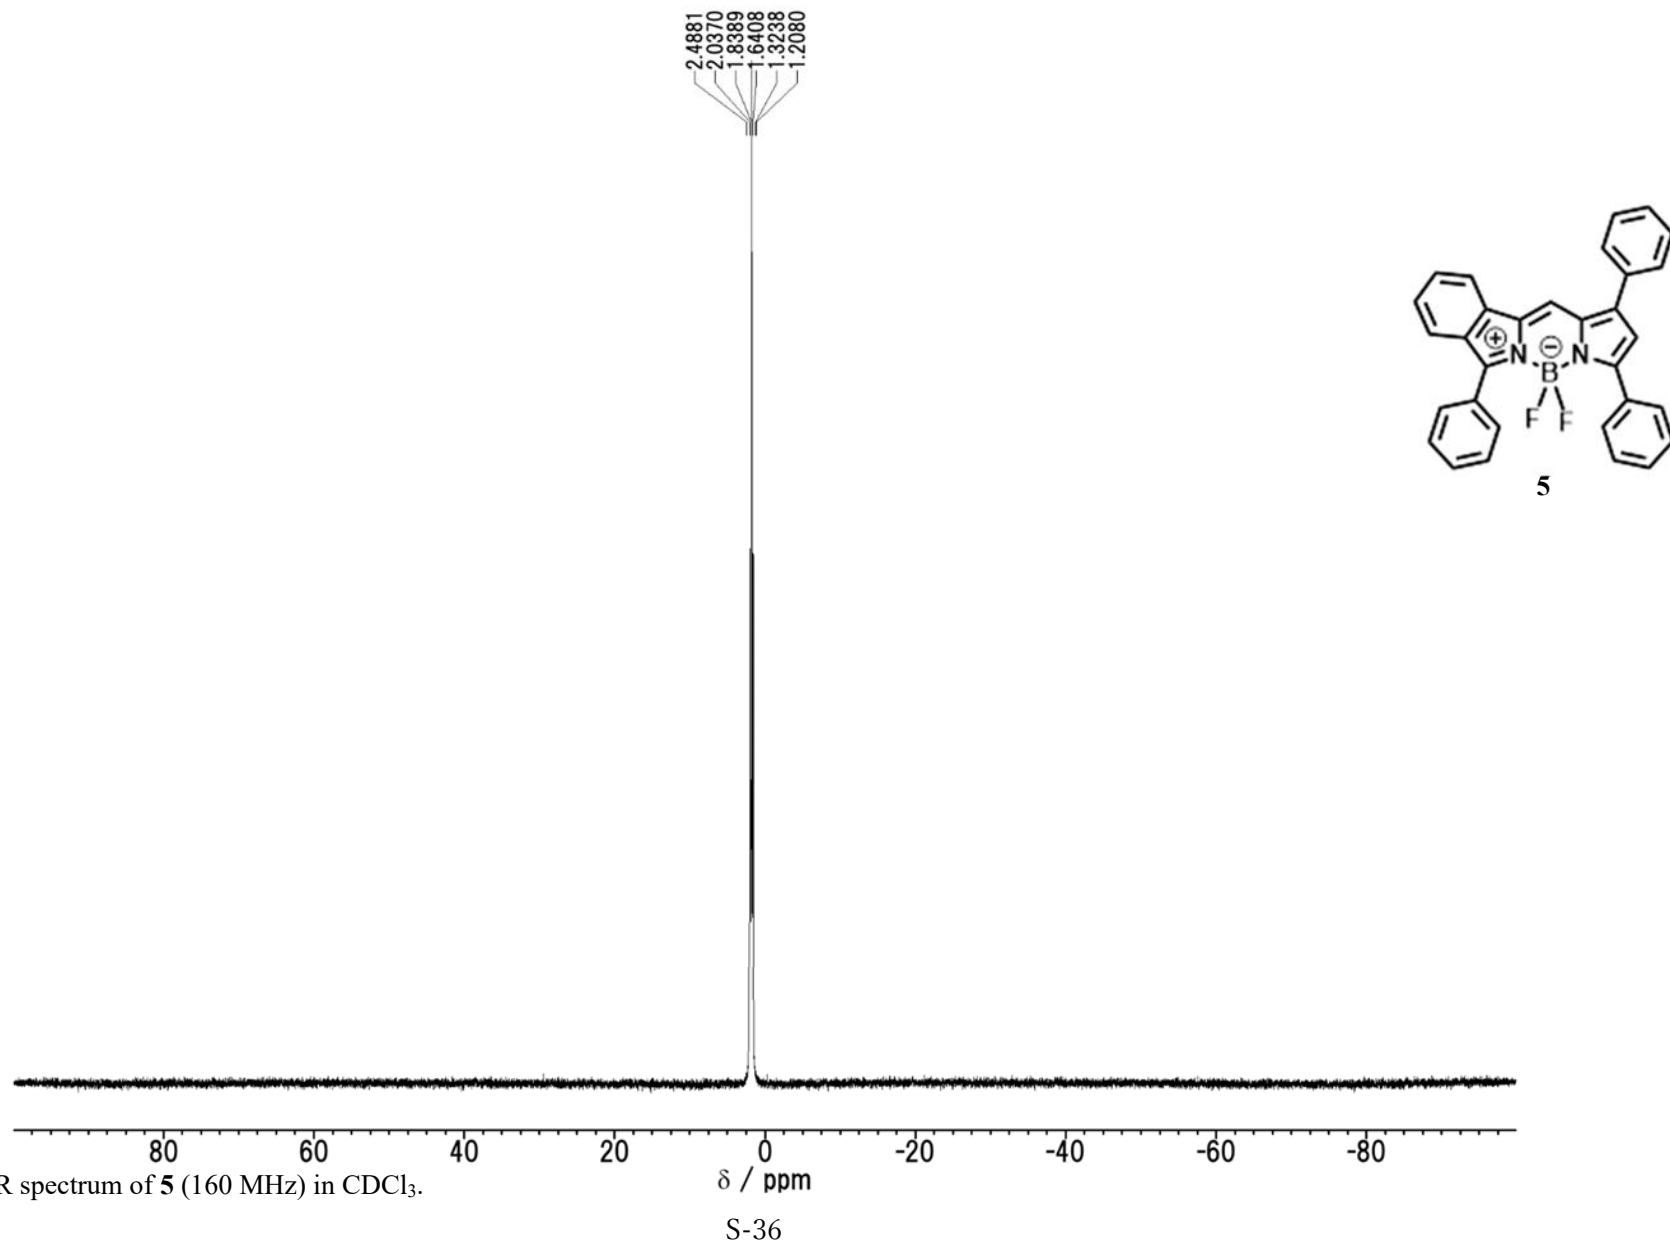

Fig. S39  $^{11}\text{B}$  NMR spectrum of **5** (160 MHz) in  $\text{CDCl}_3$ .

[ Mass Spectrum ]

Data : 190718-Nozawa EXP93-001 Date : 18-Jul-2019 19:48

Instrument : MStation

Sample : -

Inlet : Direct Ion Mode : FAB+

Spectrum Type : Normal Ion [MF-Linear]

Scan# : (3,8)

BP : m/z 154 Int. : 218.19 (2287872)

Output m/z range : 50 to 502 Cut Level : 0.00 %

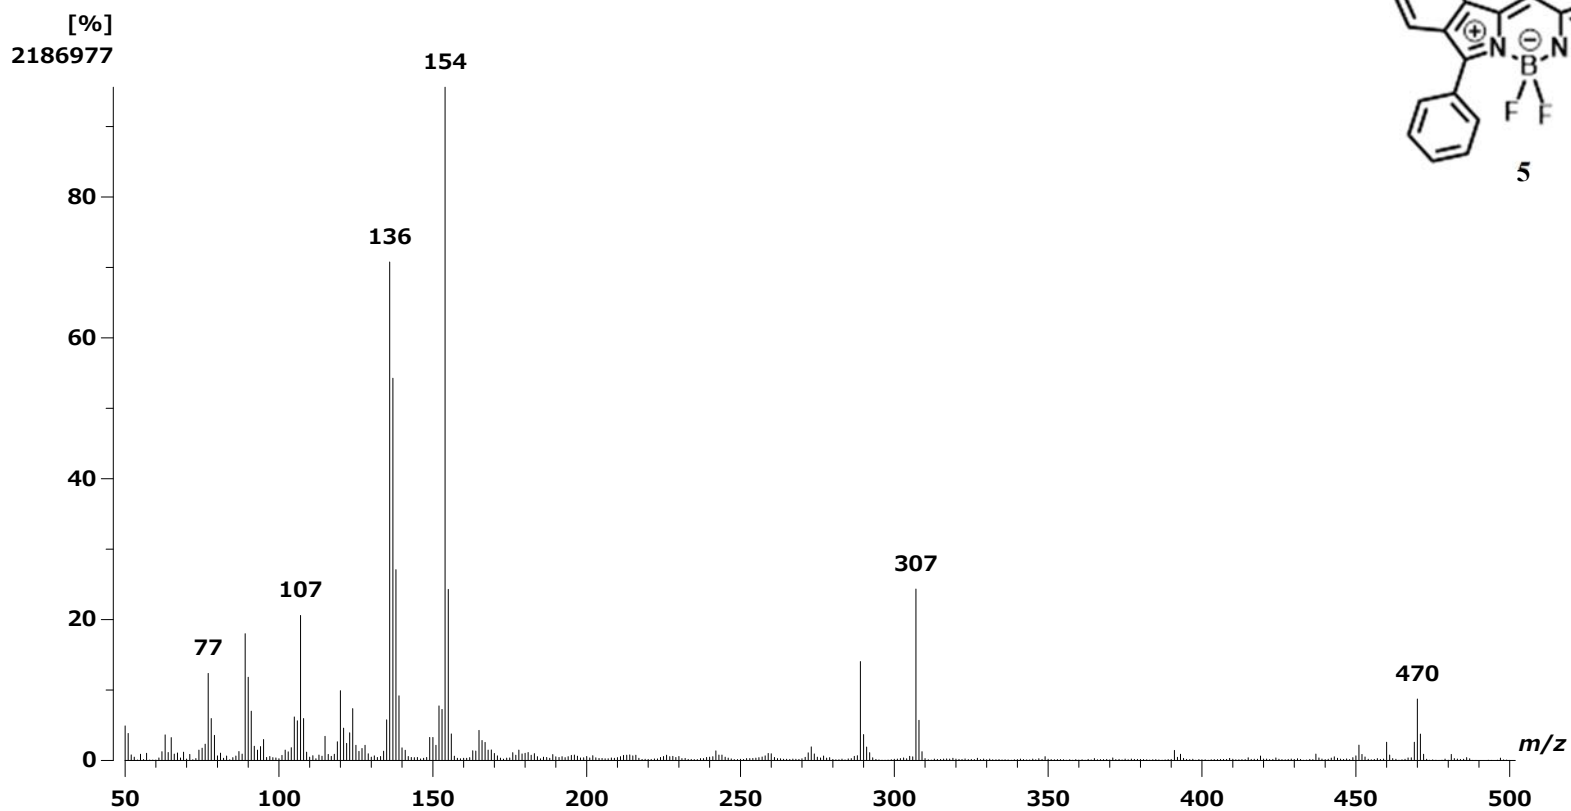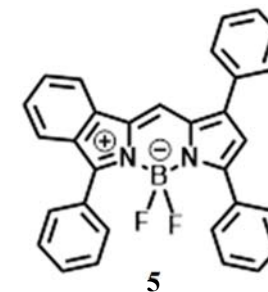

Fig. S40 FAB mass spectrum (positive mode) of 5.

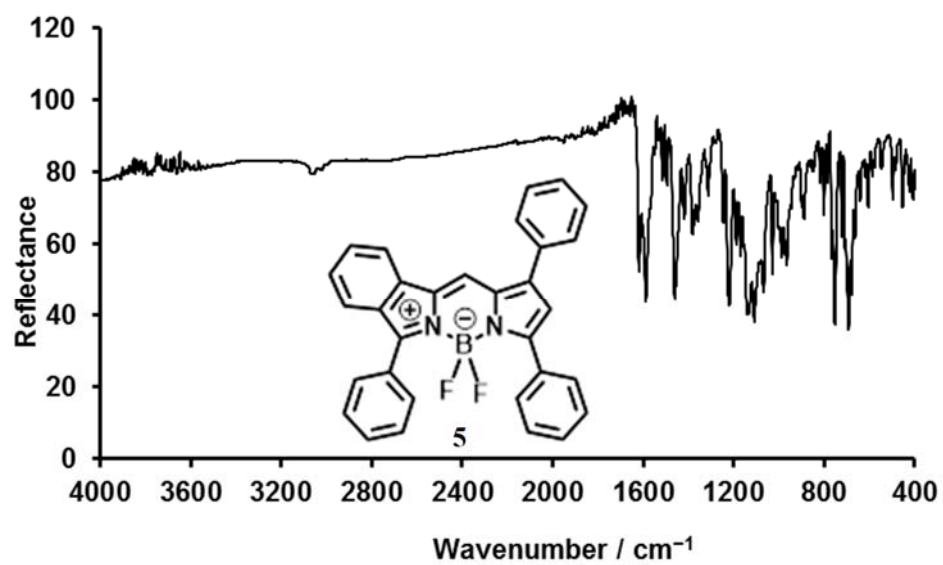

Fig. S41 ATR-FT-IR spectrum of 5.

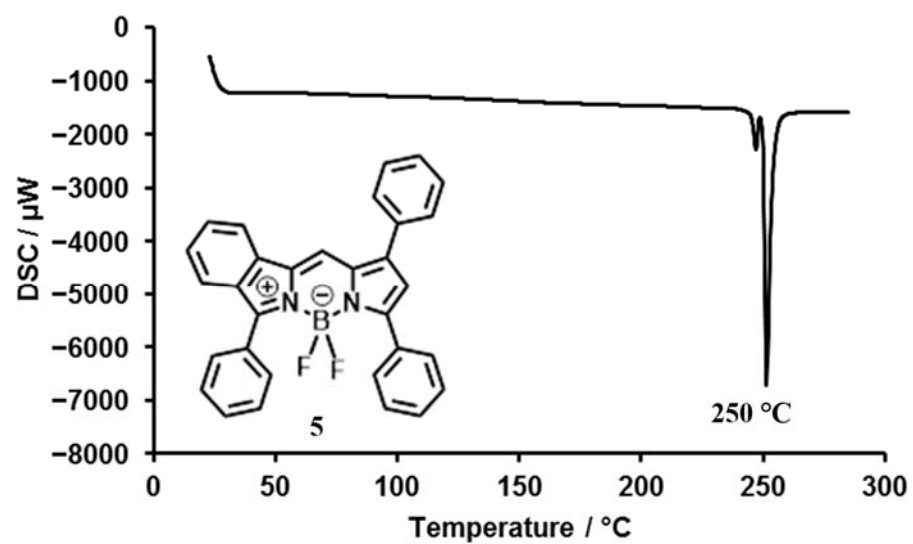

Fig. S42 DSC plots of 5.

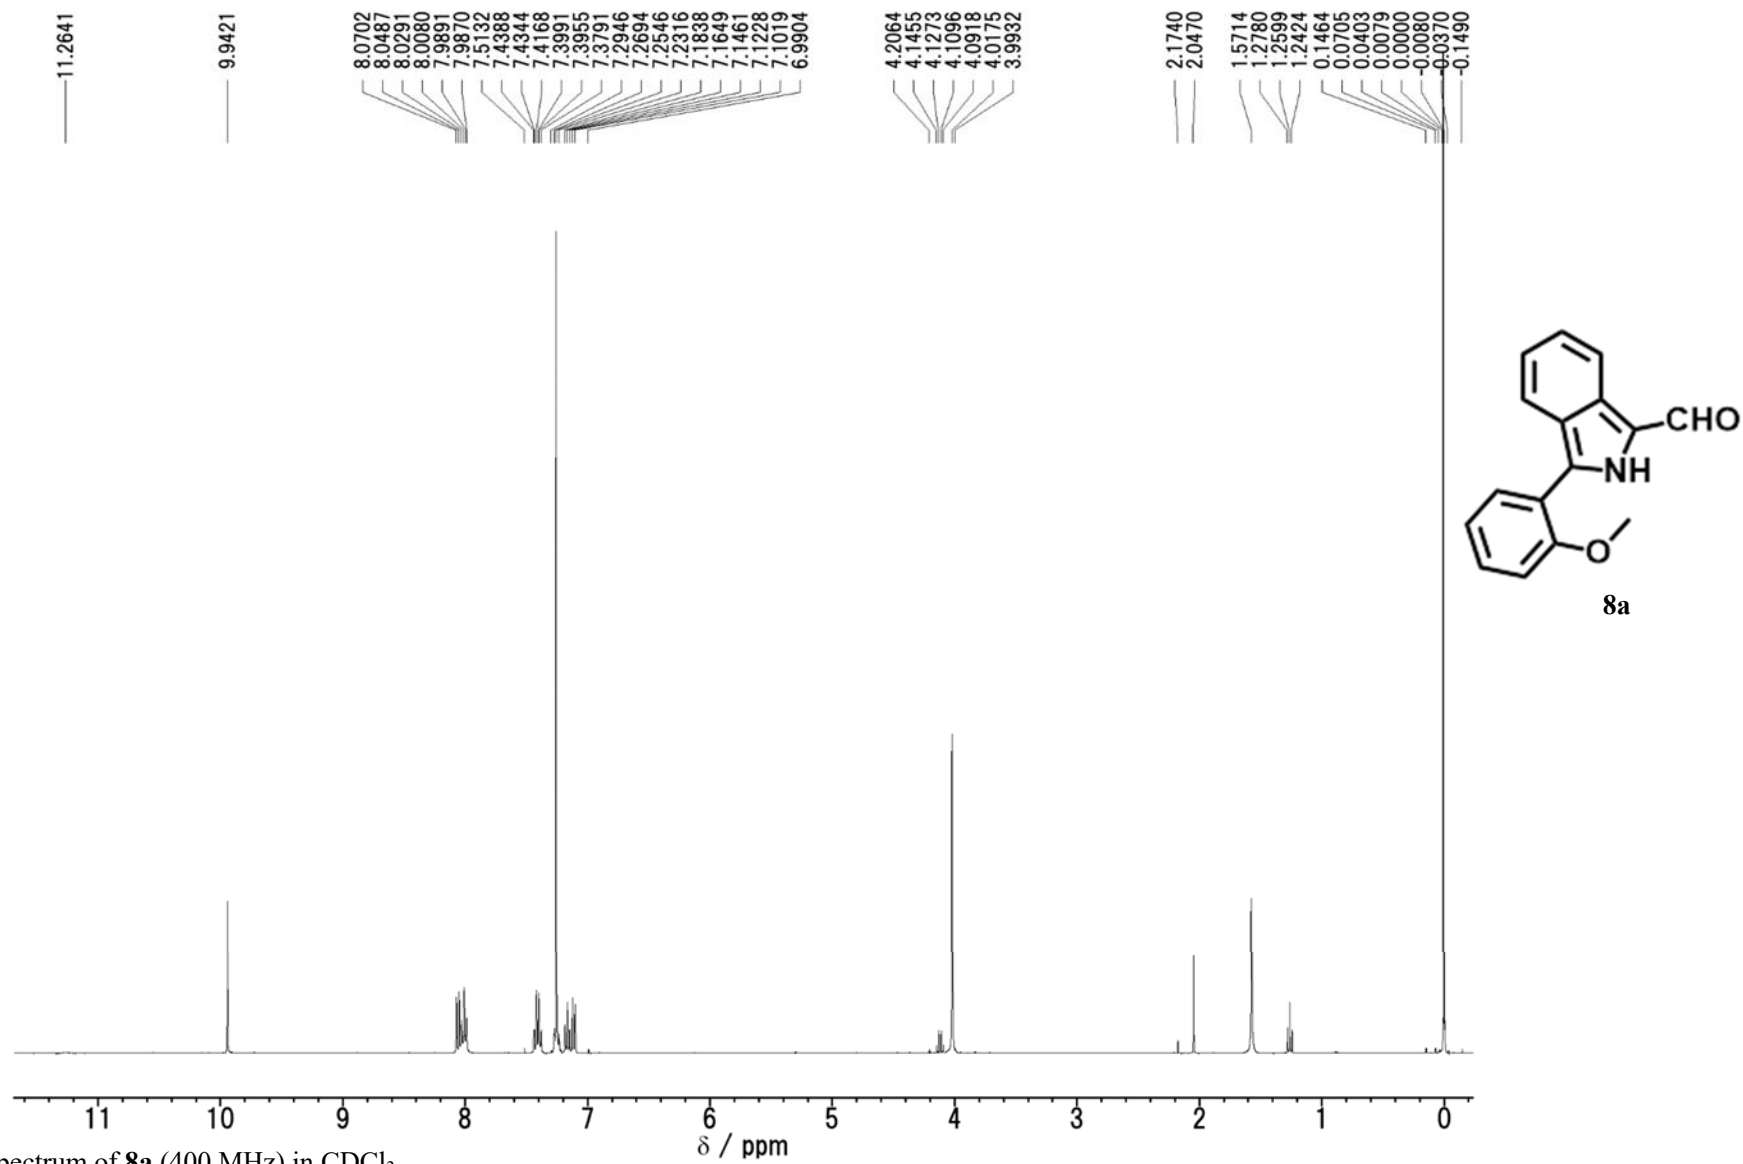

Fig. S43 <sup>1</sup>H NMR spectrum of **8a** (400 MHz) in CDCl<sub>3</sub>.

[ Mass Spectrum ]

Data : 180825- nozawaEXP28 -001     Date : 25-Aug-2018 17:43

Instrument : MStation

Sample : -

Inlet : Direct     Ion Mode : FAB+

Spectrum Type : Normal Ion [MF-Linear]

Scan# : (2,5)

BP : m/z 251     Int. : 12.02 (126041)

Output m/z range : 50 to 277     Cut Level : 0.00 %

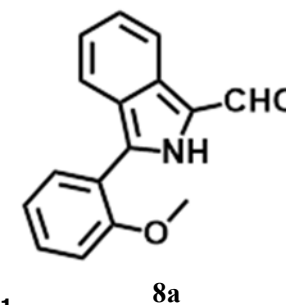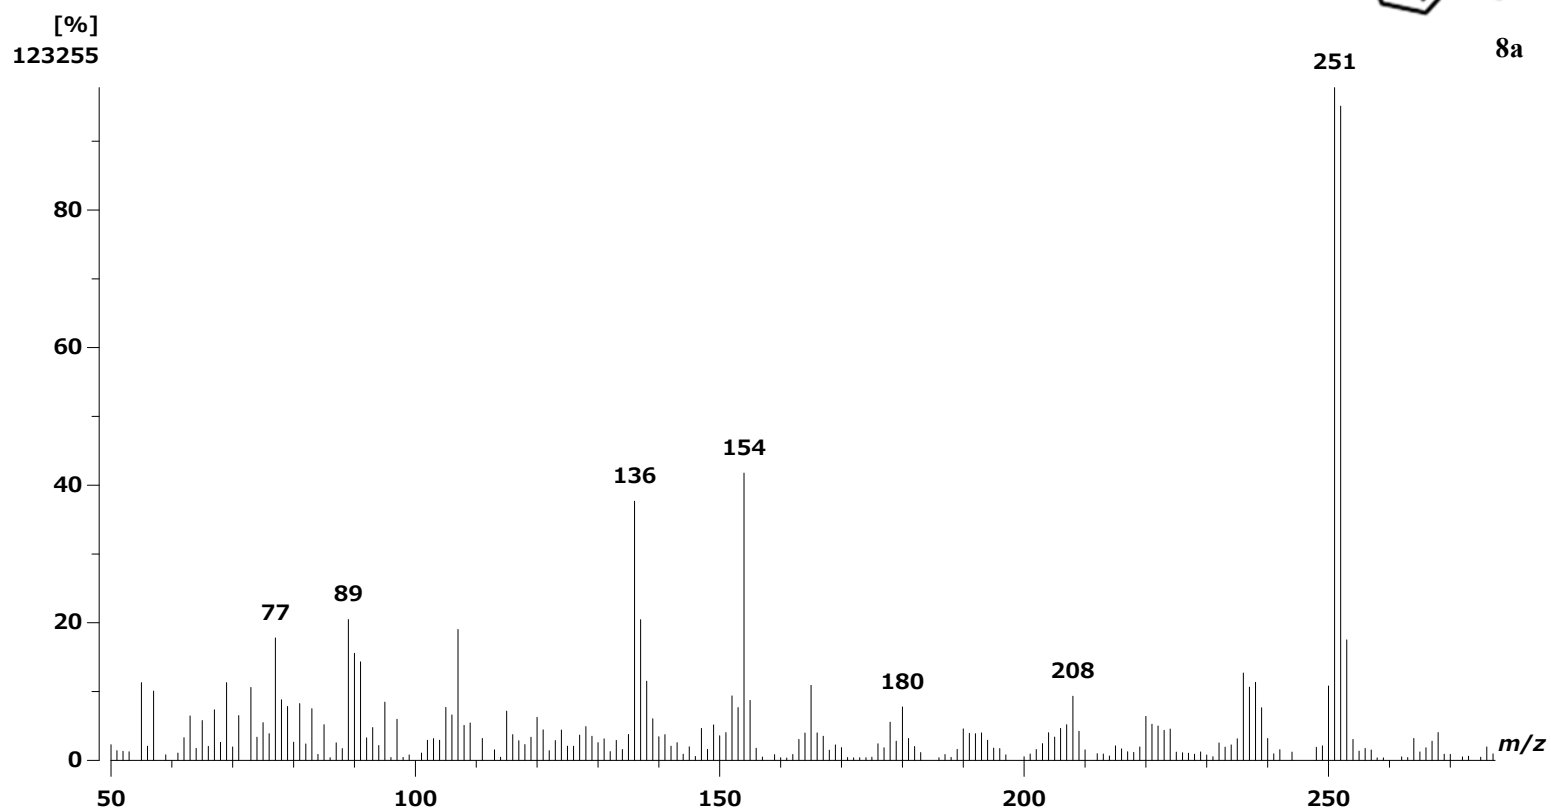

Fig. S44 FAB mass spectrum (positive mode) of 8a.



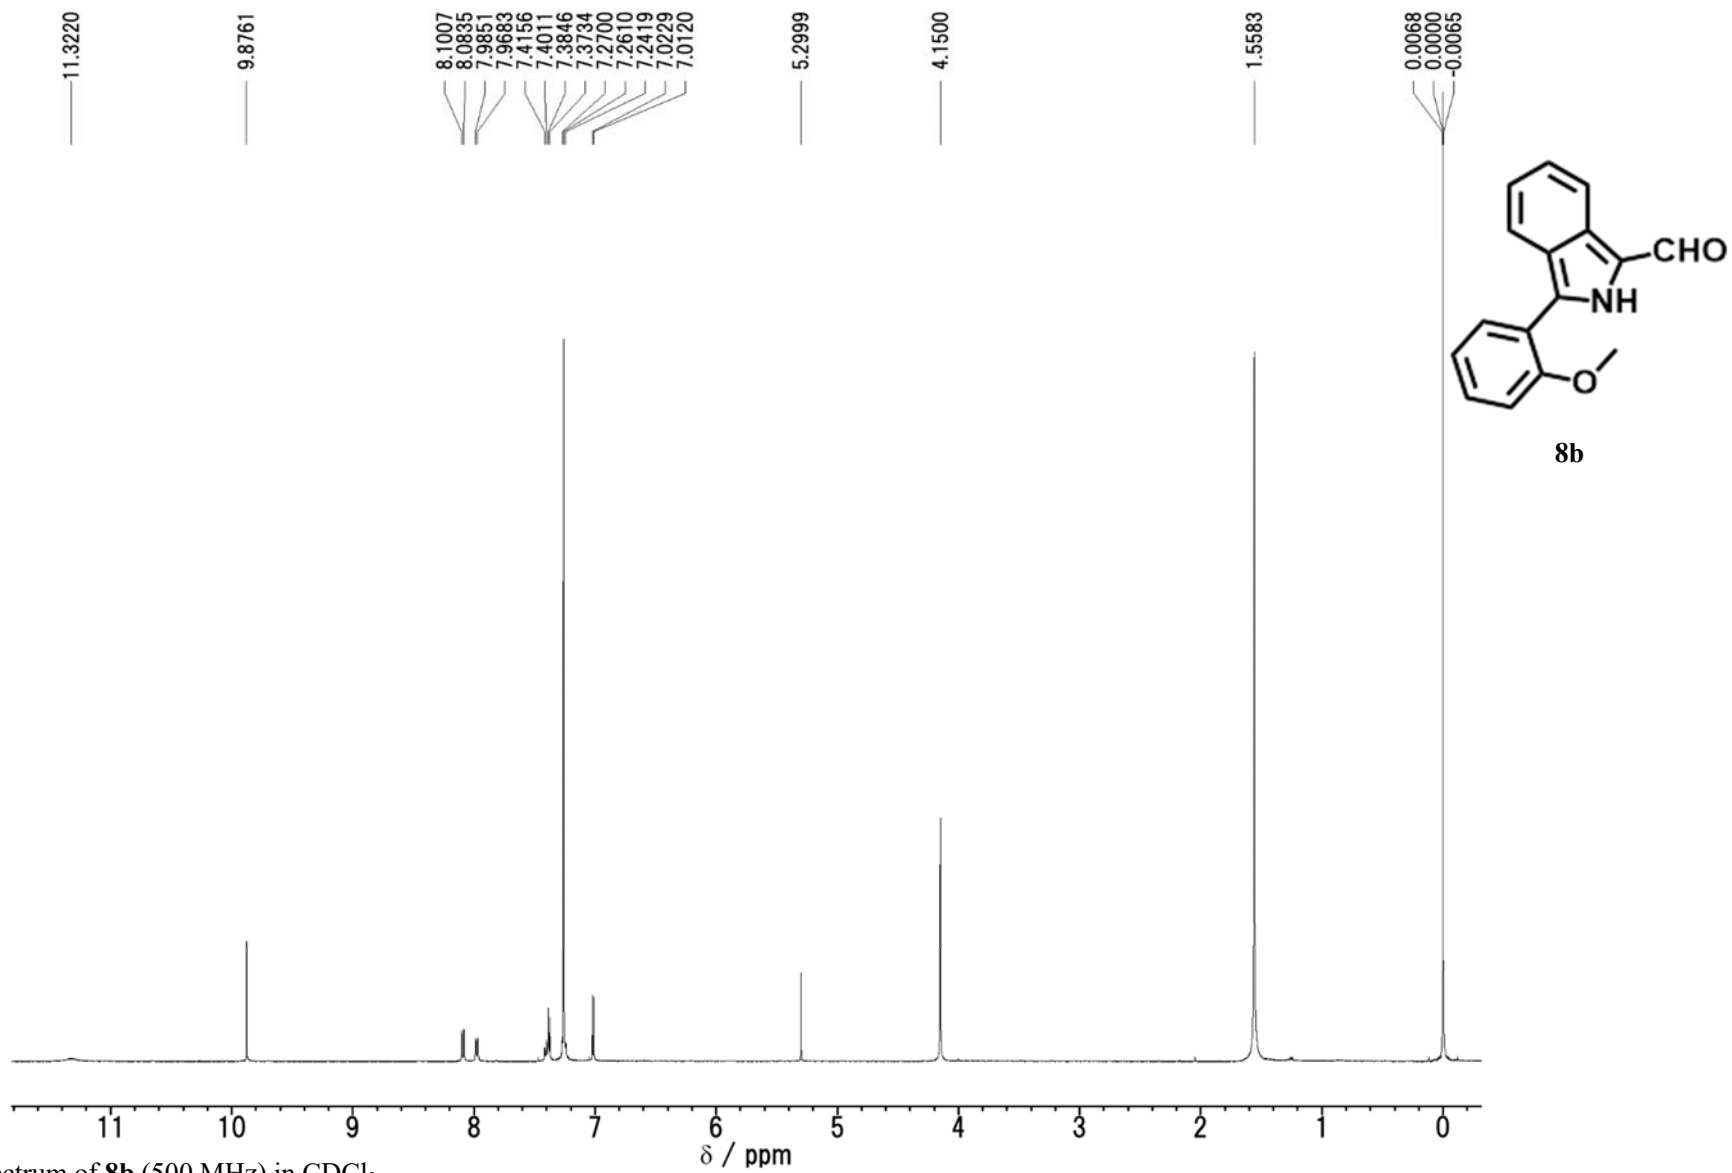

Fig. S45  $^1\text{H}$  NMR spectrum of **8b** (500 MHz) in  $\text{CDCl}_3$ .

[ Mass Spectrum ]

Data : 20180719-nozawaEXP20\_Frc3-001 Date : 19-Jul-2018 15:46

Instrument : MStation

Sample : -

Inlet : Direct Ion Mode : FAB+

Spectrum Type : Normal Ion [MF-Linear]

Scan# : (4,8)

BP : m/z 69 Int. : 1.39 (14565)

Output m/z range : 50 to 286 Cut Level : 0.00 %

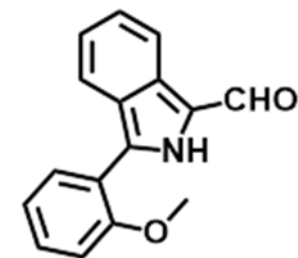

8b

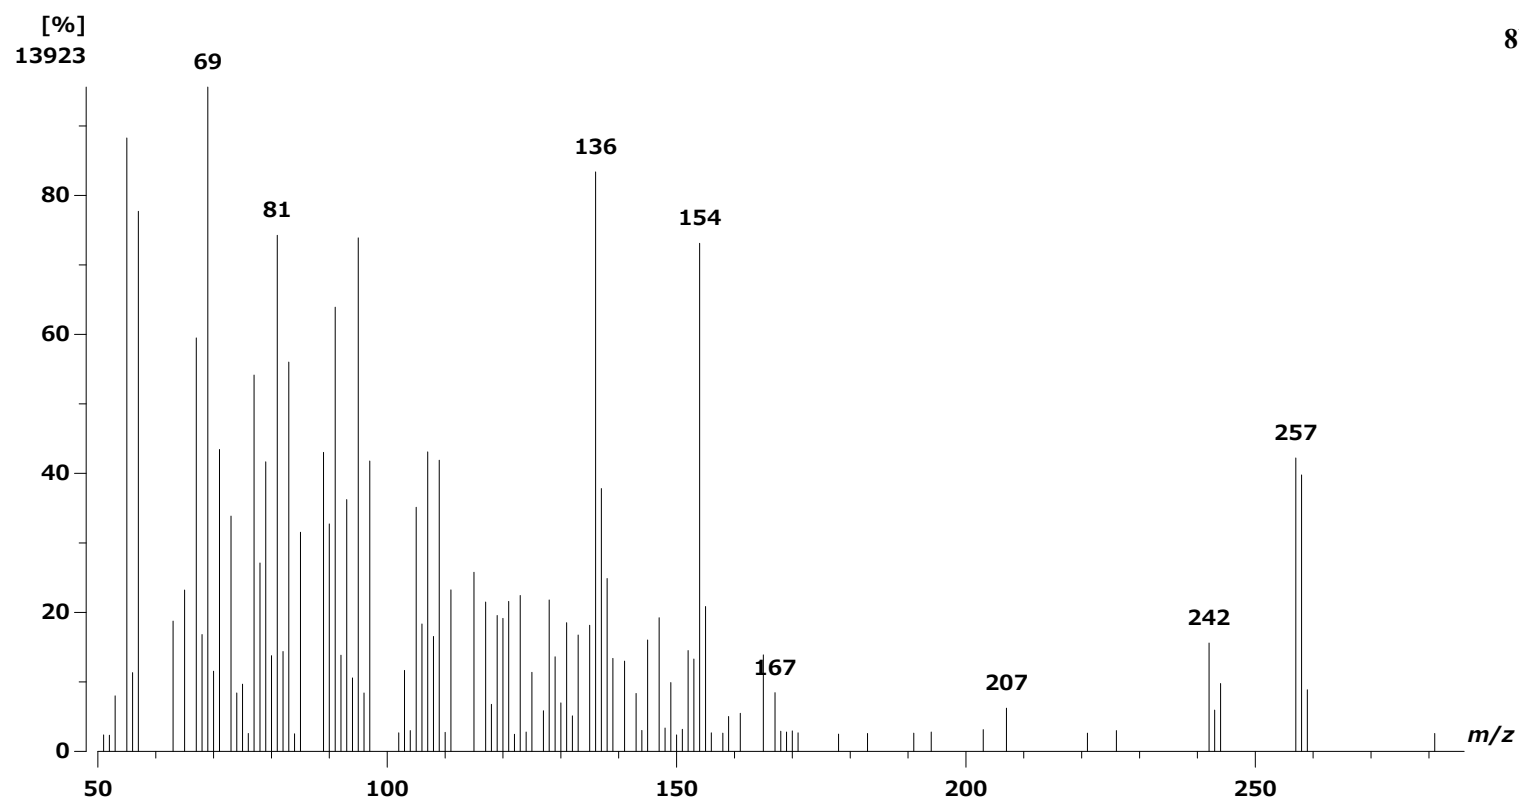

Fig. S46 FAB mass spectrum (positive mode) of **8b**.

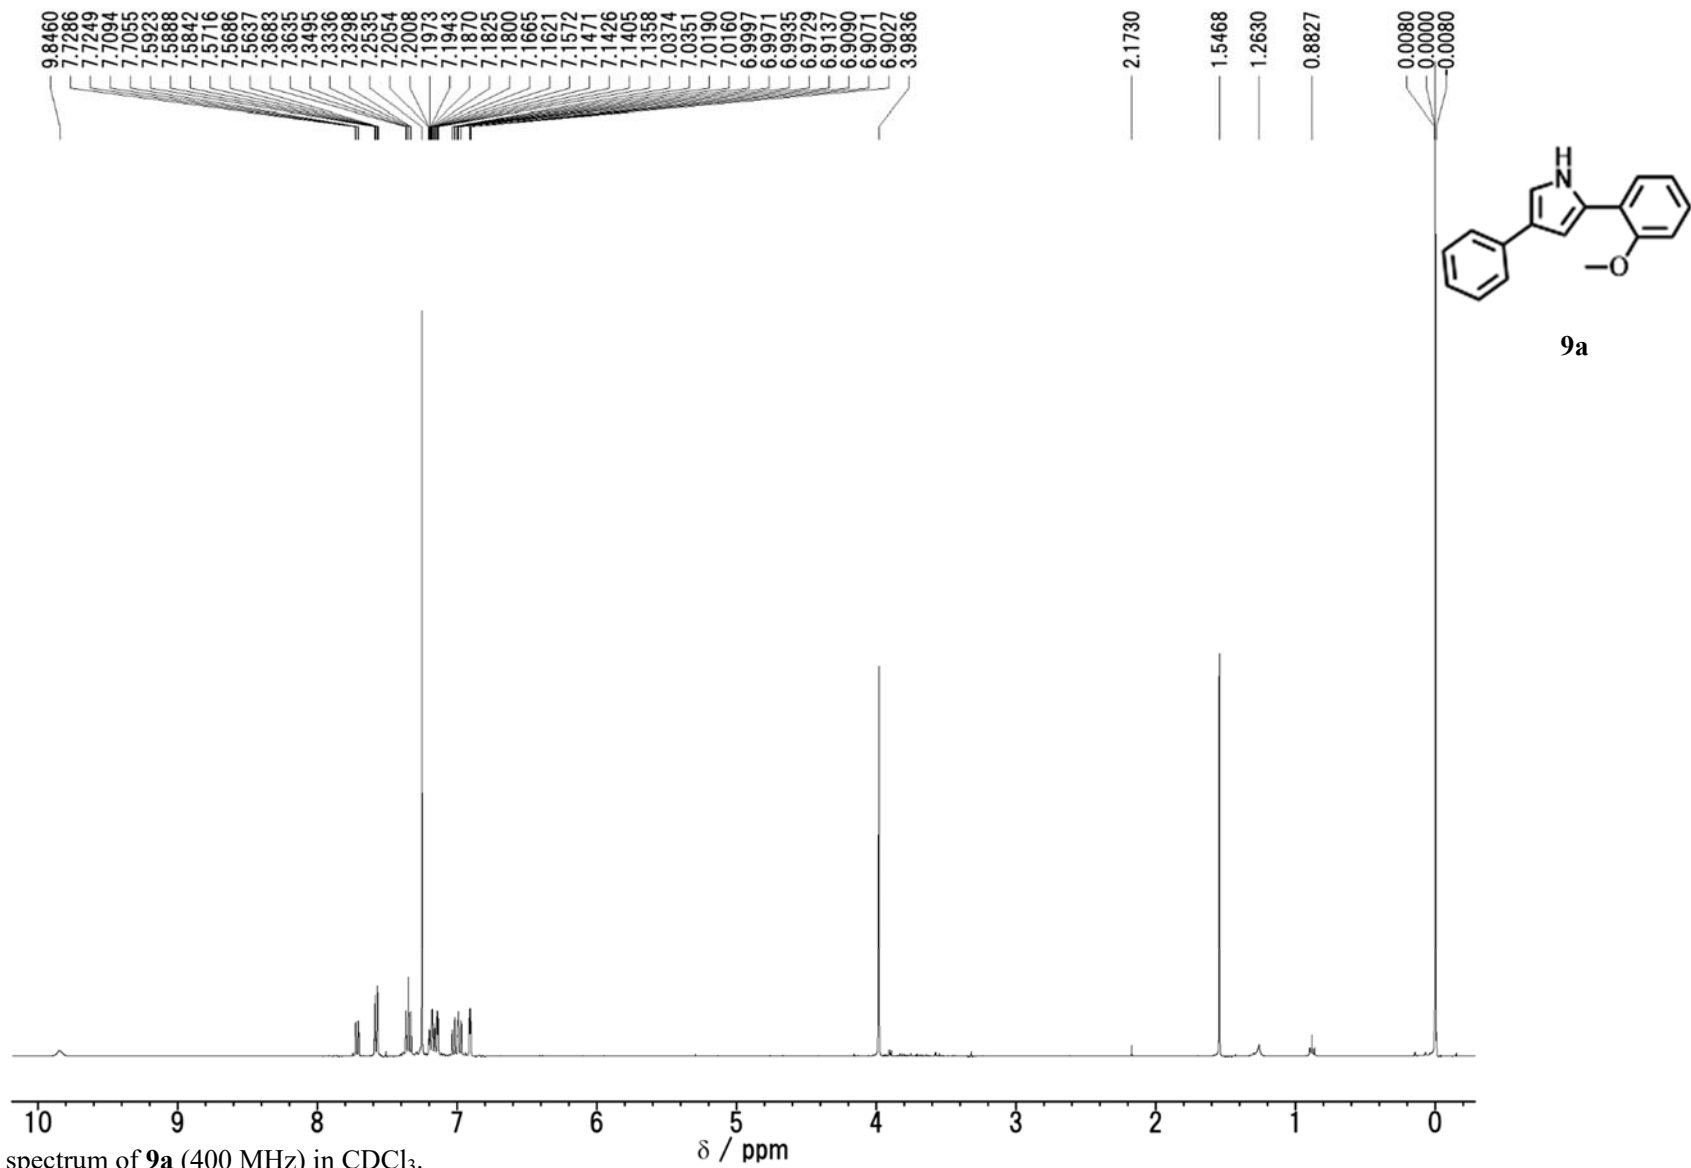

Fig. S47  $^1\text{H}$  NMR spectrum of **9a** (400 MHz) in  $\text{CDCl}_3$ .

[ Mass Spectrum ]

Data : 20181124-nozawaEXP43-001    Date : 25-Nov-2018 02:50

Instrument : MStation

Sample : -

Inlet : Direct    Ion Mode : FAB+

Spectrum Type : Normal Ion [MF-Linear]

Scan# : (2,4)

BP : m/z 249    Int. : 109.69 (1150165)

Output m/z range : 50 to 371    Cut Level : 0.00 %

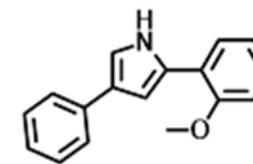

9a

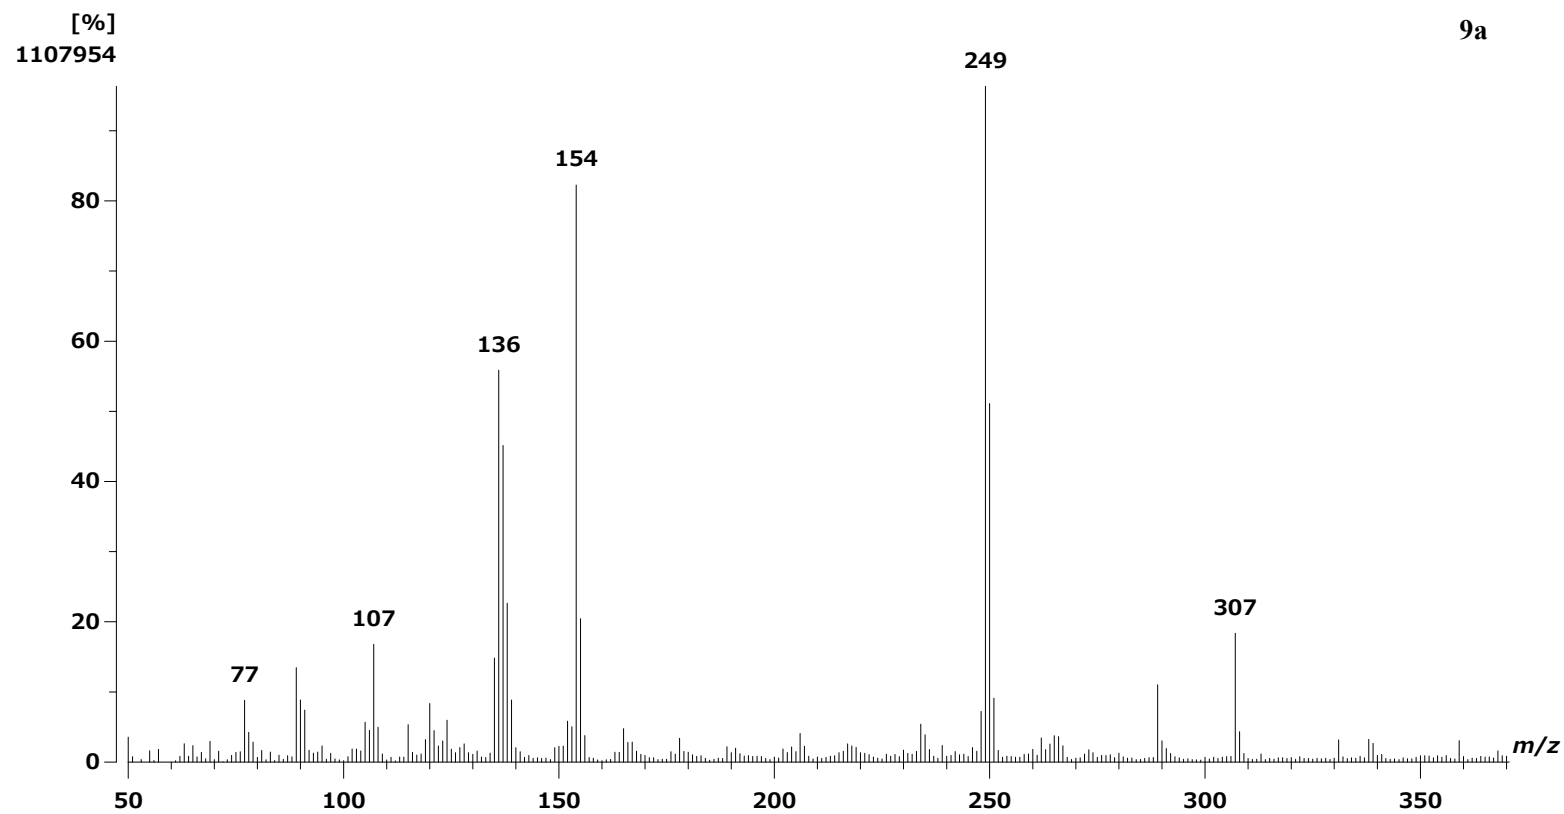

Fig. S48 FAB mass spectrum (positive mode) of 9a.

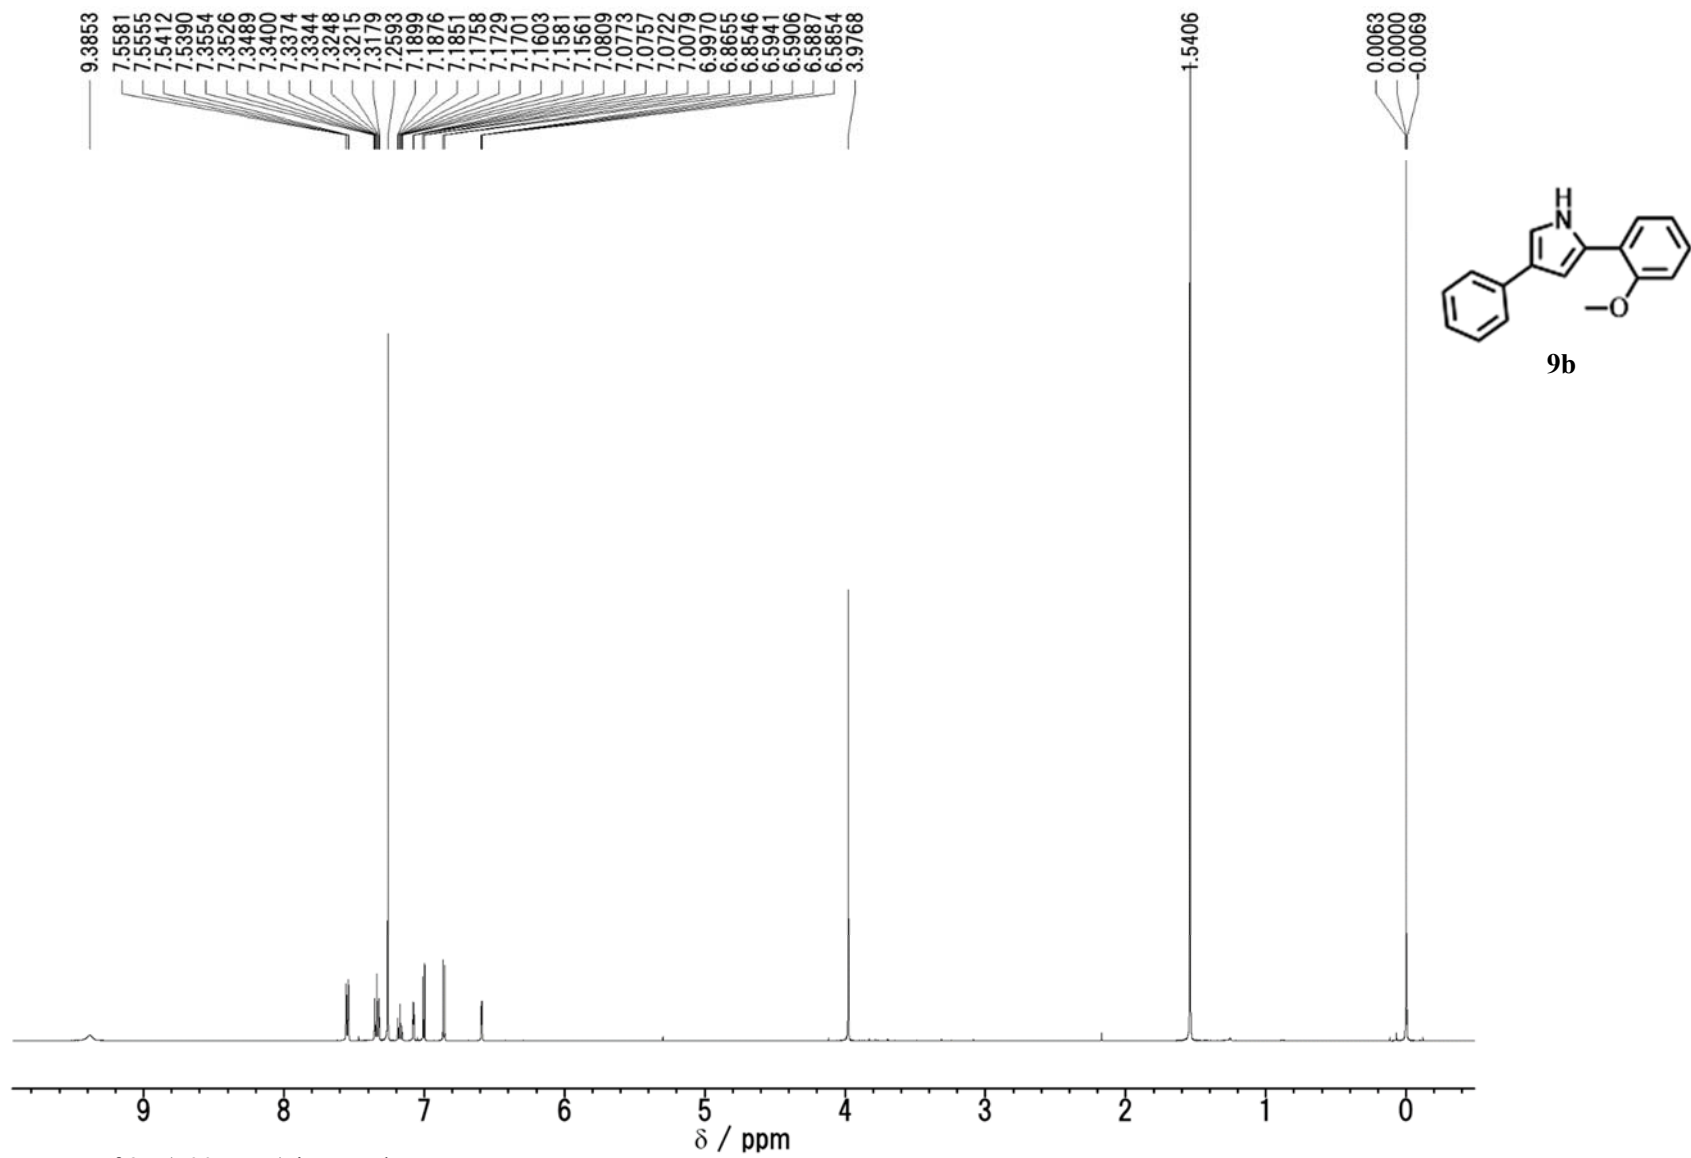

Fig. S49 <sup>1</sup>H NMR spectrum of **9b** (500 MHz) in CDCl<sub>3</sub>.

[ Mass Spectrum ]

Data : 180603- EXP137 -001    Date : 03-Jun-2018 16:48

Instrument : MStation

Sample : -

Inlet : Direct    Ion Mode : FAB+

Spectrum Type : Normal Ion [MF-Linear]

Scan# : (2,3)

BP : m/z 255    Int. : 87.14 (913704)

Output m/z range : 50 to 269    Cut Level : 0.00 %

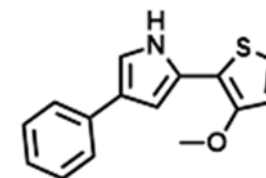

9b

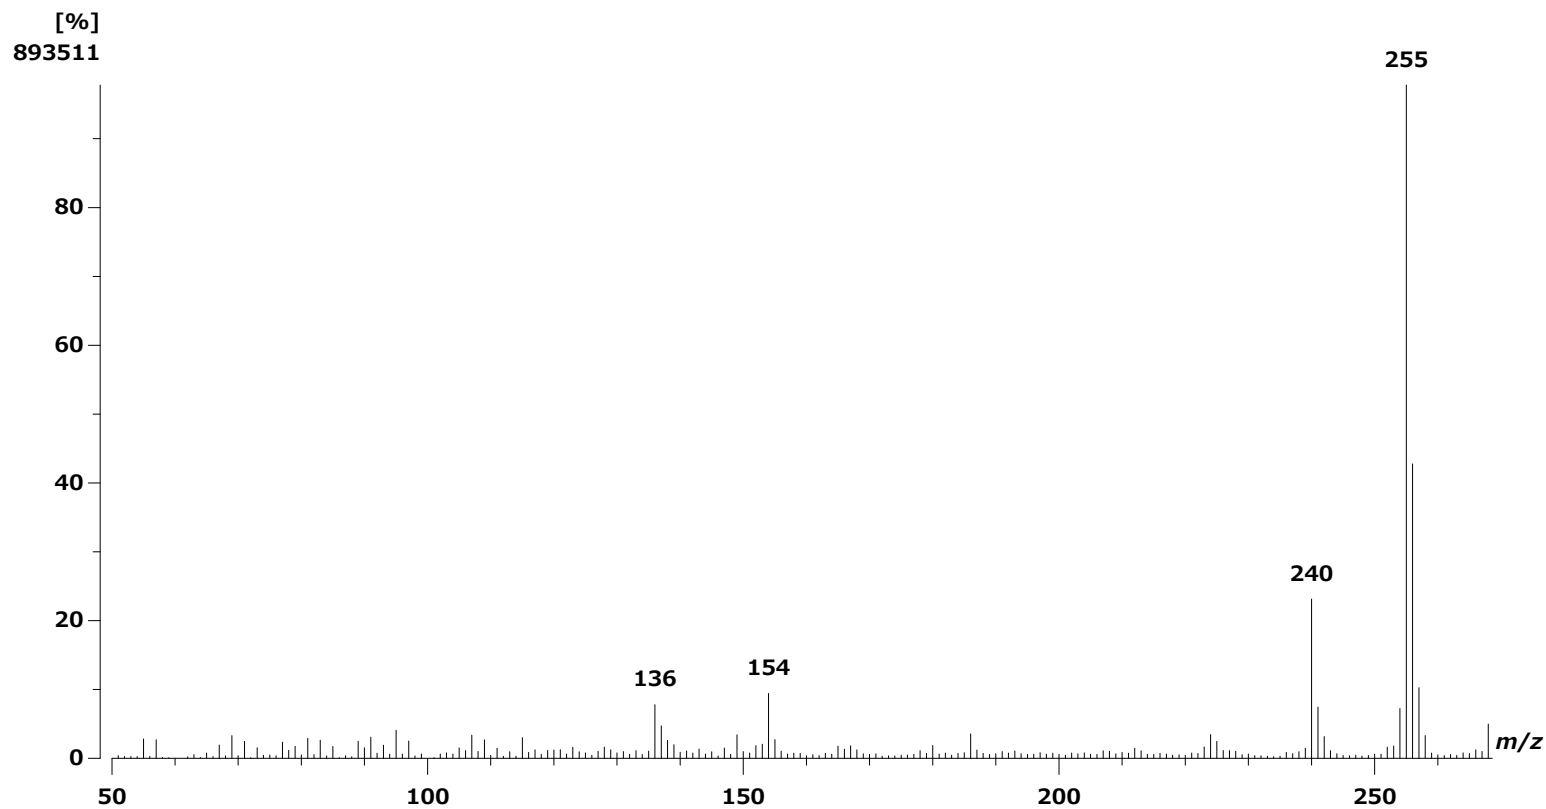

Fig. S50 FAB mass spectrum (positive mode) of 9b.

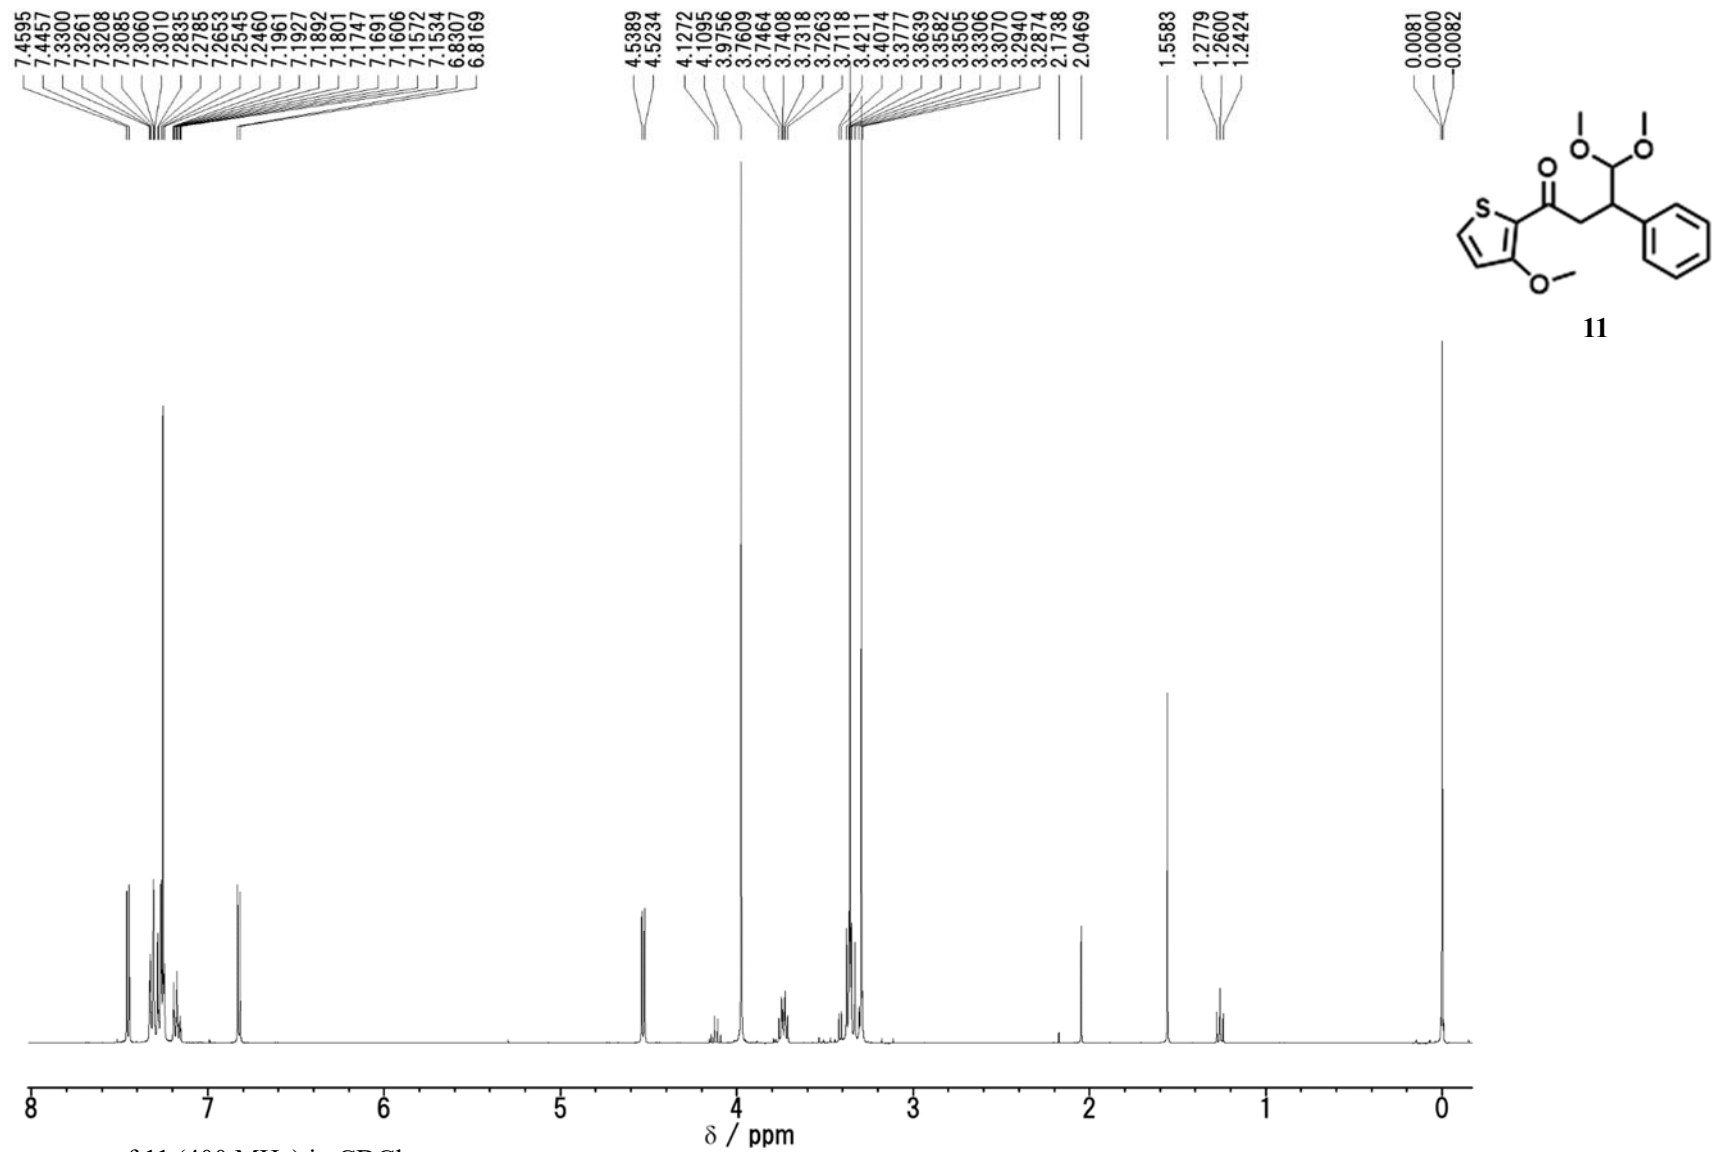

Fig. S51  $^1\text{H}$  NMR spectrum of **11** (400 MHz) in  $\text{CDCl}_3$ .

[ Mass Spectrum ]

Data : 20180531\_shimada\_EXP84-001    Date : 31-May-2018 15:32

Instrument : MStation

Sample : -

Inlet : Direct    Ion Mode : FAB+

Spectrum Type : Normal Ion [MF-Linear]

Scan# : (2,3)

BP : m/z 289    Int. : 70.63 (740568)

Output m/z range : 50 to 315    Cut Level : 0.00 %

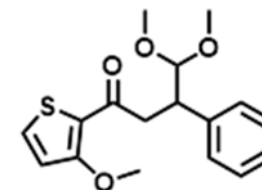

11

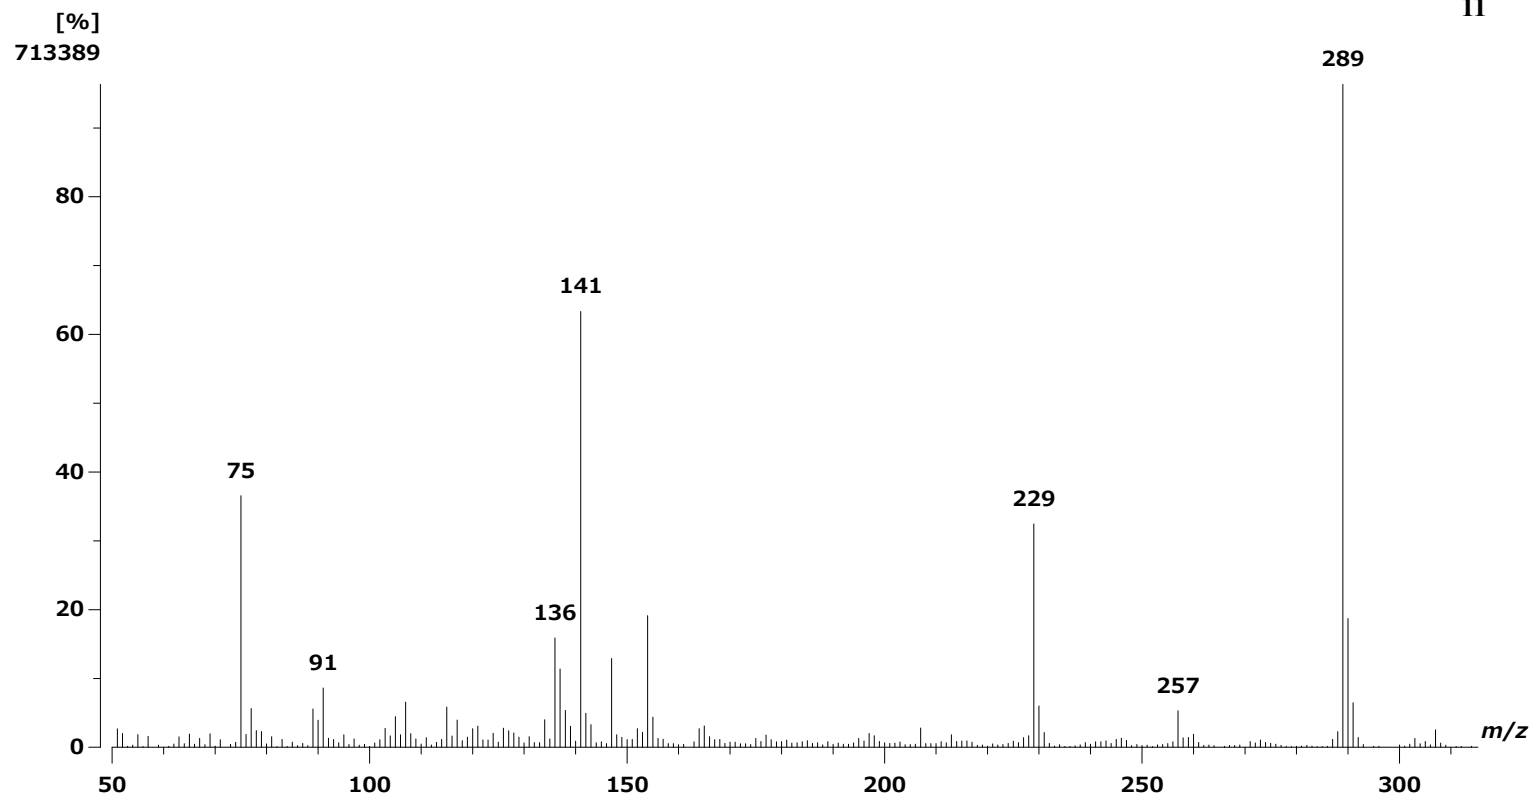

Fig. S52 FAB mass spectrum (positive mode) of 11.



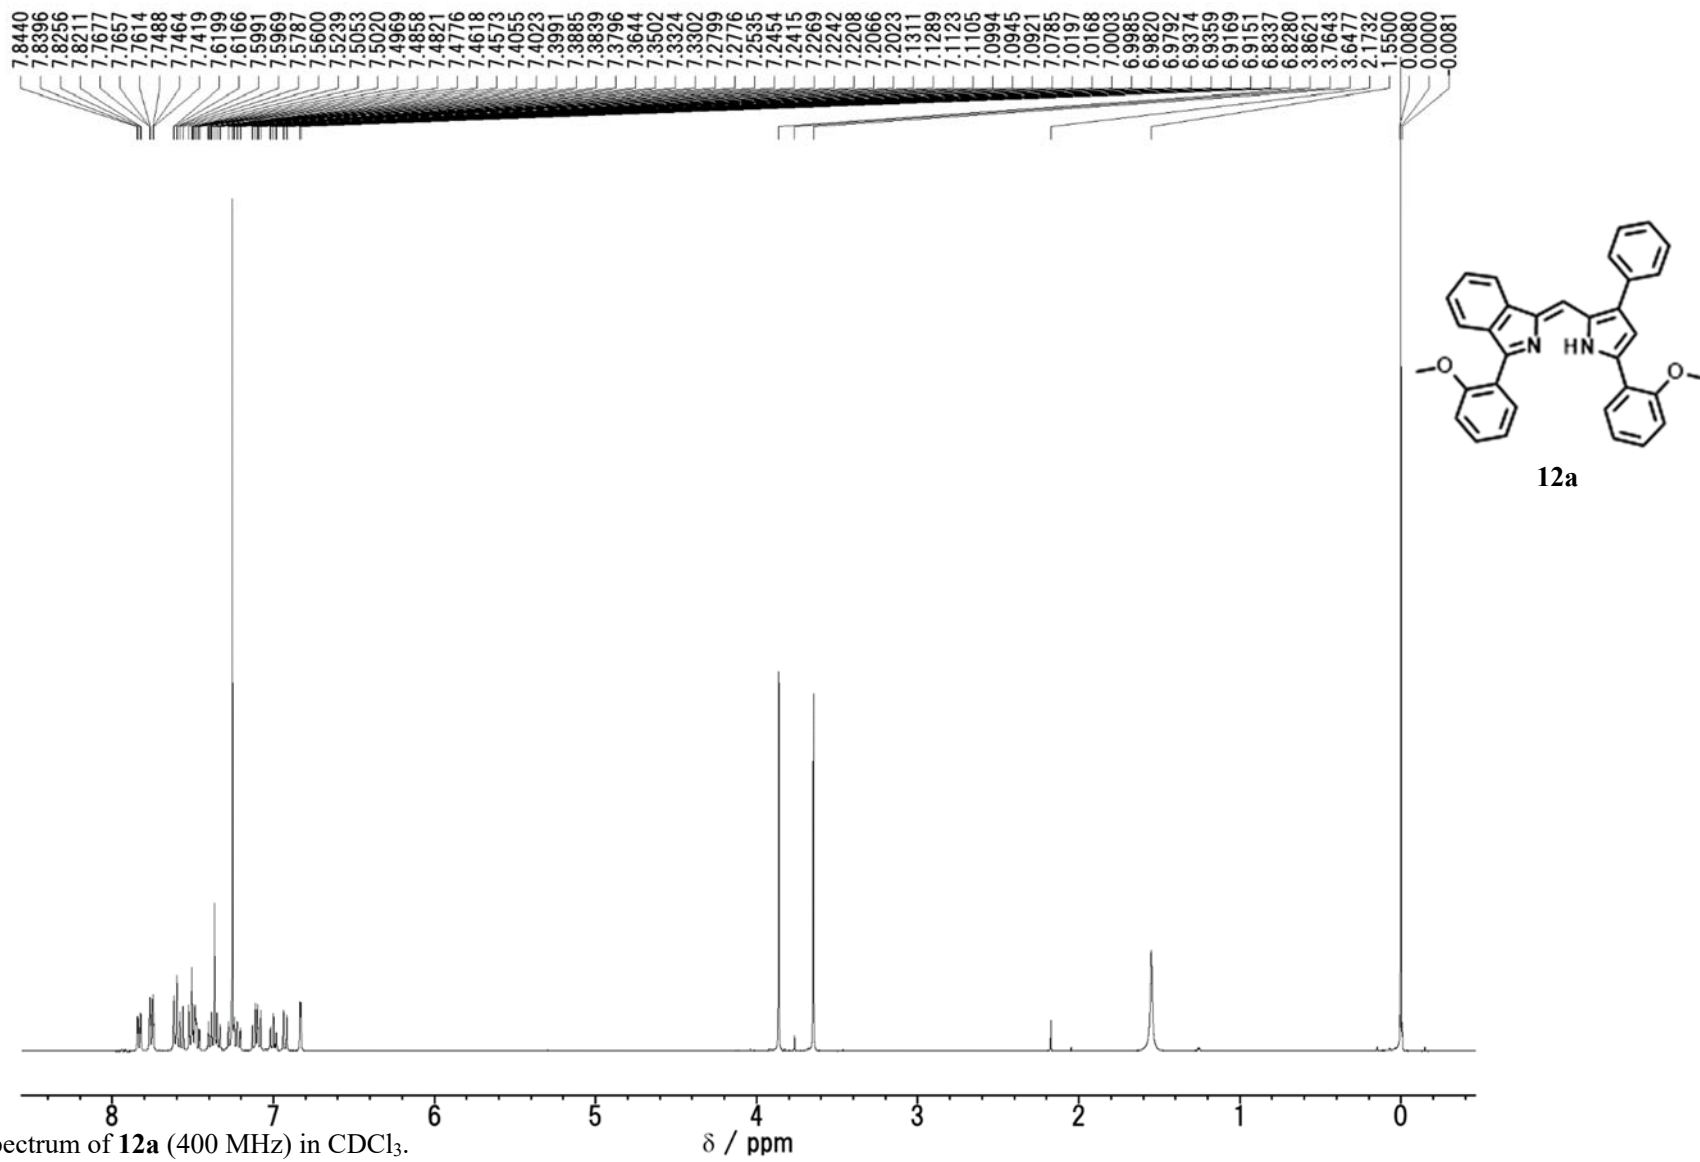

Fig. S53 <sup>1</sup>H NMR spectrum of **12a** (400 MHz) in CDCl<sub>3</sub>.

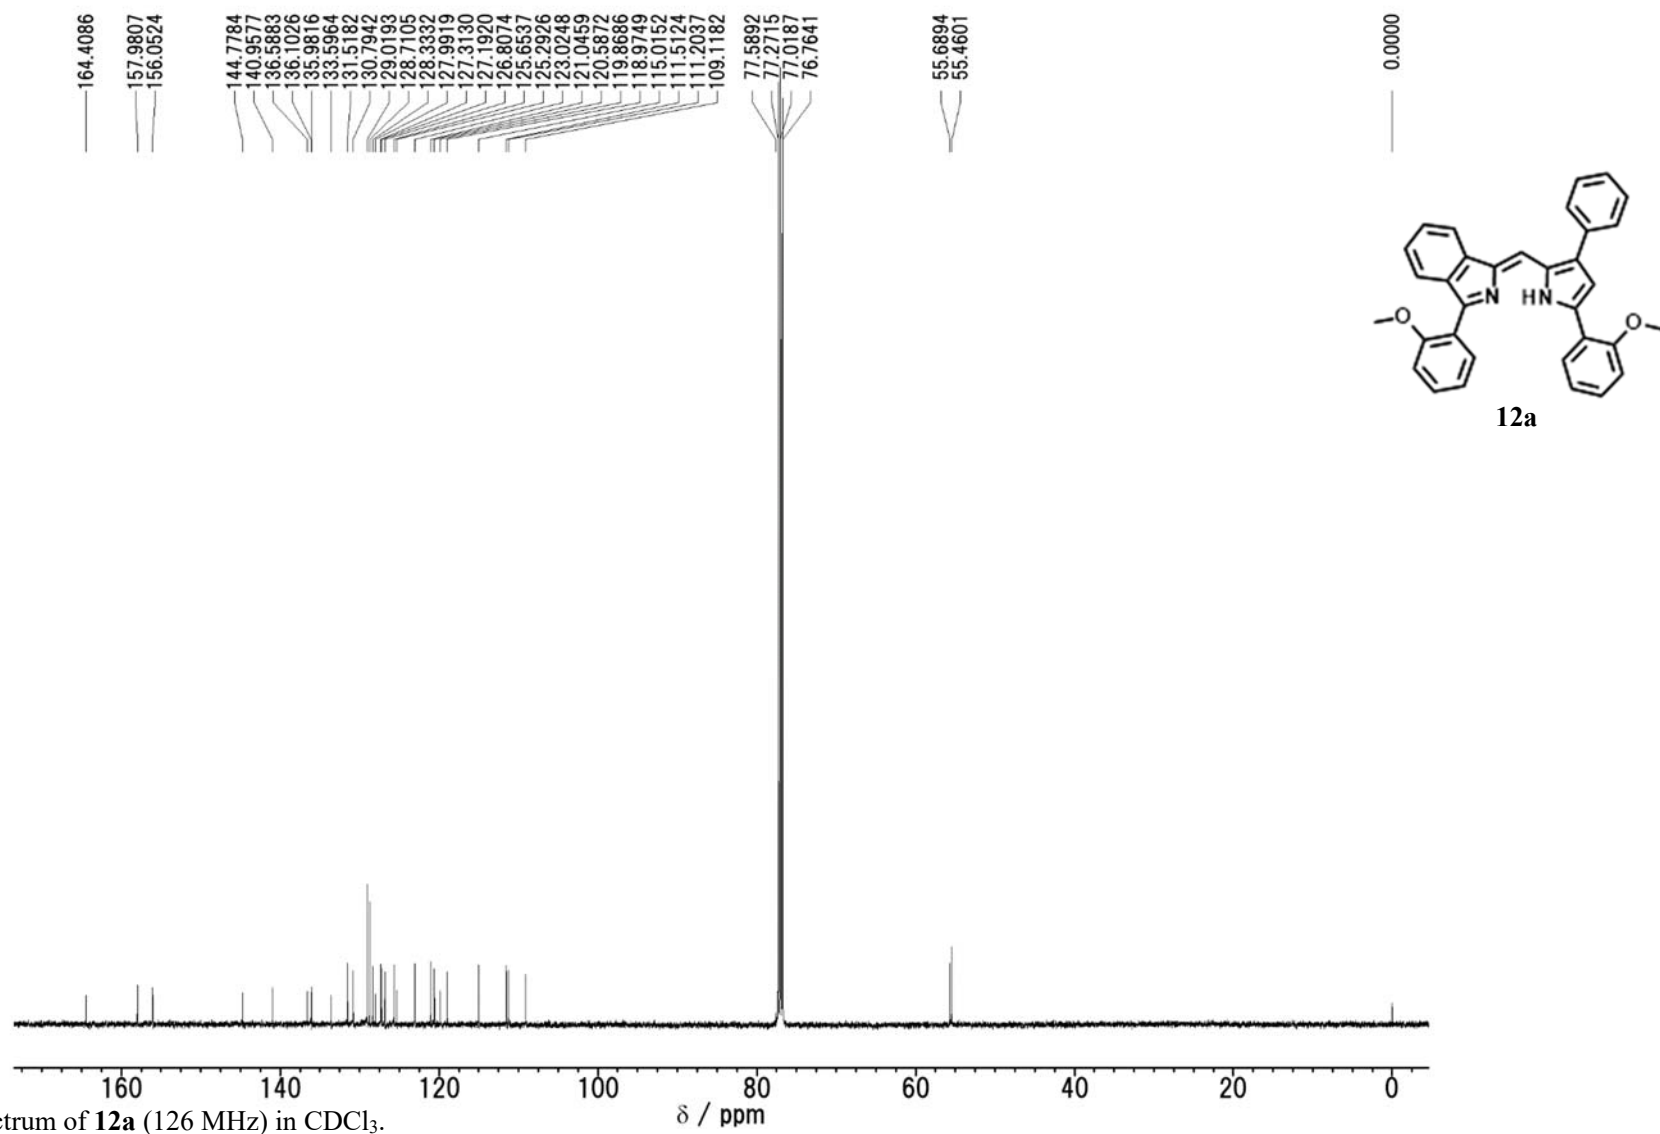

Fig. S54  $^{13}\text{C}$  NMR spectrum of 12a (126 MHz) in  $\text{CDCl}_3$ .

# Generic Display Report

## Analysis Info

Analysis Name D:\Data\syn1\kubo20201219\#1\_Exp44\_1.d  
Method APCI\_pos\_DIP.m  
Sample Name #1\_Exp44\_1  
Comment Cap 150  
Hex 400

Acquisition Date 12/20/2020 1:52:48 AM

Operator BDAL@DE  
Instrument micrOTOF

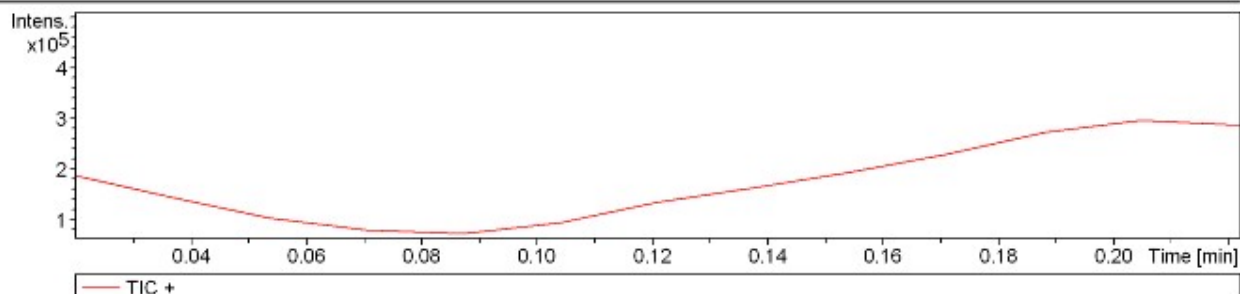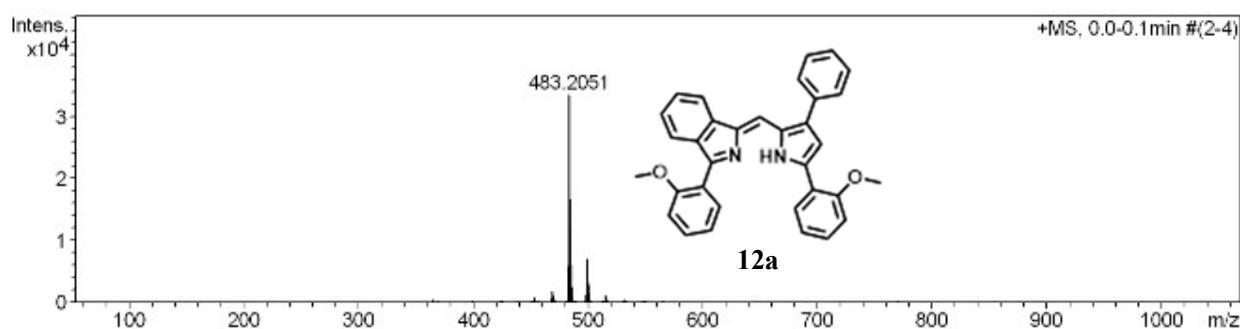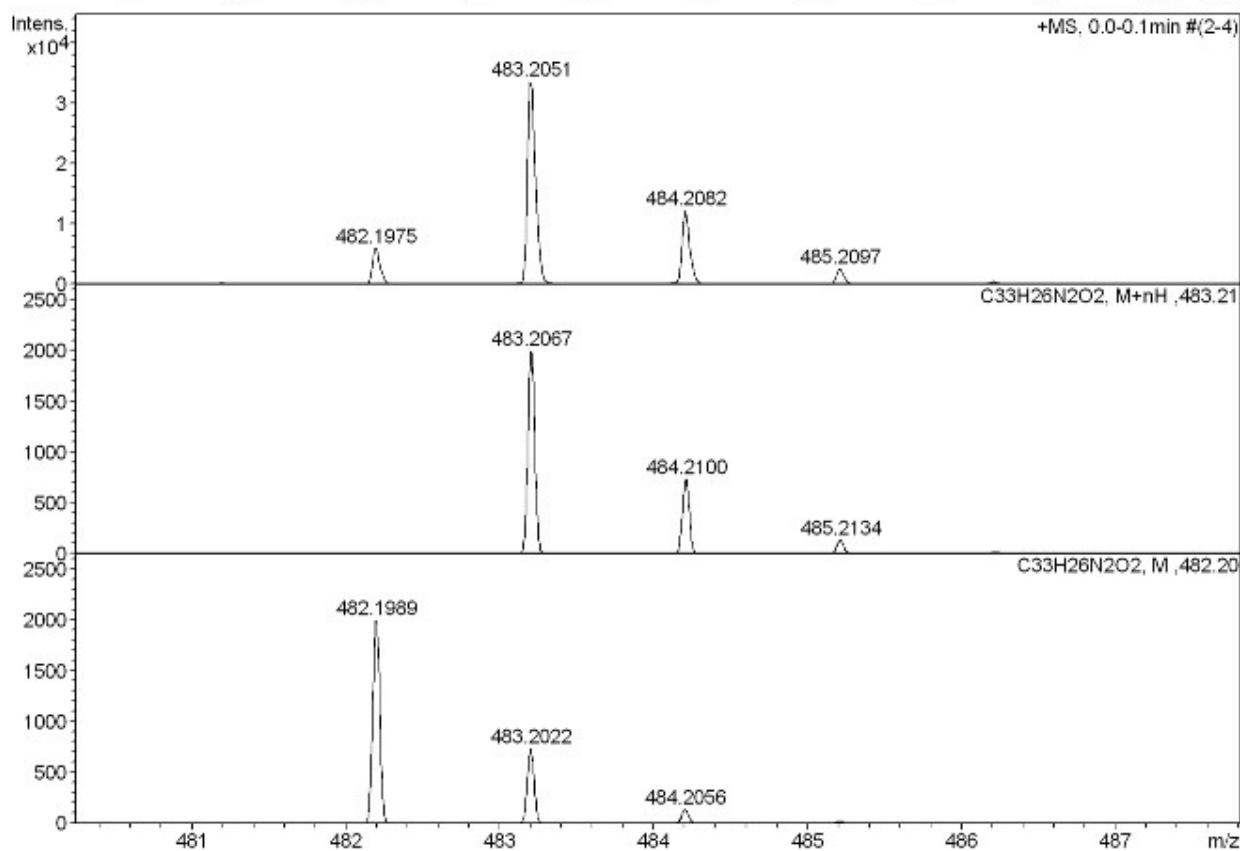

Fig. S55 High resolution of APCI mass spectrum (positive mode) of 12a.

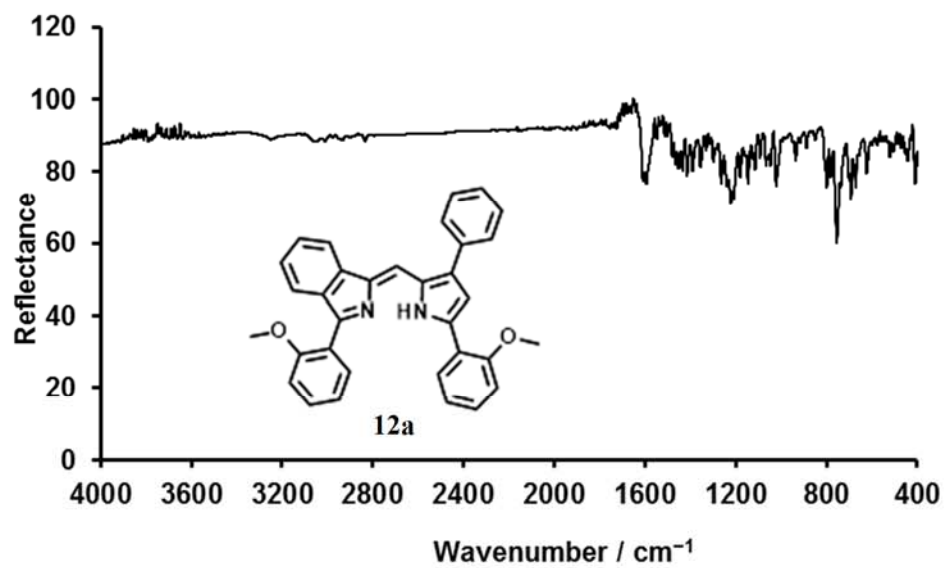

Fig. S56 ATR-FT-IR spectrum of 12a.

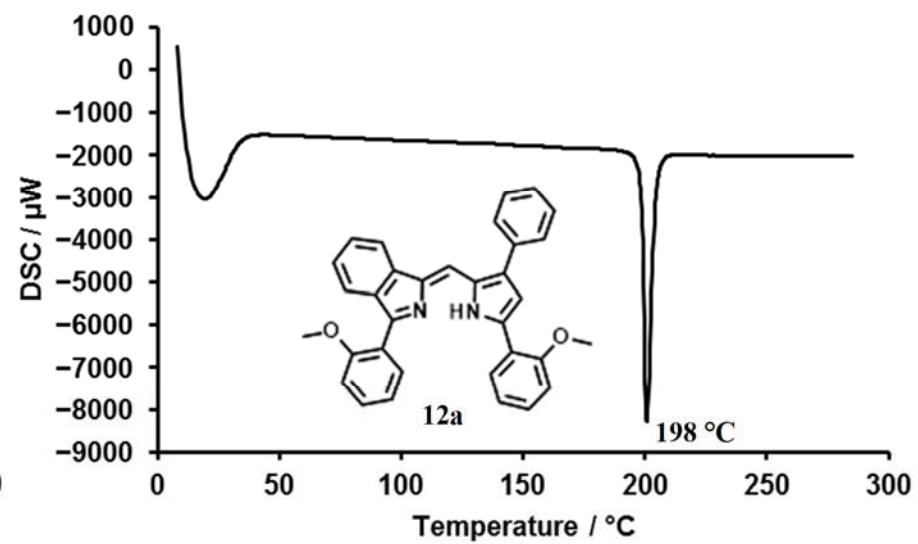

Fig. S57 DSC plots of 12a.

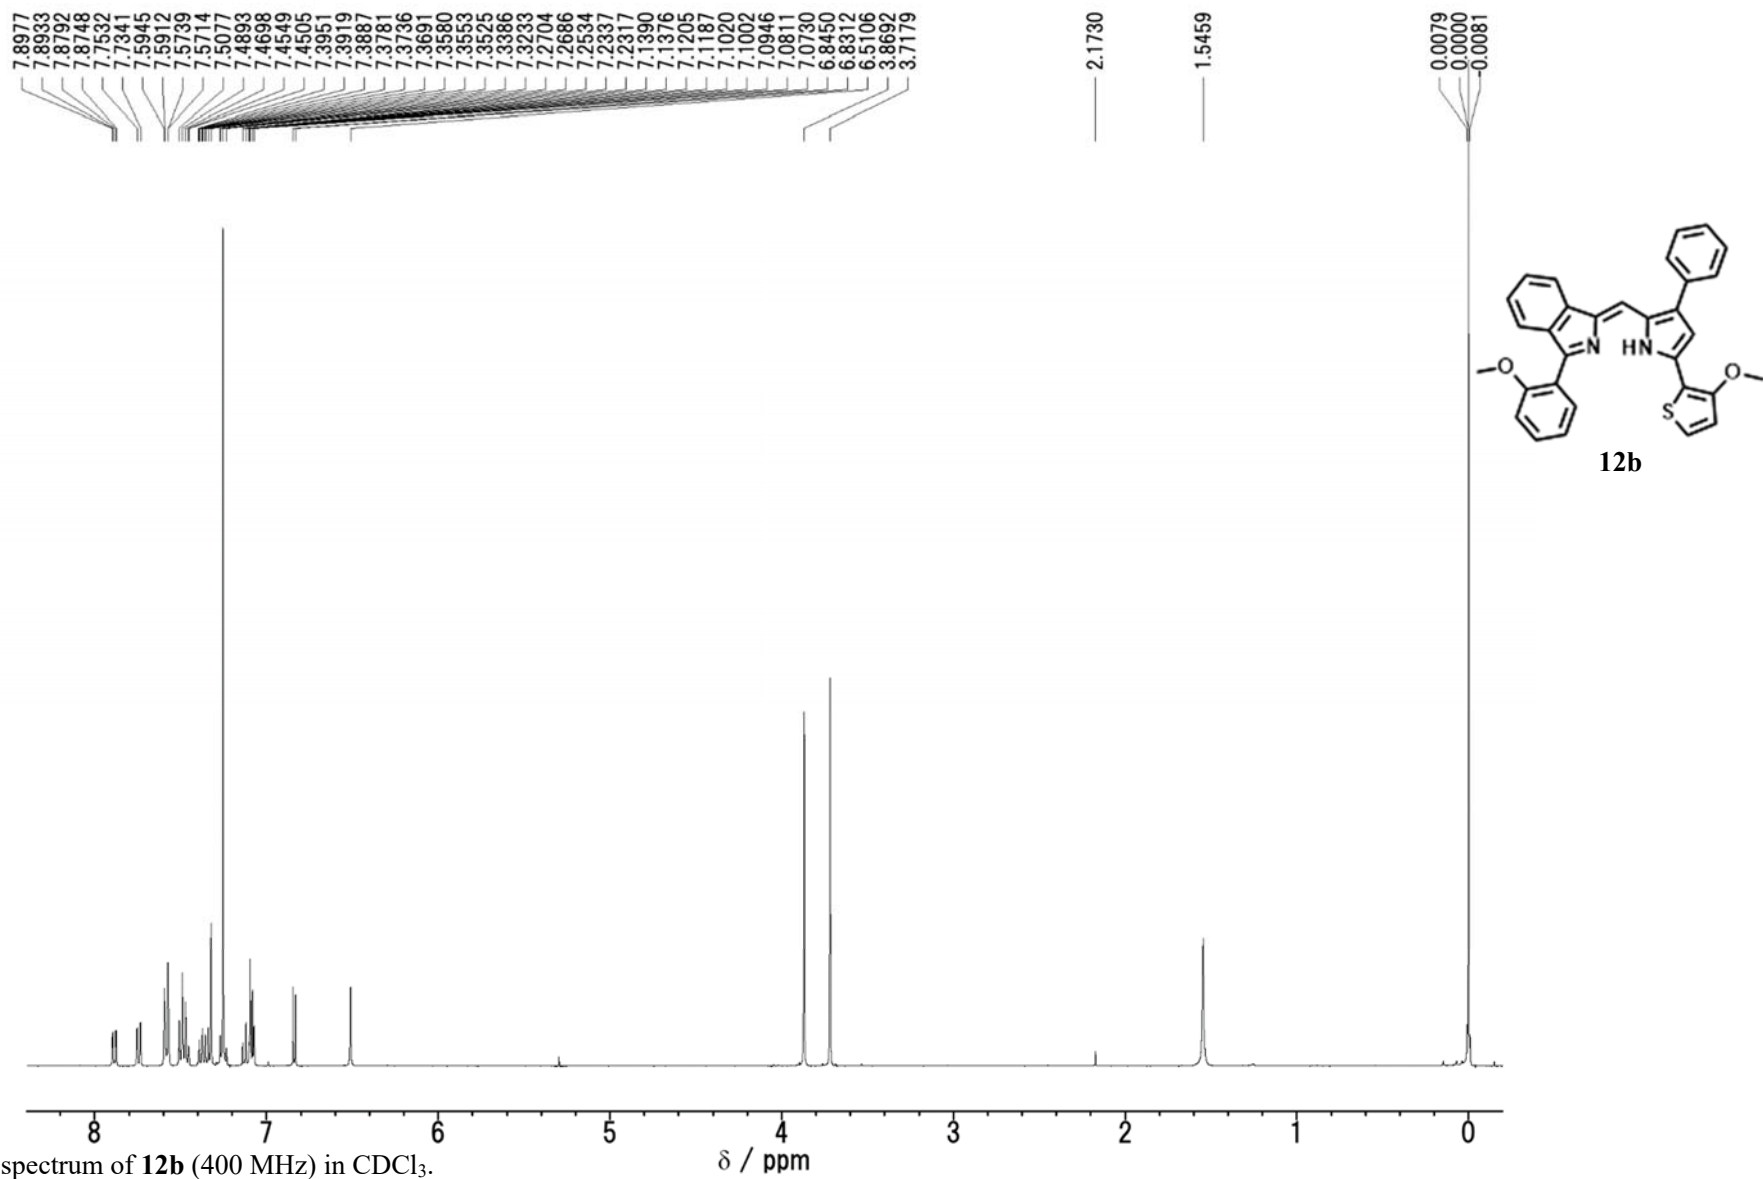

Fig. S58 <sup>1</sup>H NMR spectrum of **12b** (400 MHz) in CDCl<sub>3</sub>.

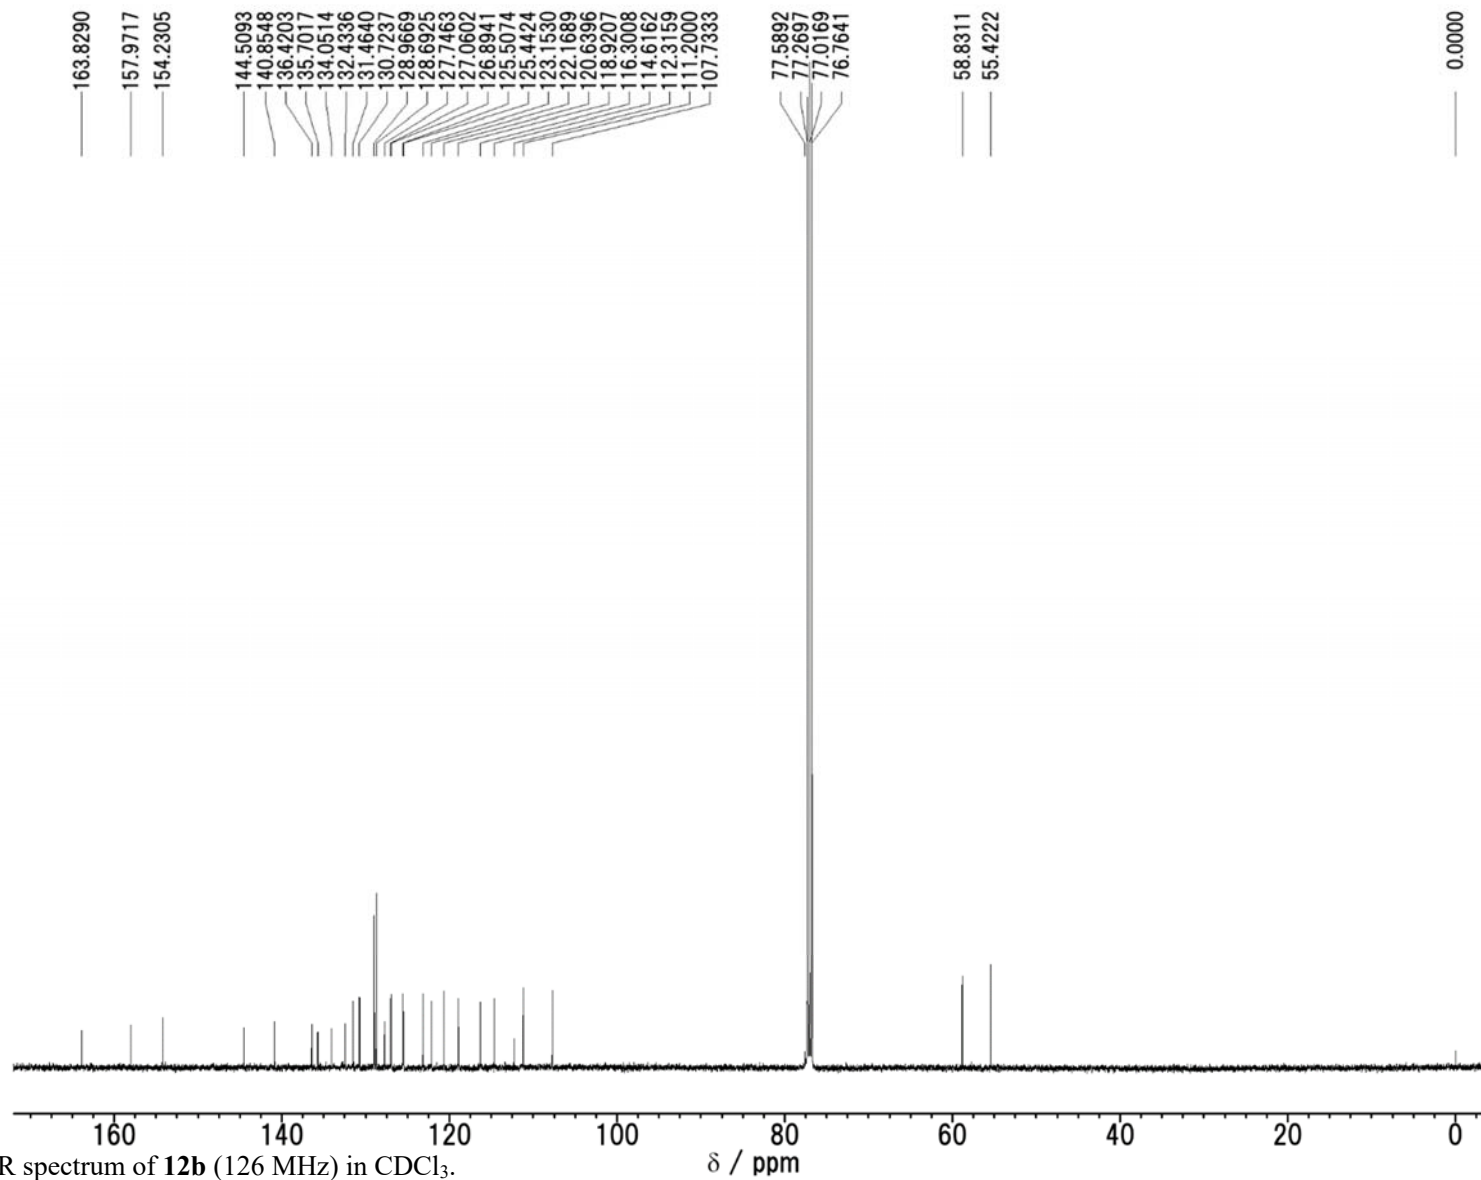

Fig. S59 <sup>13</sup>C NMR spectrum of **12b** (126 MHz) in CDCl<sub>3</sub>.

# Generic Display Report

## Analysis Info

Analysis Name D:\Data\syn1\kubo20201219\#4\_Exp182\_1.d  
Method APCI\_pos\_DIP.m  
Sample Name #4\_Exp182\_1  
Comment Cap 150  
Hex 400

Acquisition Date 12/20/2020 2:39:25 AM

Operator BDAL@DE  
Instrument micrOTOF

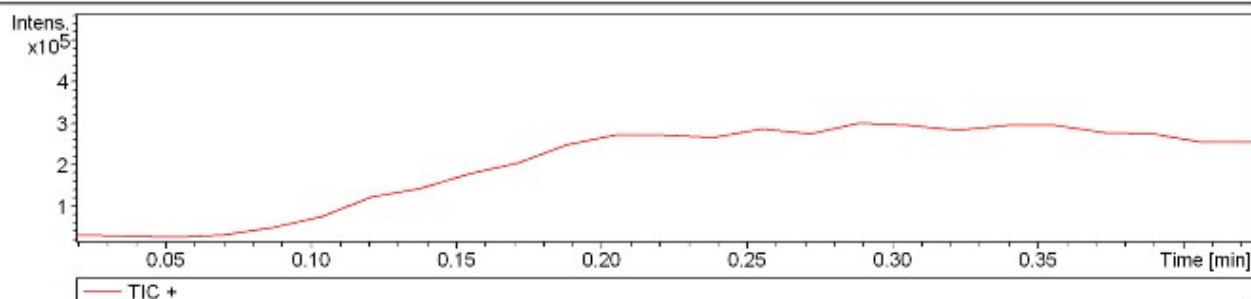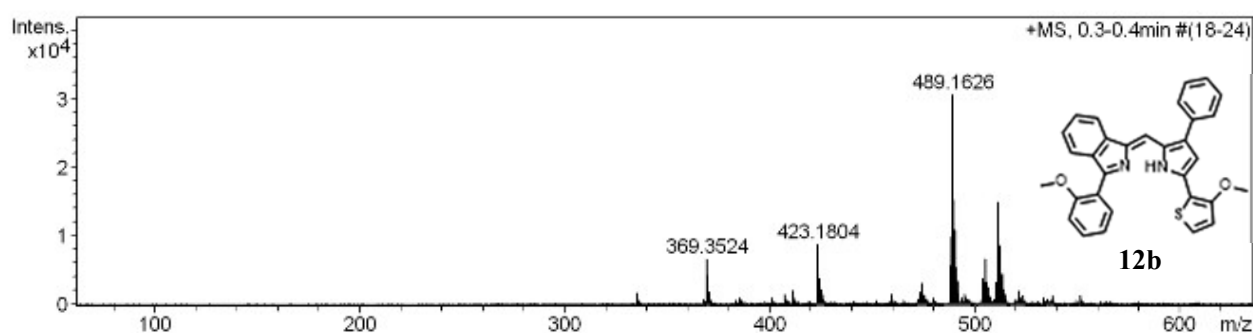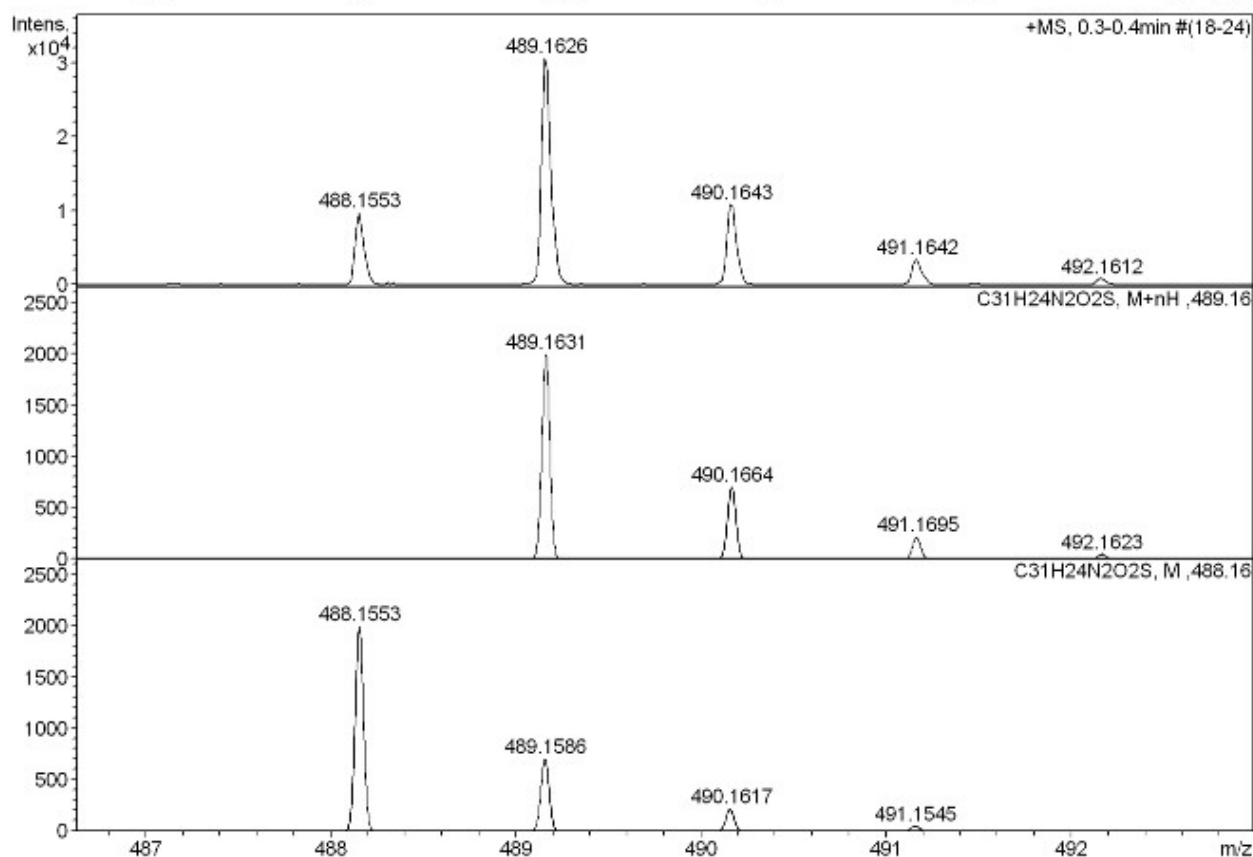

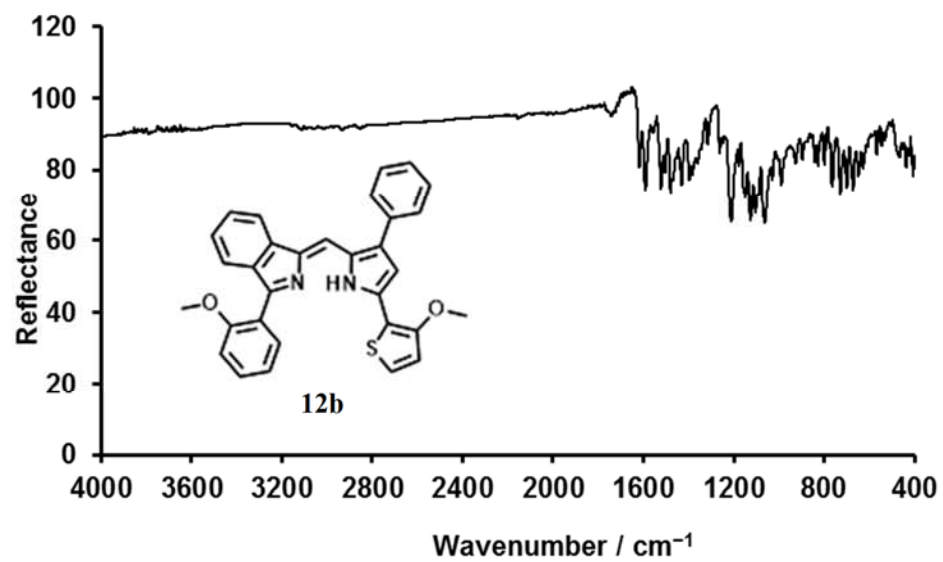

Fig. S61 ATR-FT-IR spectrum of 12b.

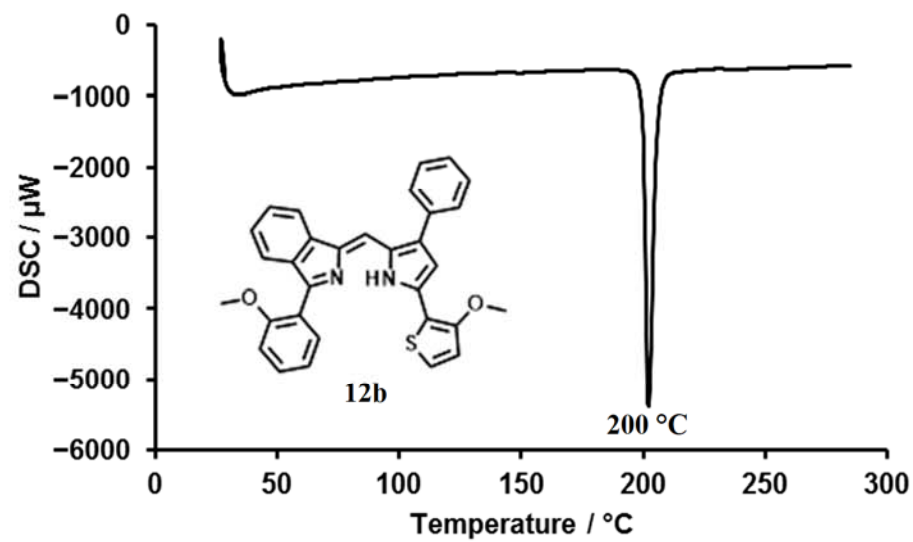

Fig. S62 DSC plots of 12b.



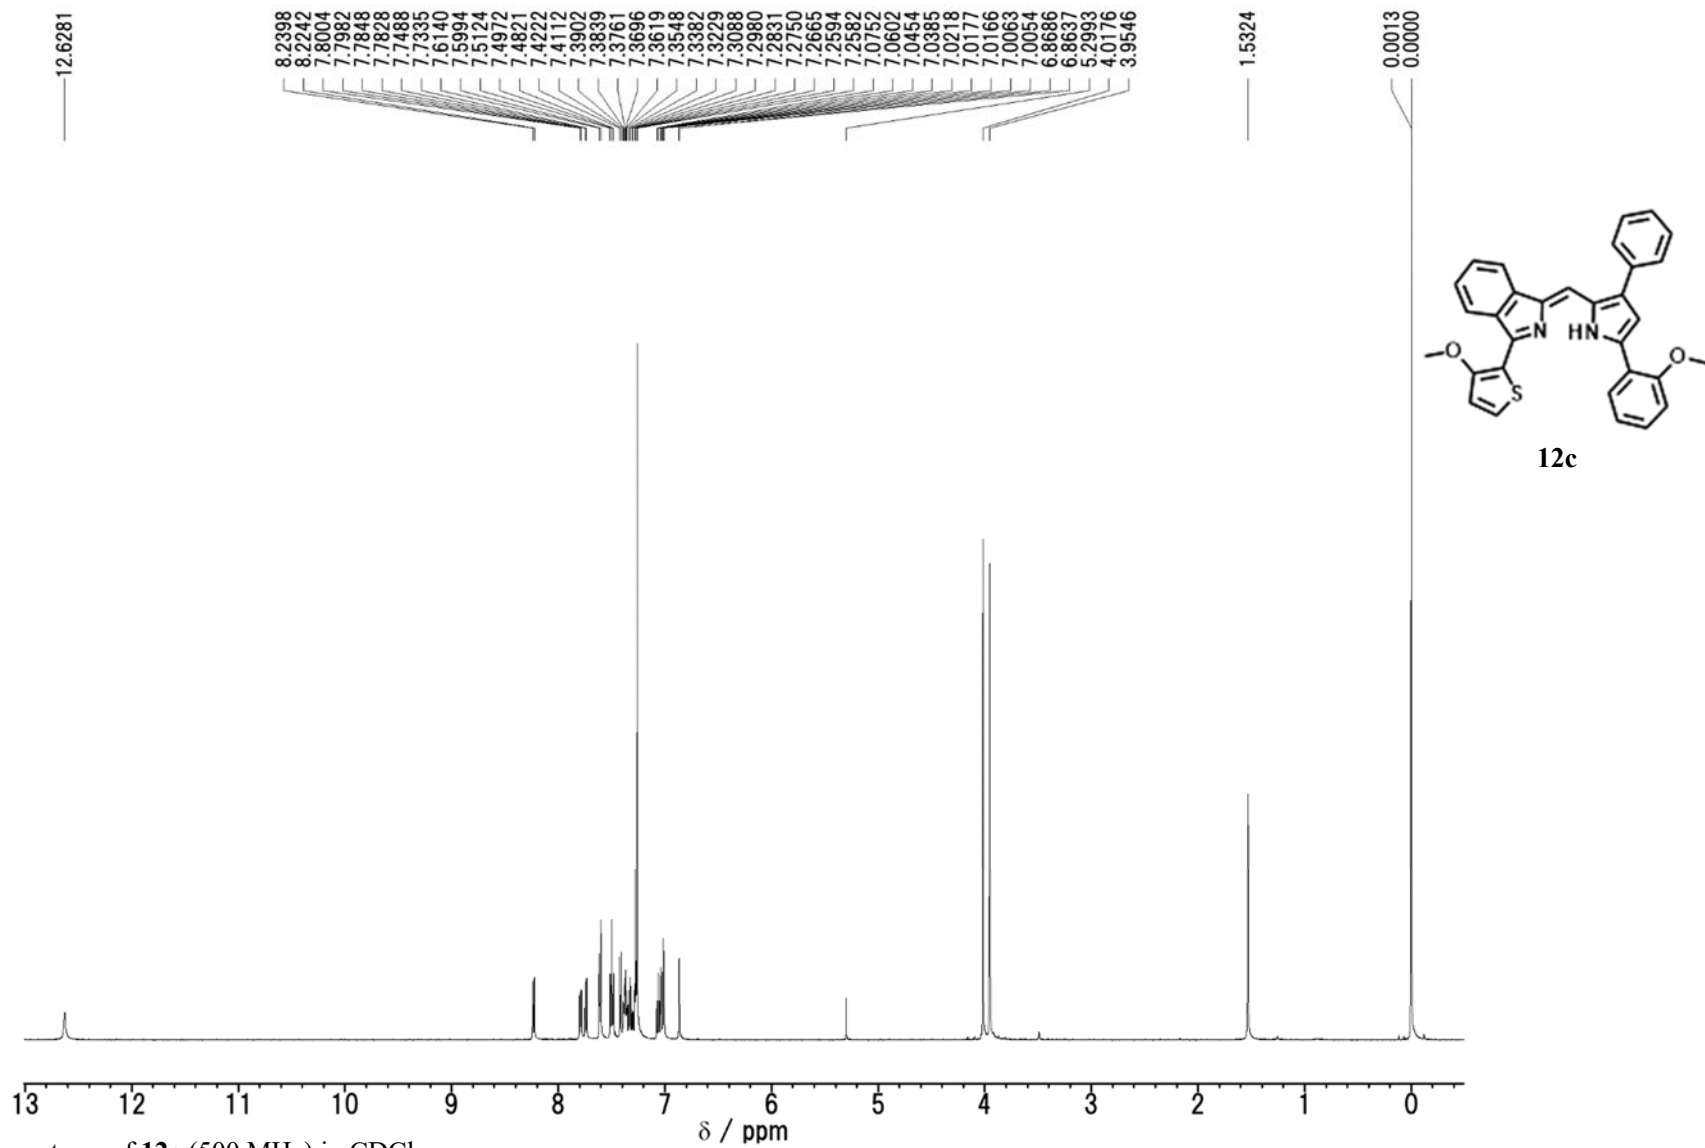

Fig. S63  $^1\text{H}$  NMR spectrum of **12c** (500 MHz) in  $\text{CDCl}_3$ .

# Generic Display Report

## Analysis Info

Analysis Name D:\Data\syn1\kubo20201219\#7\_Exp53\_1.d  
Method APCI\_pos\_DIP.m  
Sample Name #7\_Exp53\_1  
Comment Cap 150  
Hex 400

Acquisition Date 12/20/2020 2:59:19 AM

Operator BDAL@DE  
Instrument micrOTOF

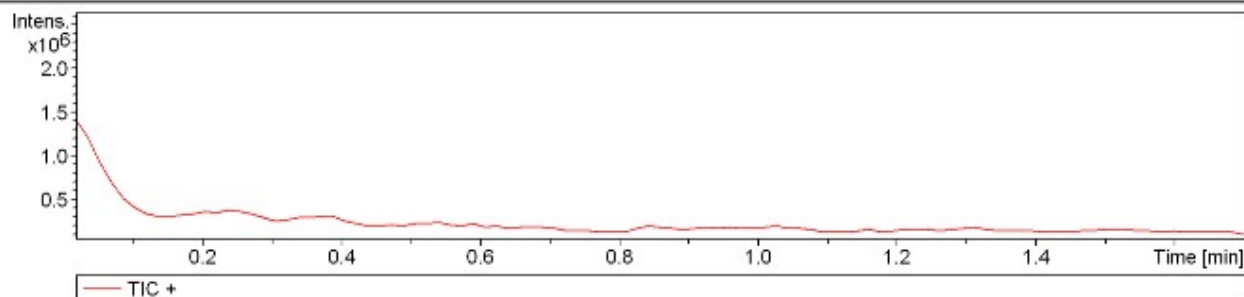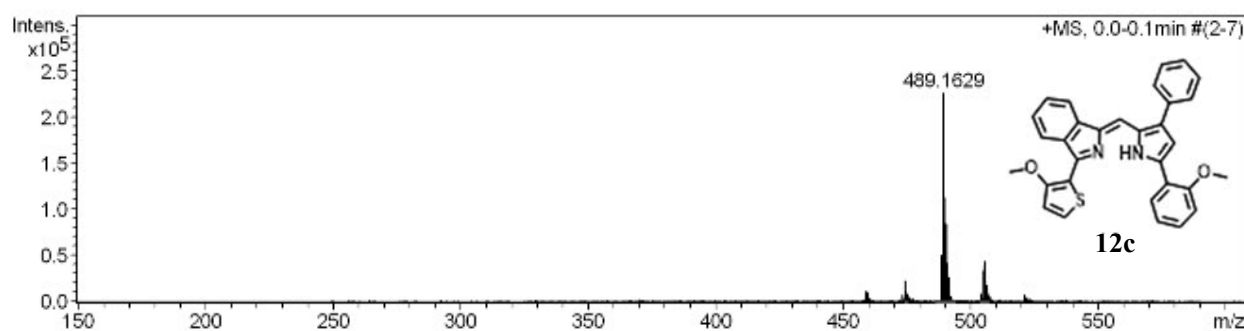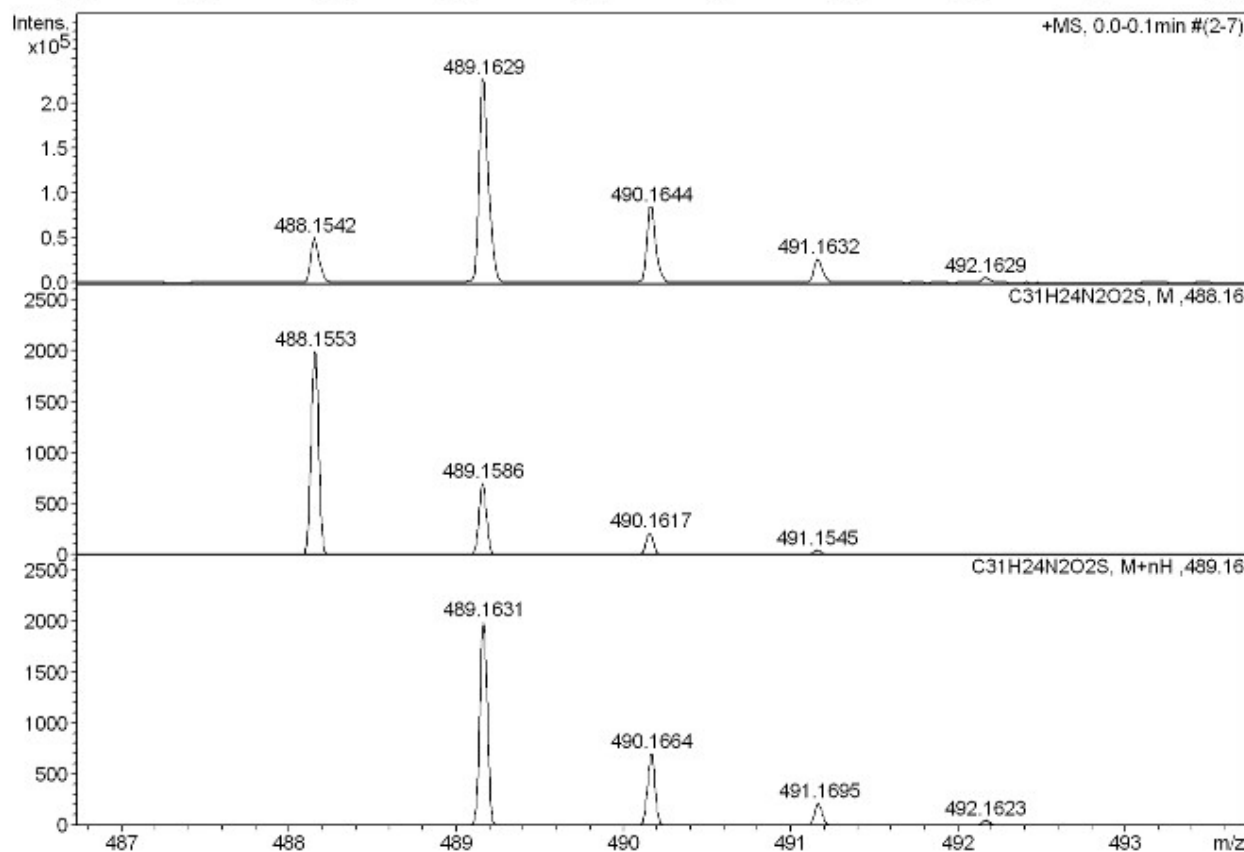

Fig. S64 High resolution of APCI mass spectrum (positive mode) of **12c**.

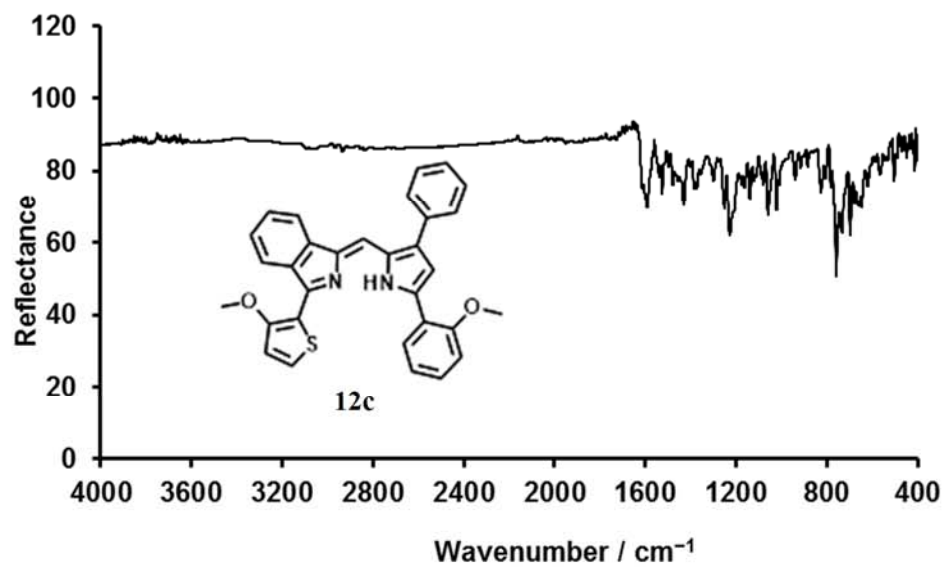

Fig. S65 ATR-FT-IR spectrum of 12c.

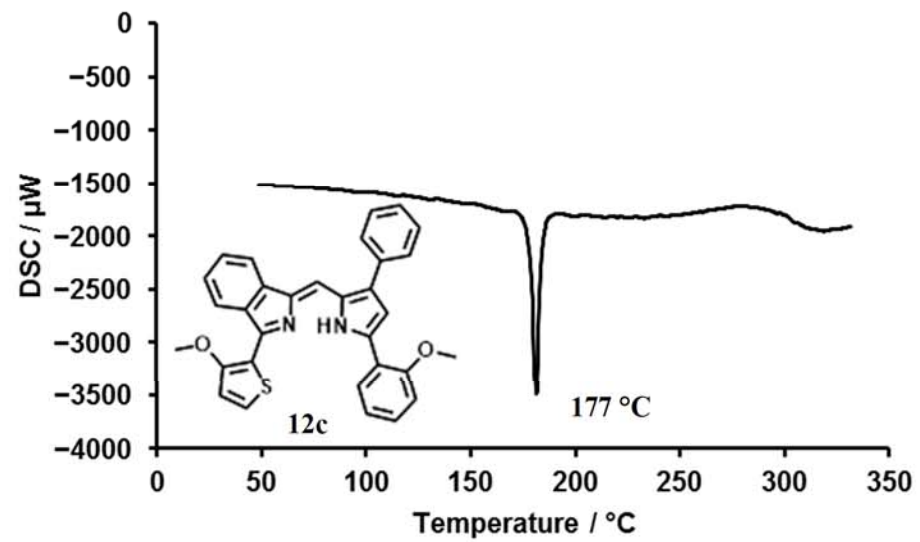

Fig. S66 DSC plots of 12c.

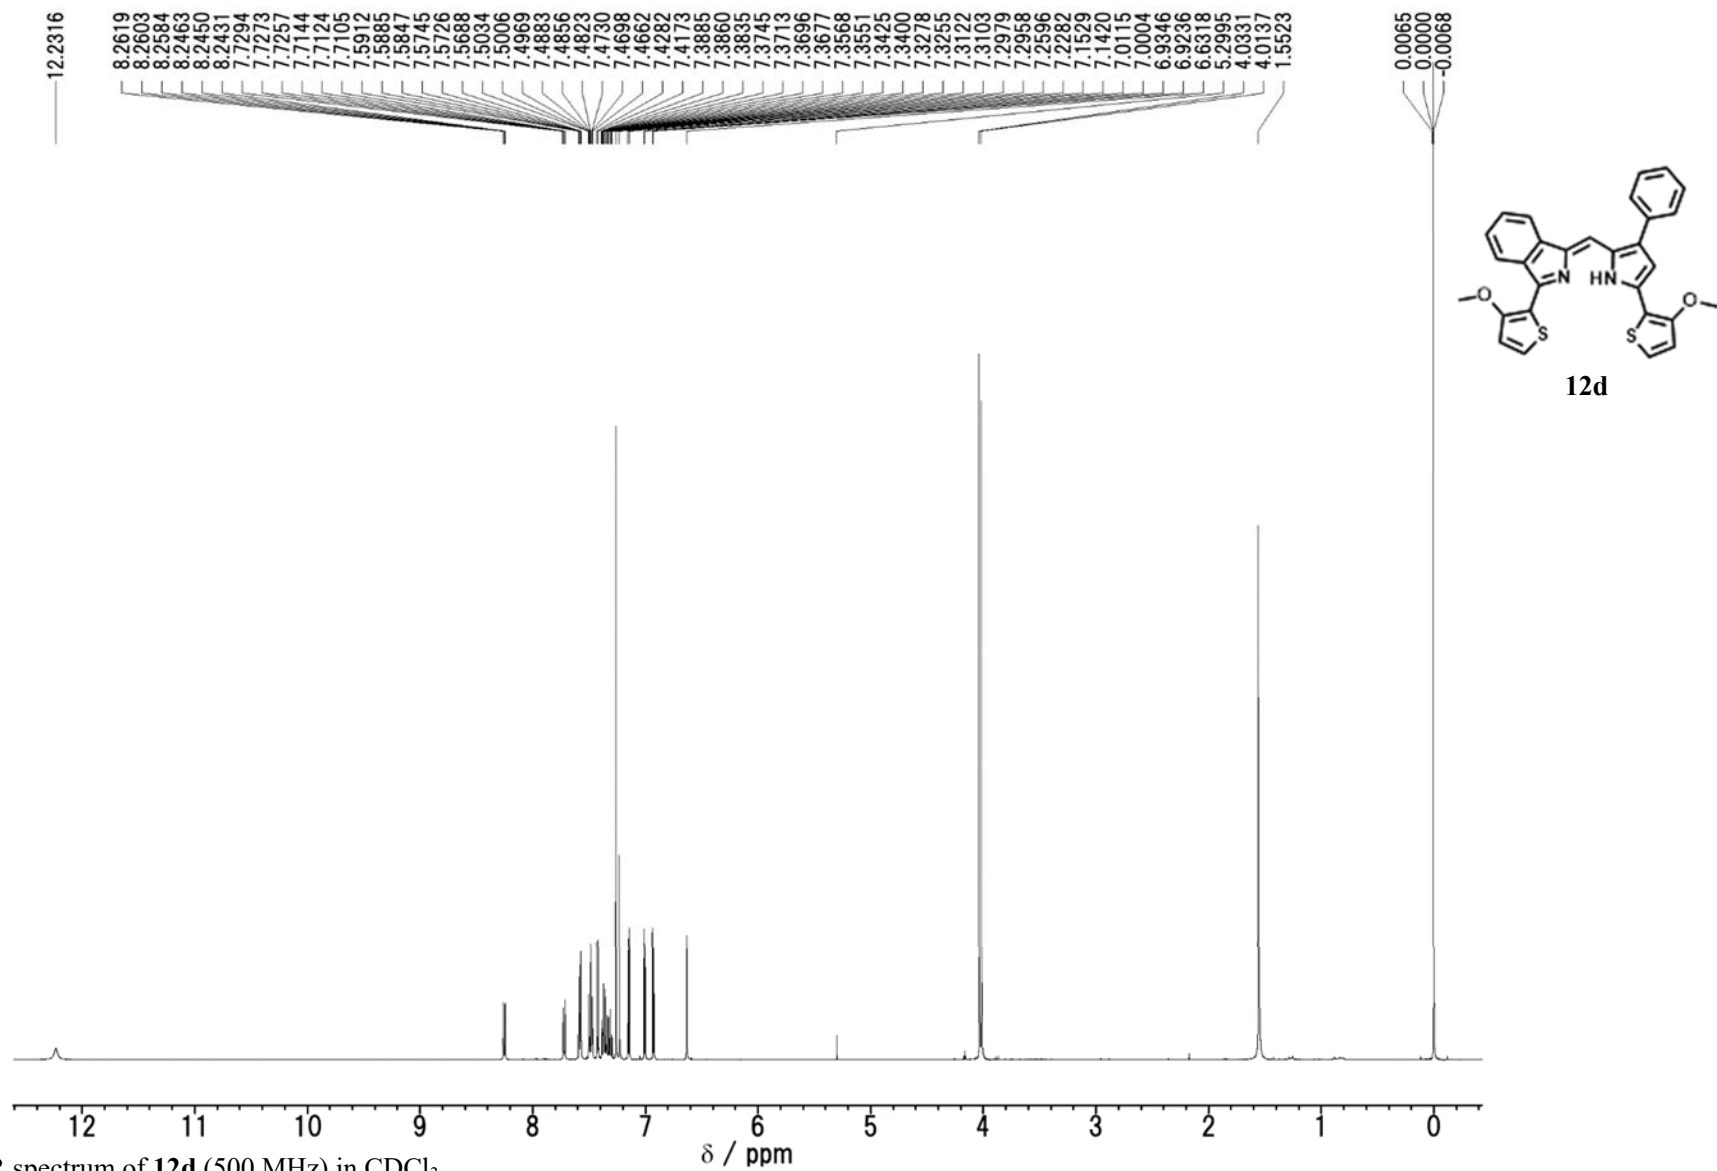

Fig. S67  $^1\text{H}$  NMR spectrum of **12d** (500 MHz) in  $\text{CDCl}_3$ .

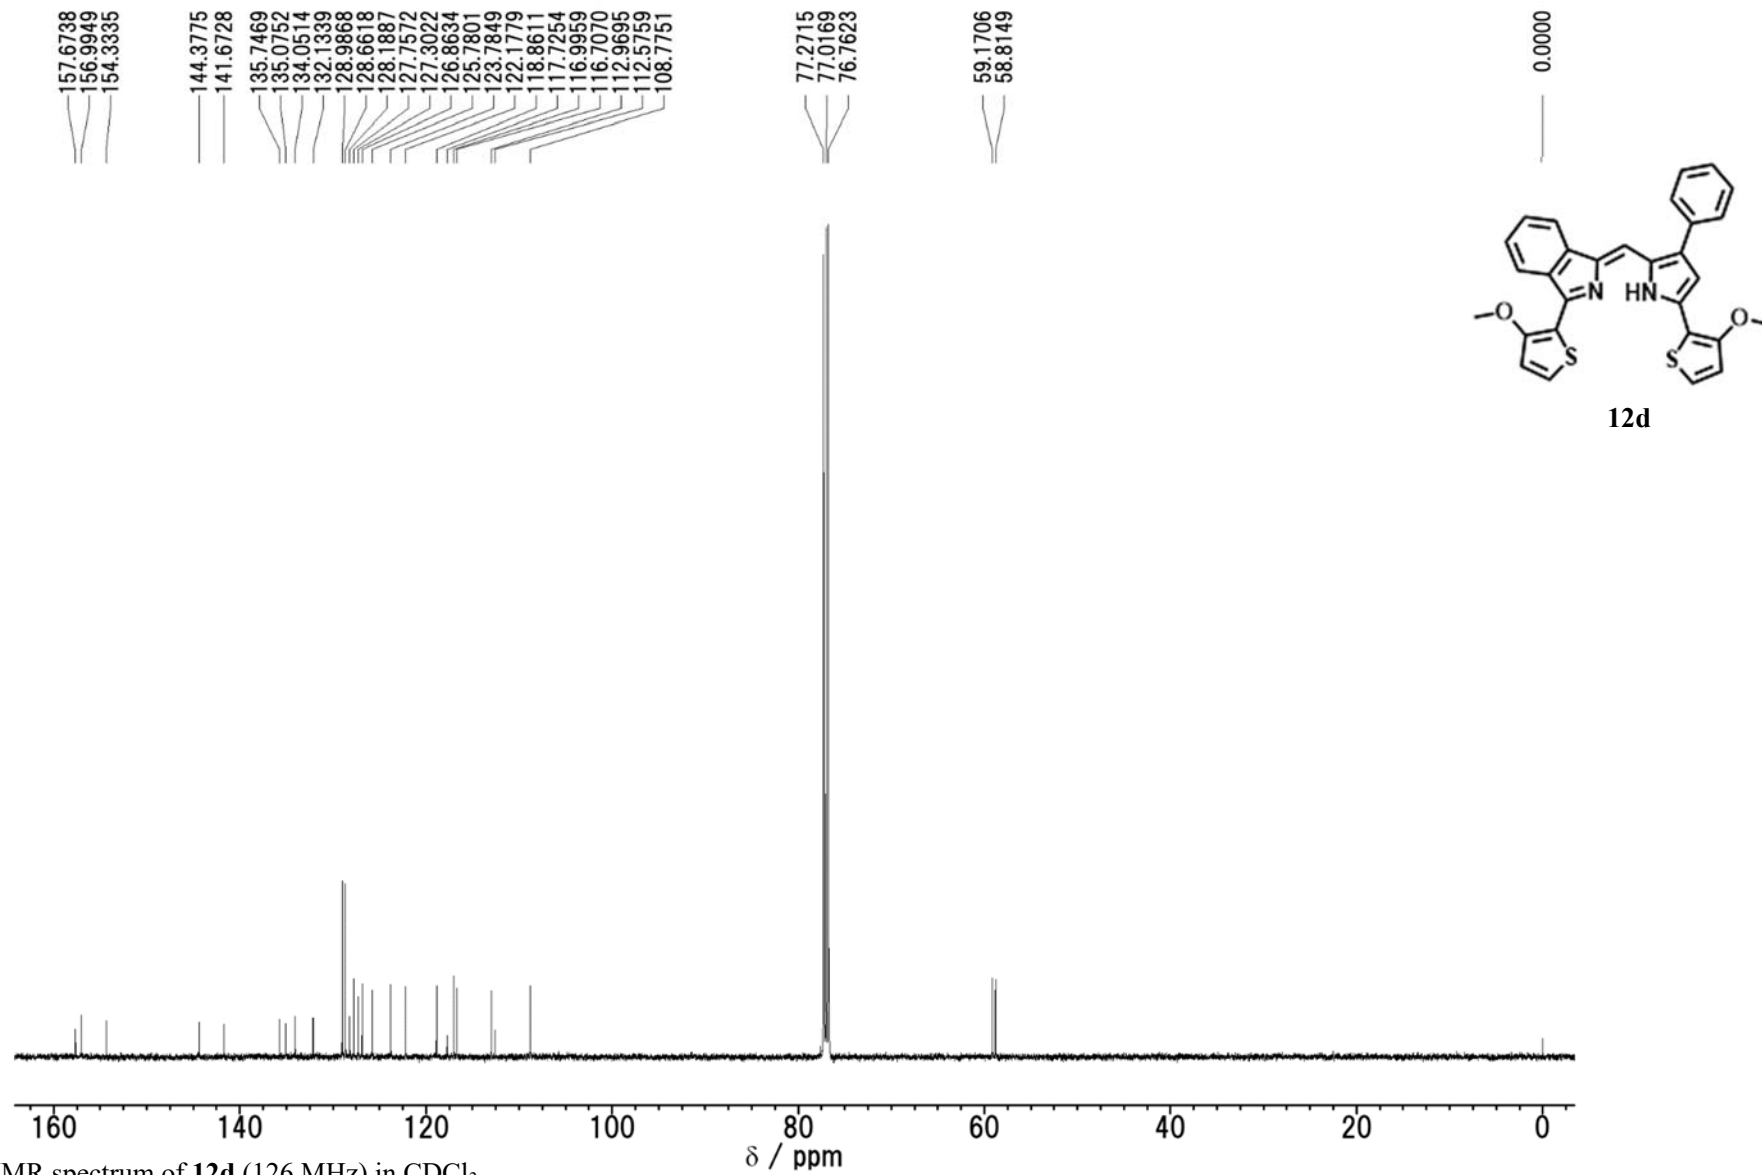

Fig. S68  $^{13}\text{C}$  NMR spectrum of **12d** (126 MHz) in  $\text{CDCl}_3$ .

# Generic Display Report

## Analysis Info

Analysis Name D:\Data\syn1\kubo20201219\#10\_Exp130\_2.d  
Method APCI\_pos\_DIP.m  
Sample Name #10\_Exp130\_2  
Comment Cap 70  
Hex 400

Acquisition Date 12/20/2020 3:40:40 AM

Operator BDAL@DE  
Instrument micrOTOF

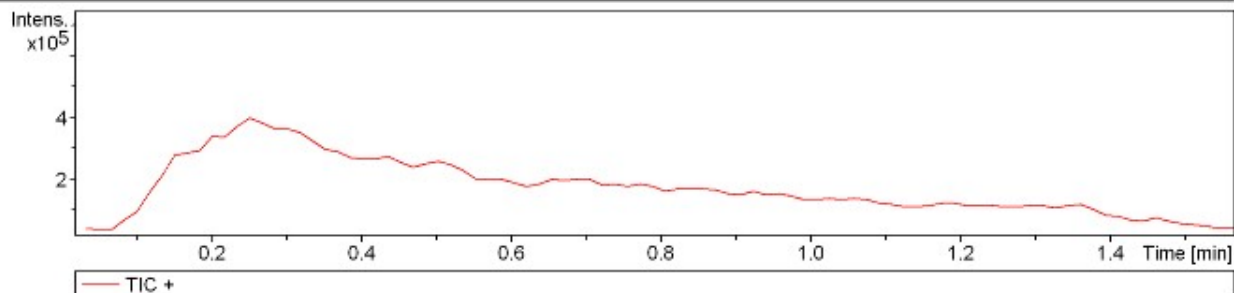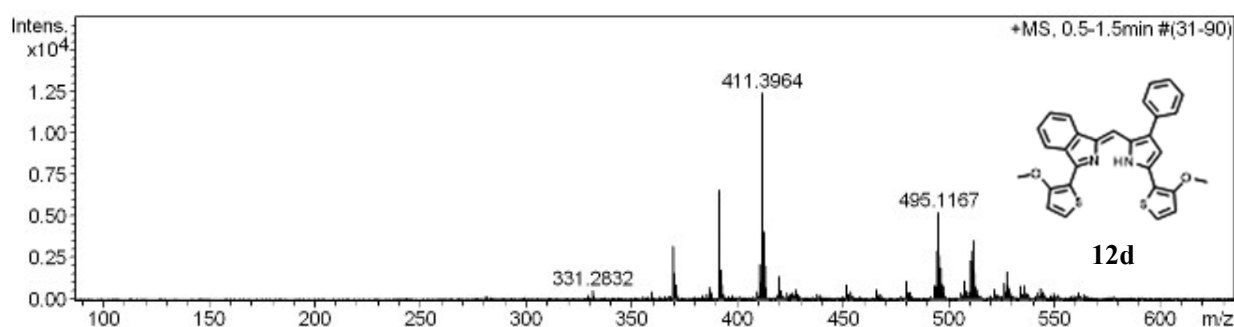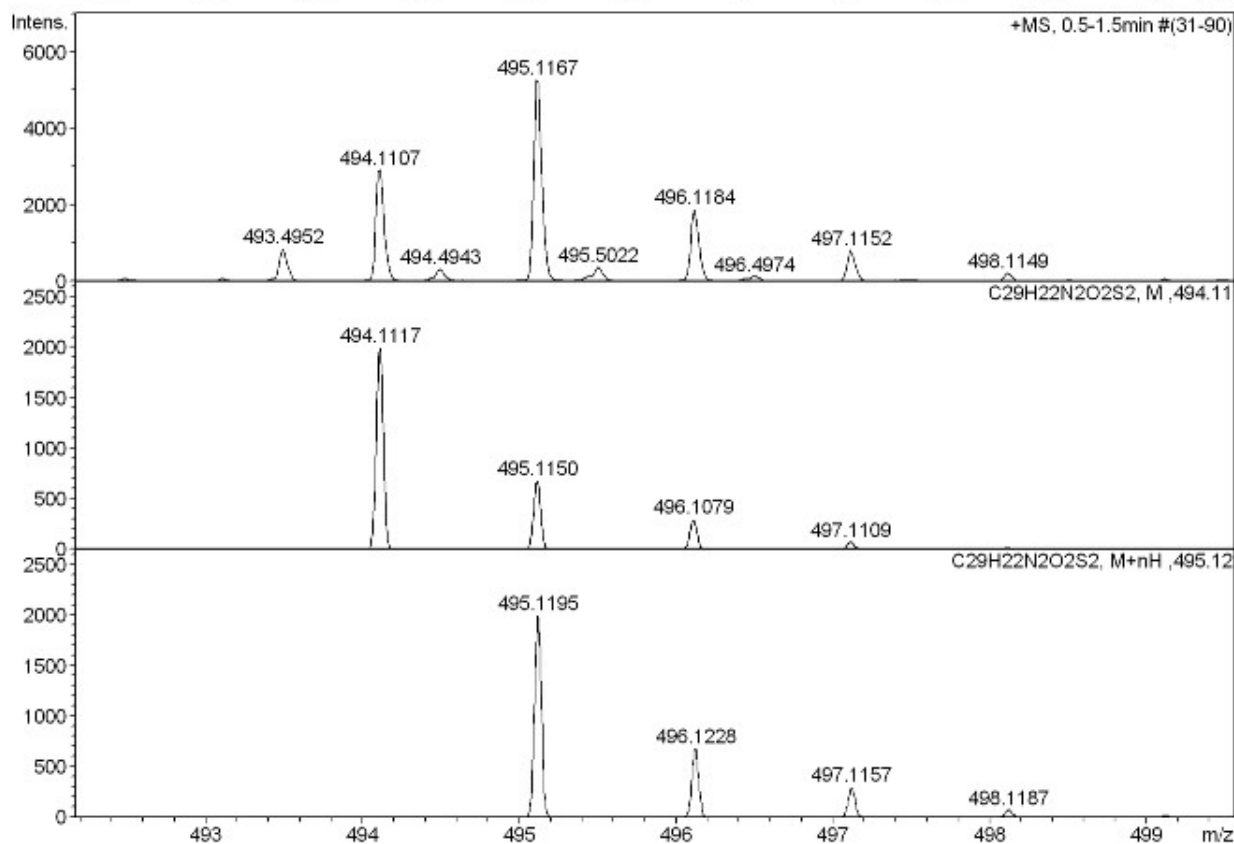

Fig. S69 High resolution of APCI mass spectrum (positive mode) of **12d**.  
S-62

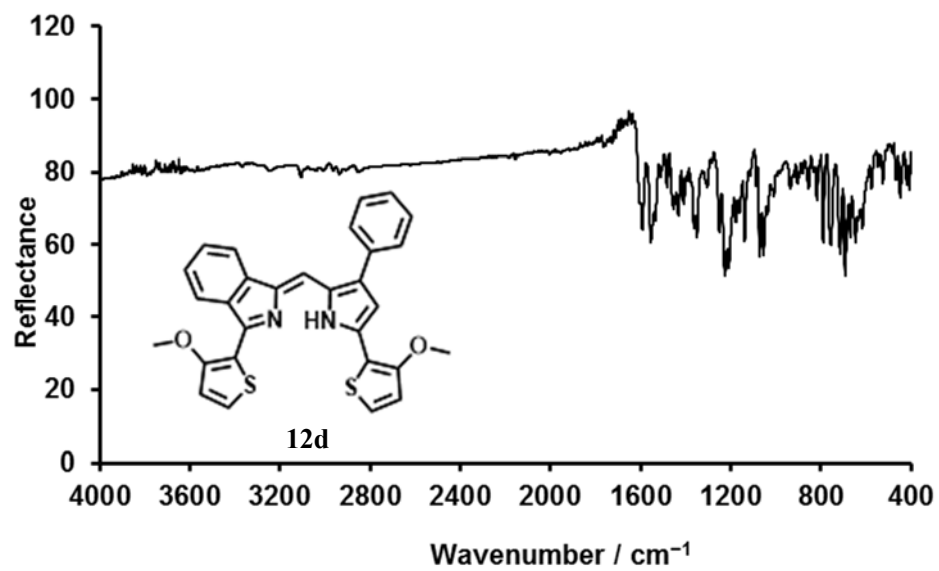

Fig. S70 ATR-FT-IR spectrum of 12d.

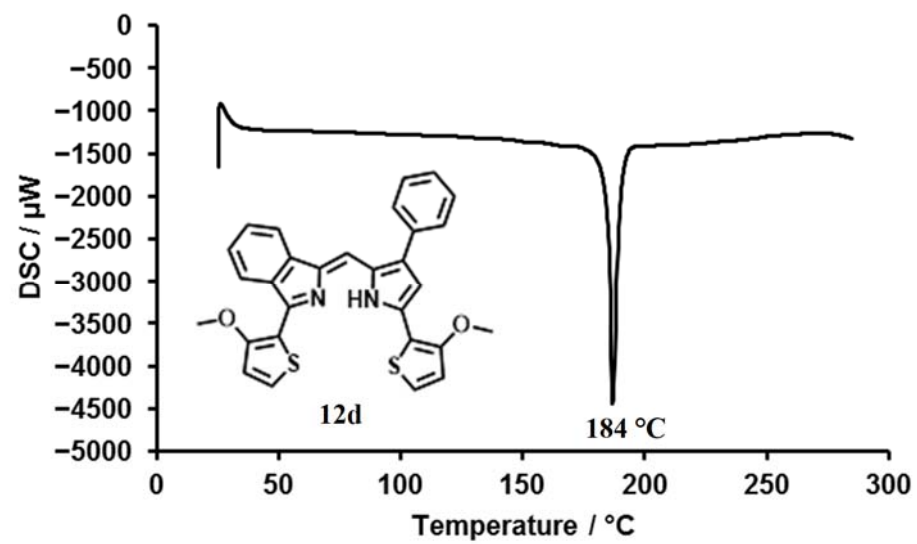

Fig. S71 DSC plots of 12d.

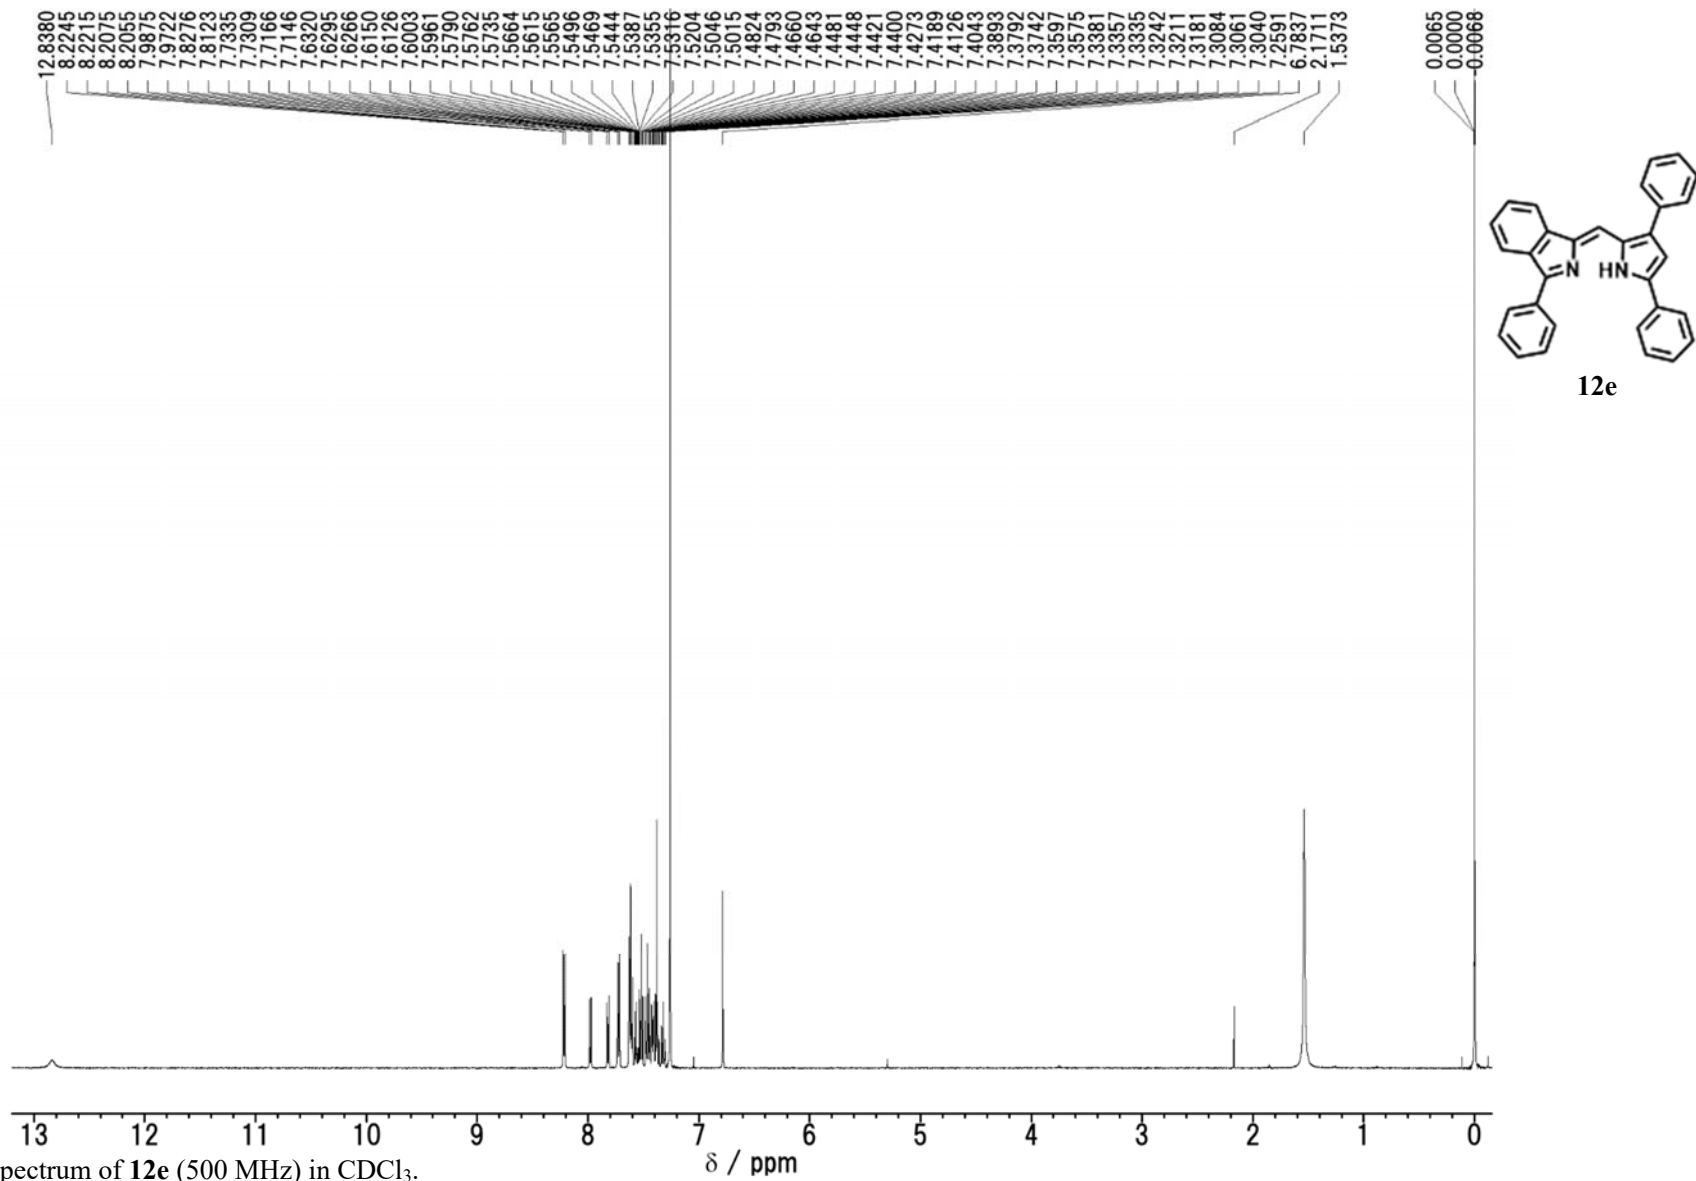

Fig. S72 <sup>1</sup>H NMR spectrum of 12e (500 MHz) in CDCl<sub>3</sub>.



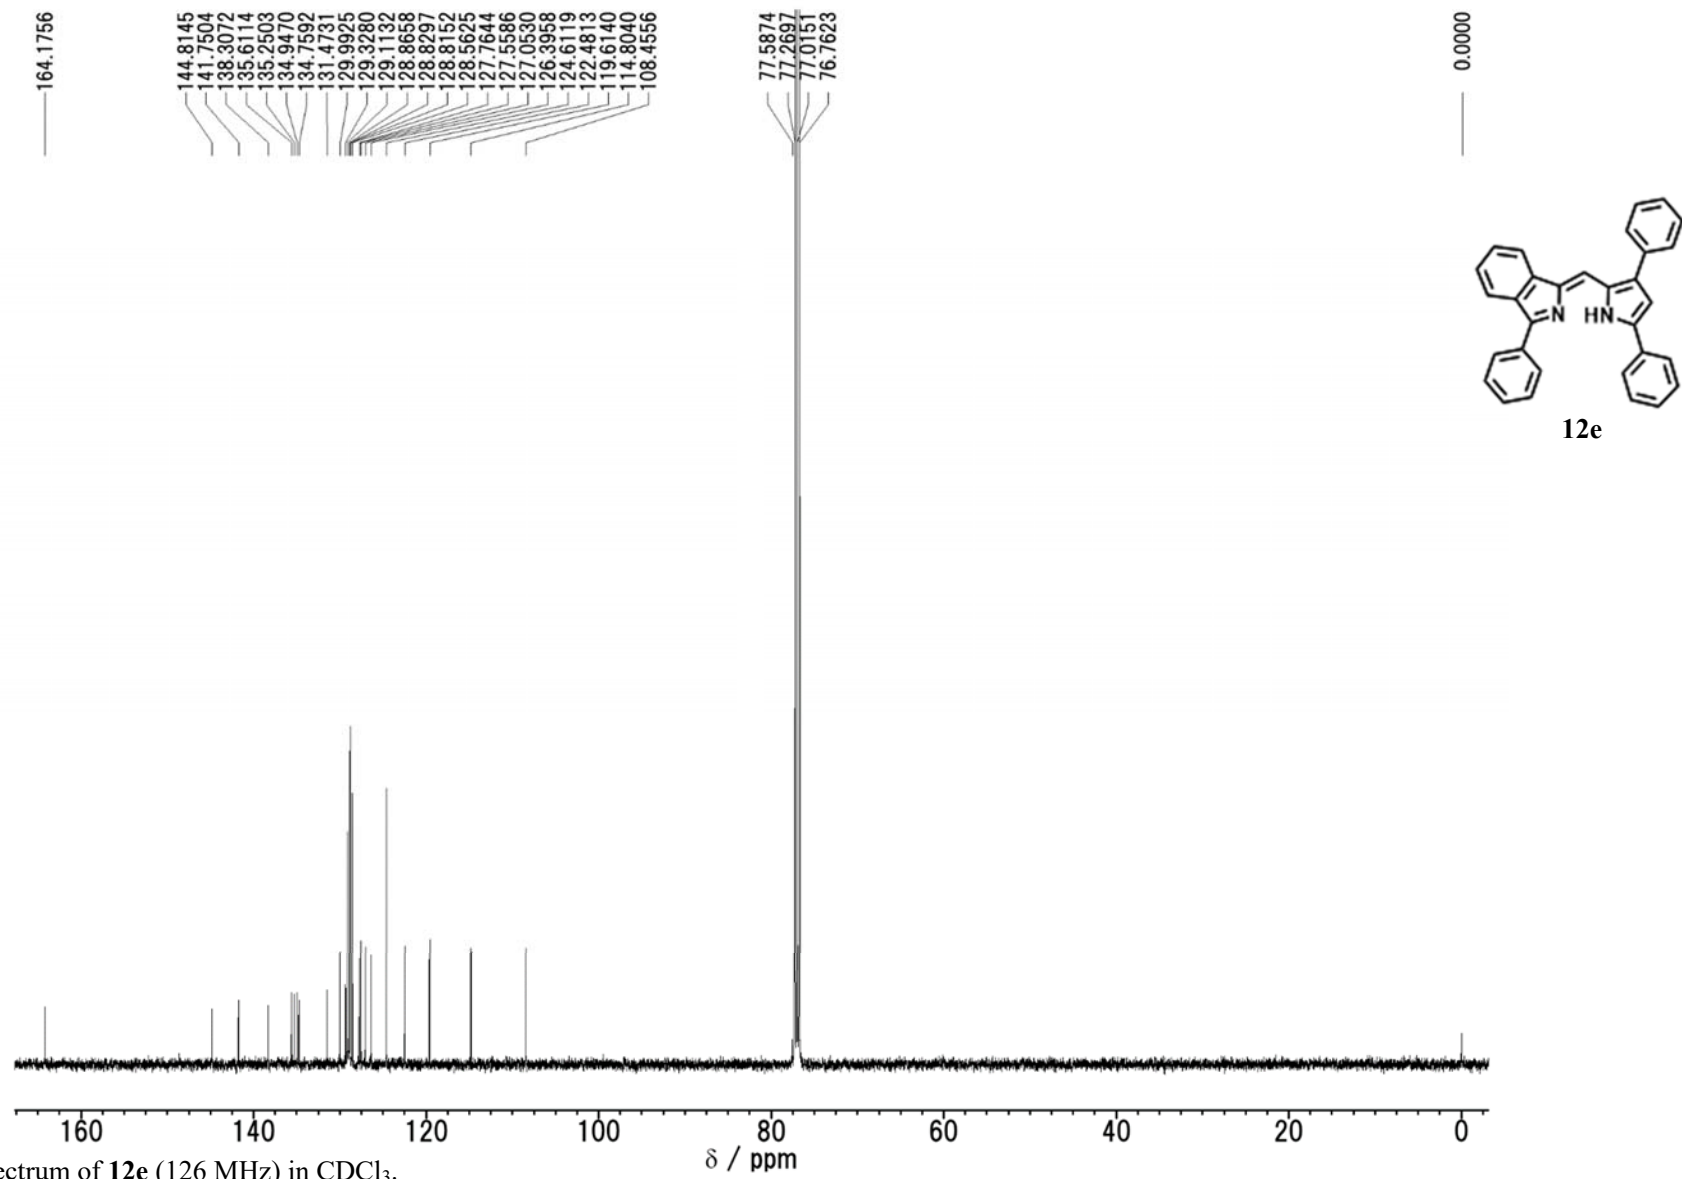

Fig. S73  $^{13}\text{C}$  NMR spectrum of **12e** (126 MHz) in  $\text{CDCl}_3$ .

# Generic Display Report

## Analysis Info

Analysis Name D:\Data\syn1\kubo20201219\#13\_Exp92\_1.d  
Method APCI\_pos\_DIP.m  
Sample Name #13\_Exp92\_1  
Comment Cap 150  
Hex 400

Acquisition Date 12/20/2020 4:04:05 AM

Operator BDAL@DE  
Instrument micrOTOF

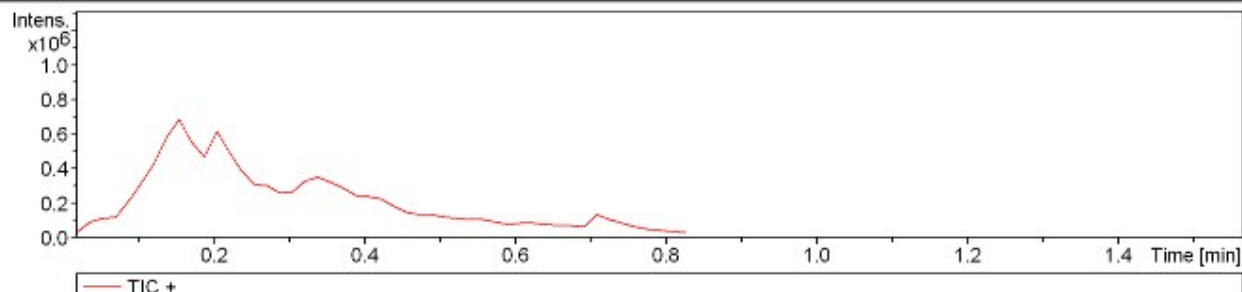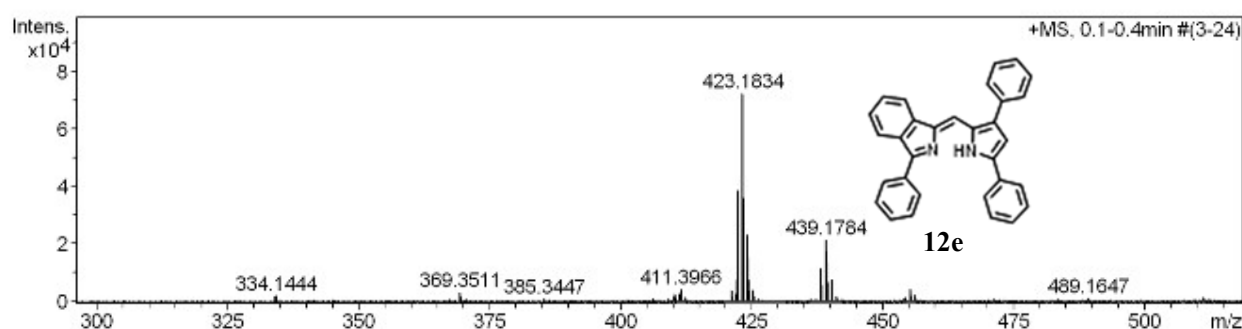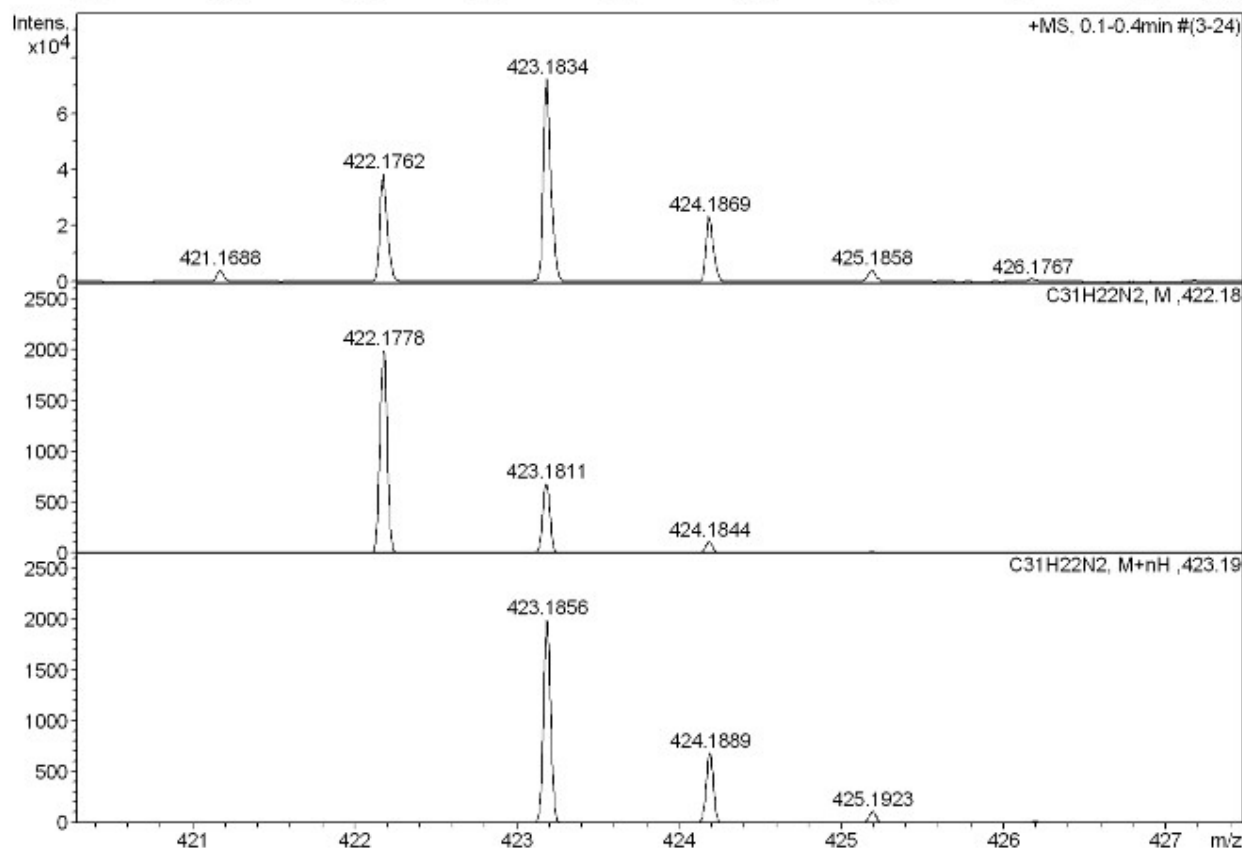

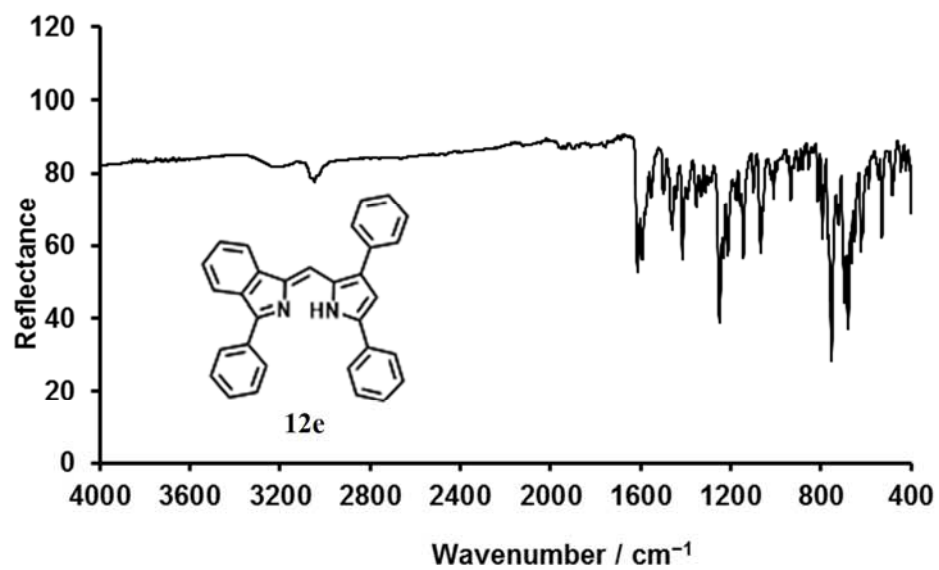

Fig. S75 ATR-FT-IR spectrum of 12e.

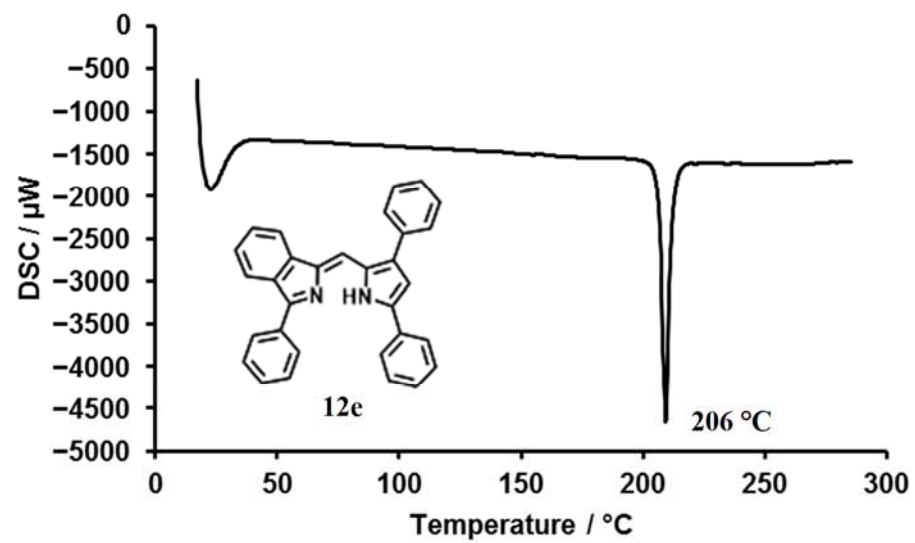

Fig. S76 DSC plots of 12e.

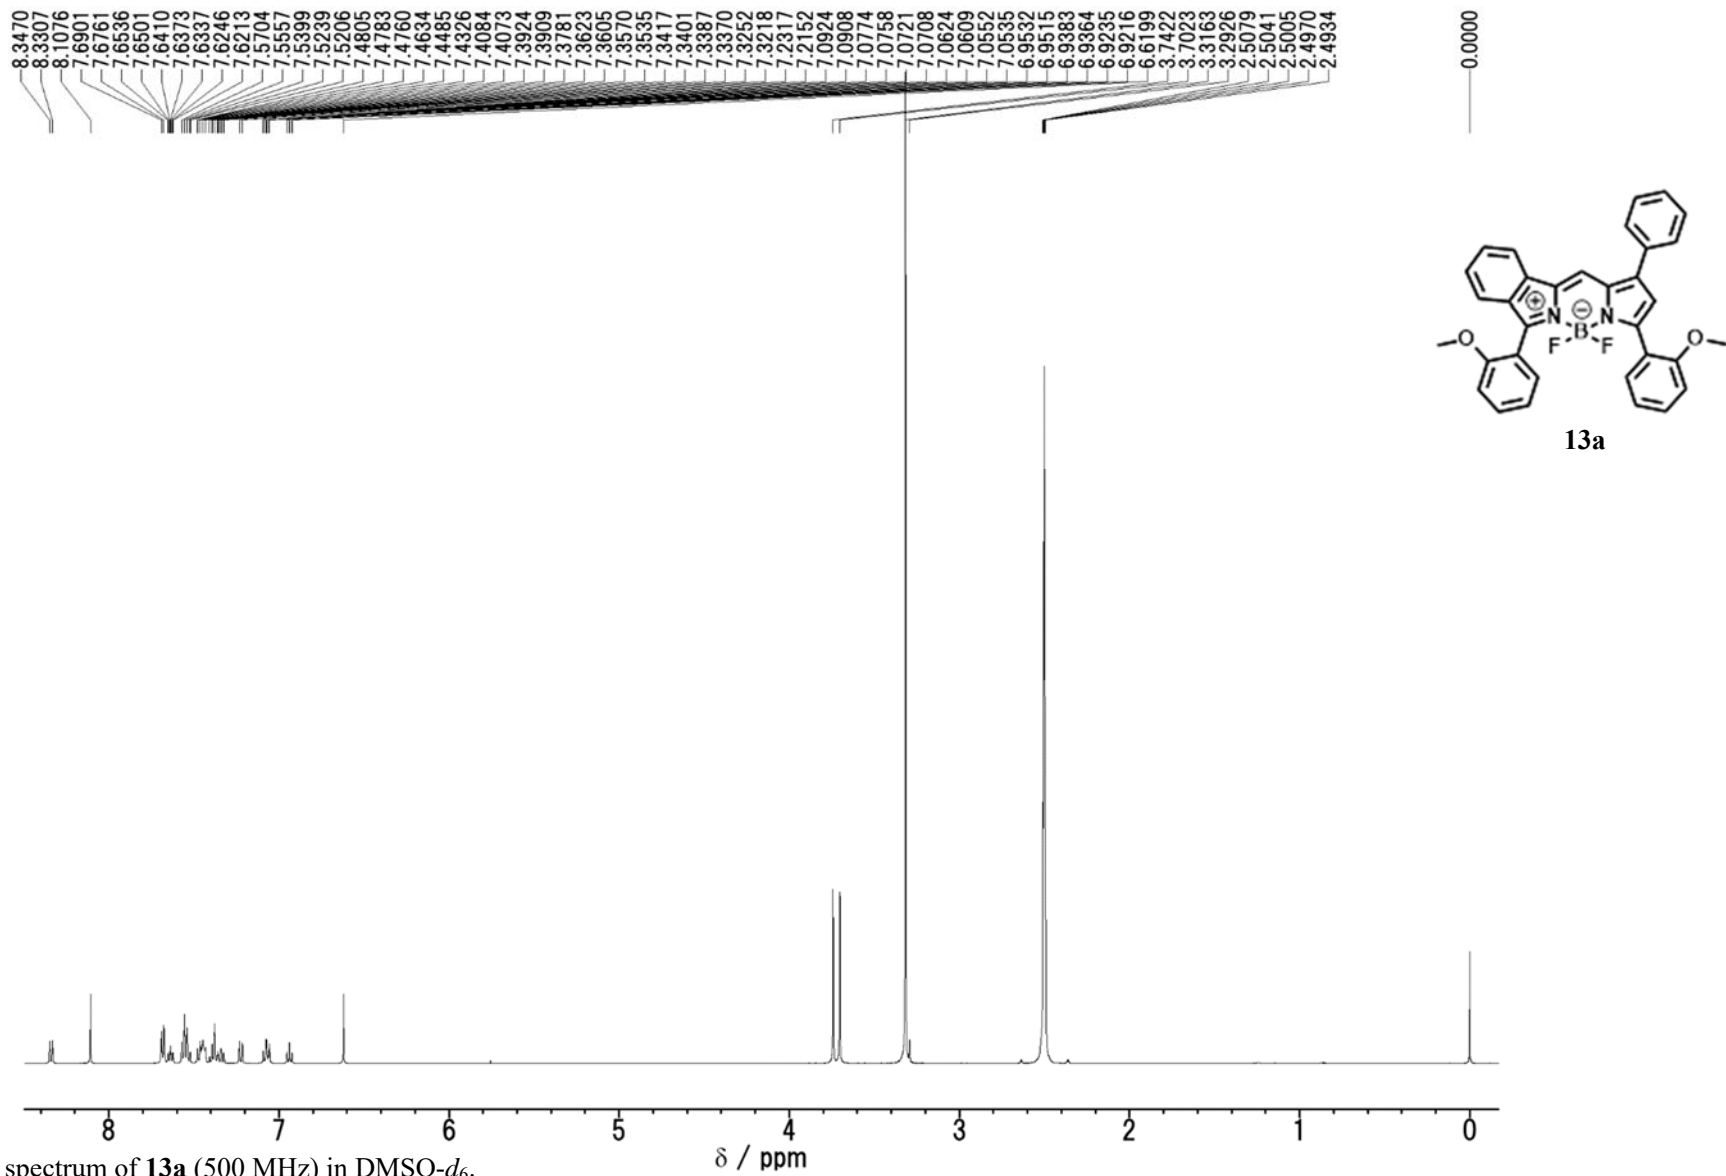

Fig. S77 <sup>1</sup>H NMR spectrum of **13a** (500 MHz) in DMSO-*d*<sub>6</sub>.

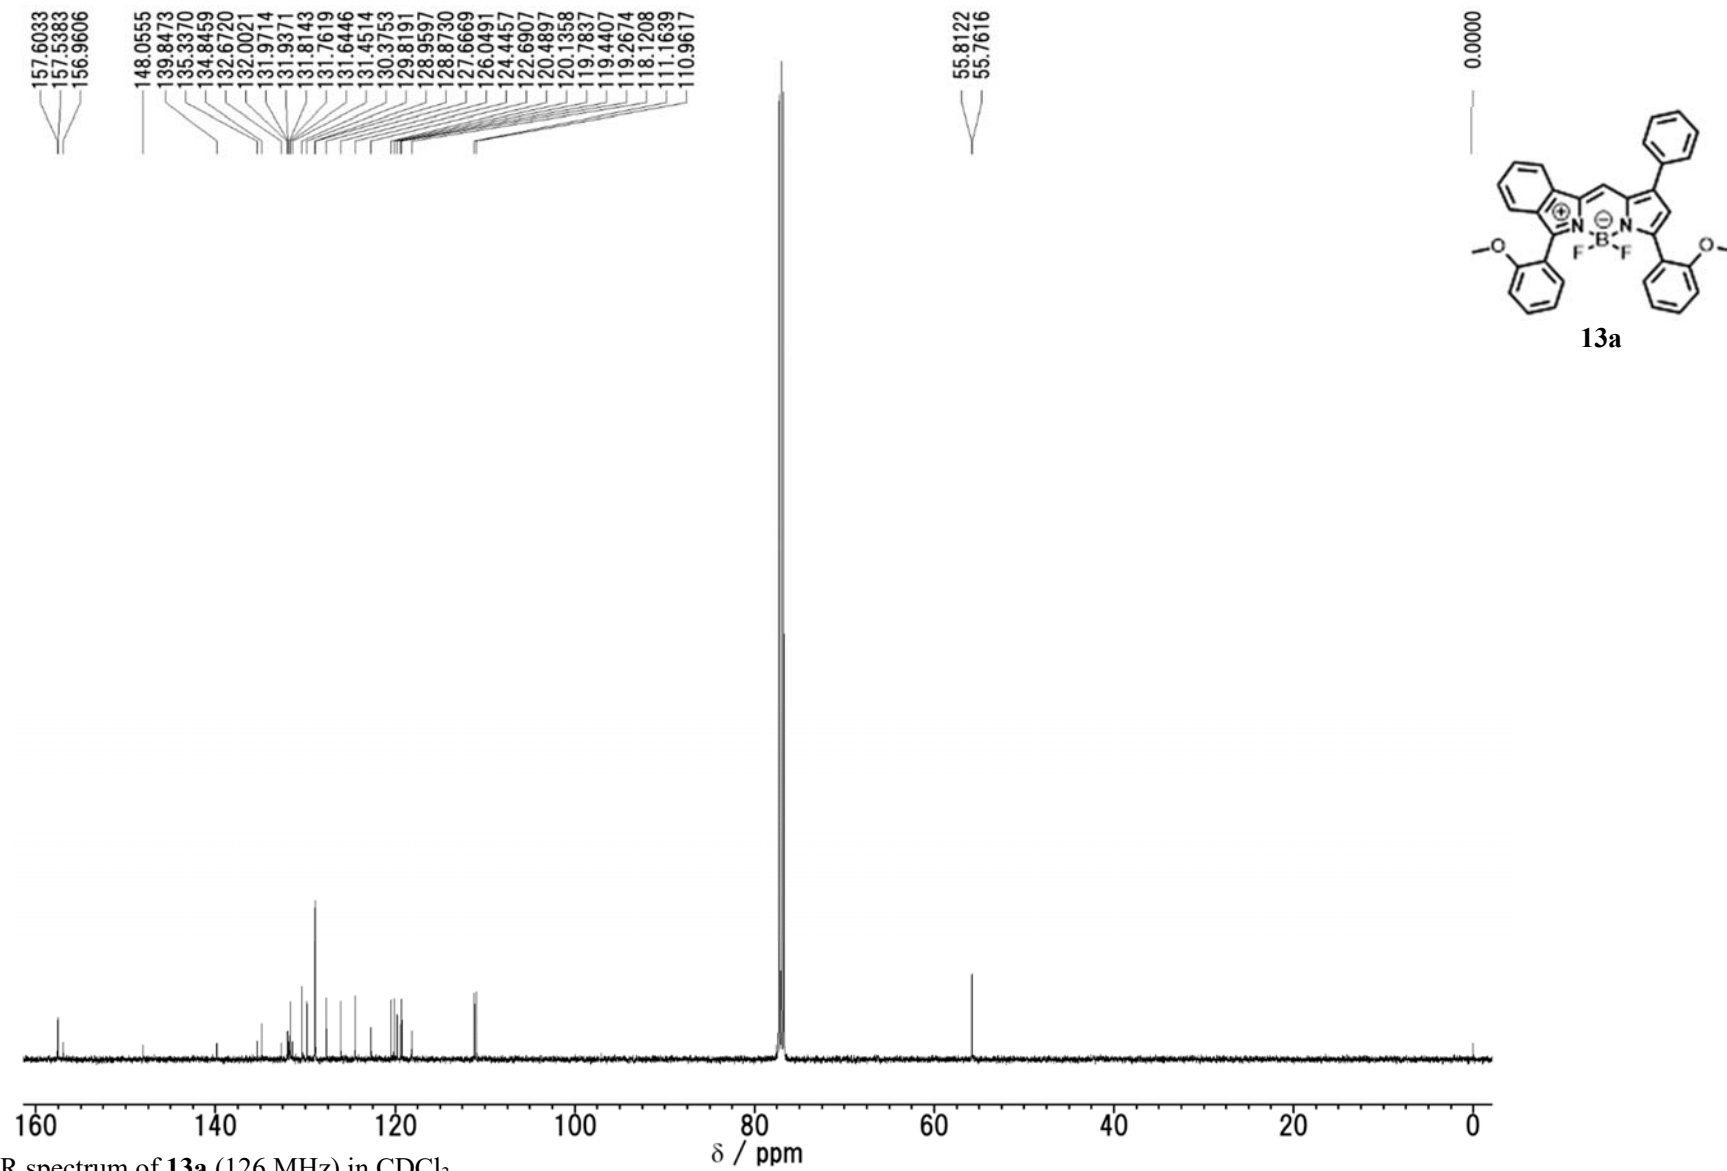

**Fig. S78**  $^{13}\text{C}$  NMR spectrum of **13a** (126 MHz) in  $\text{CDCl}_3$ .

# Generic Display Report

## Analysis Info

Analysis Name D:\Data\syn1\kubo20201219\#2\_Exp46\_1.d  
Method APCI\_pos\_DIP.m  
Sample Name #2\_Exp46\_1  
Comment Cap 150  
Hex 400

Acquisition Date 12/20/2020 2:06:51 AM

Operator BDAL@DE  
Instrument micrOTOF

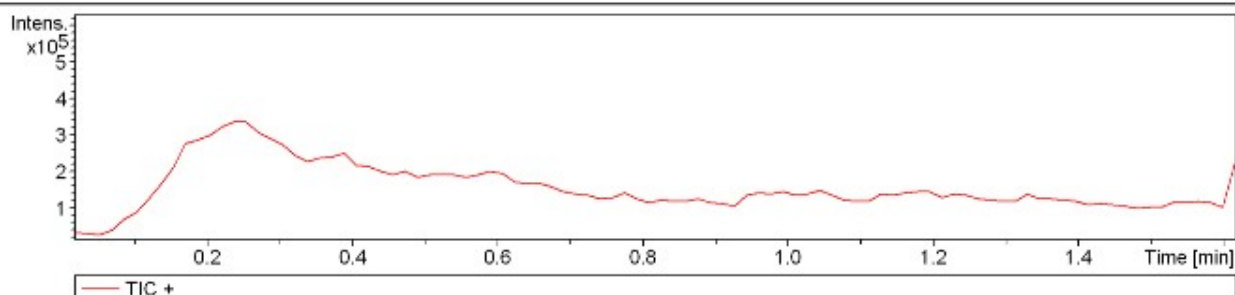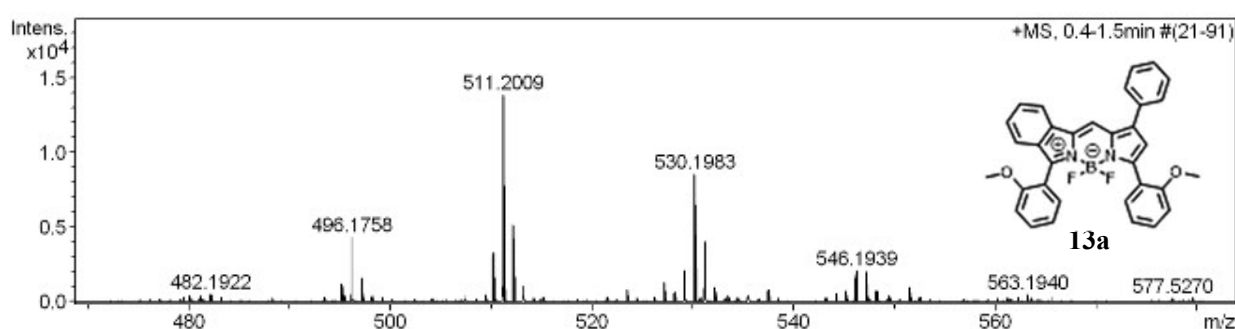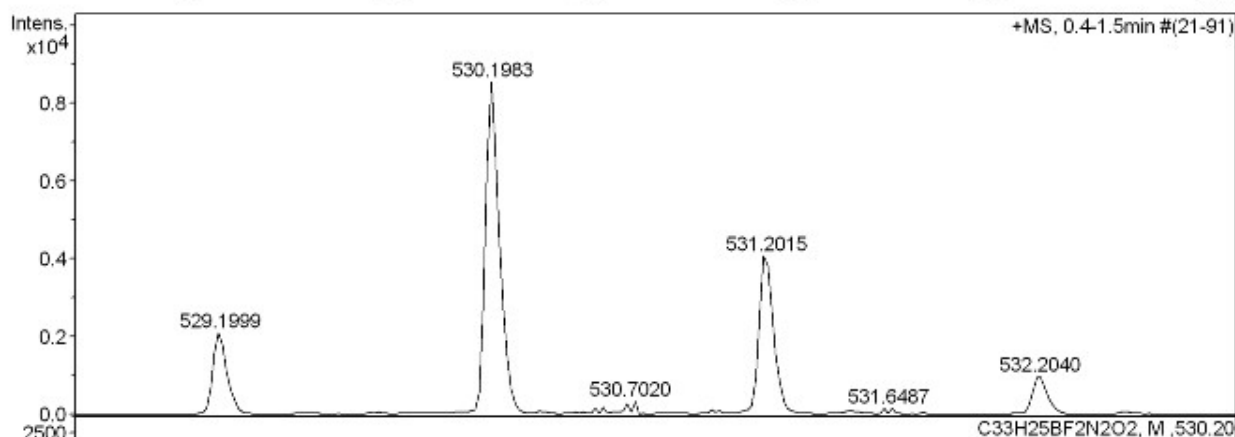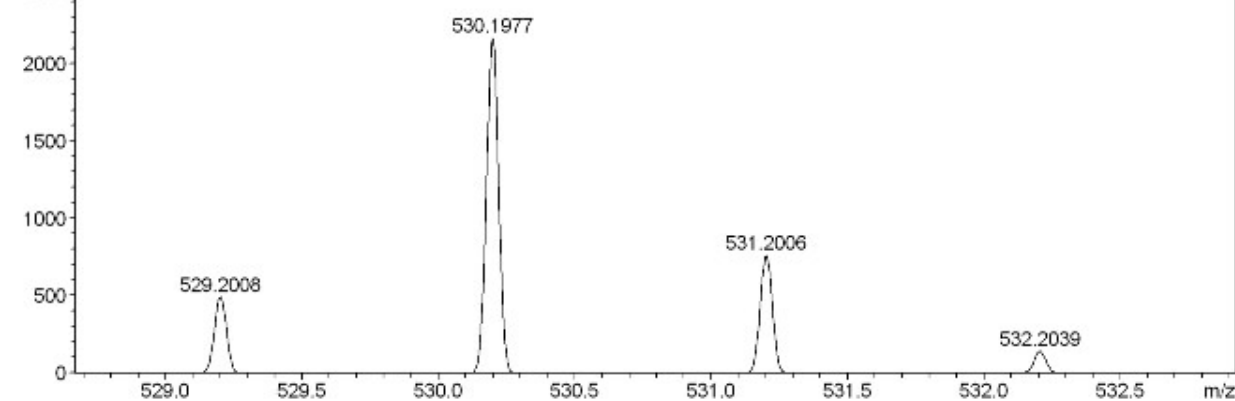

Fig. S79 High resolution of APCI mass spectrum (positive mode) of **13a**.  
S-70

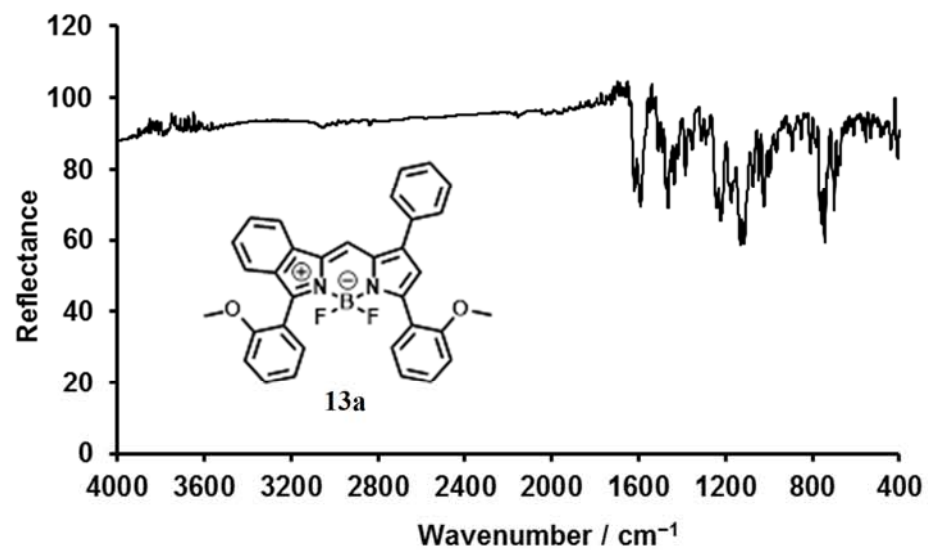

Fig. S80 ATR-FT-IR spectrum of 13a.

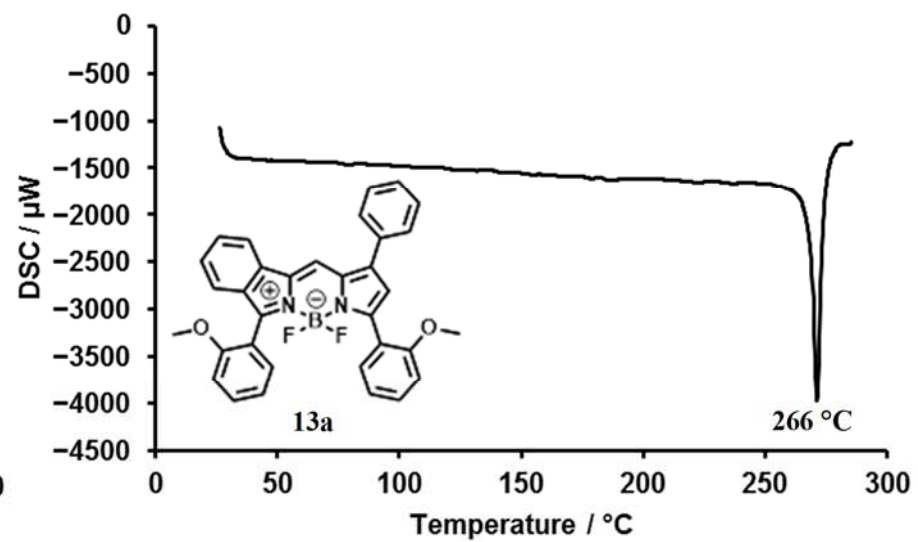

Fig. S81 DSC plots of 13a.

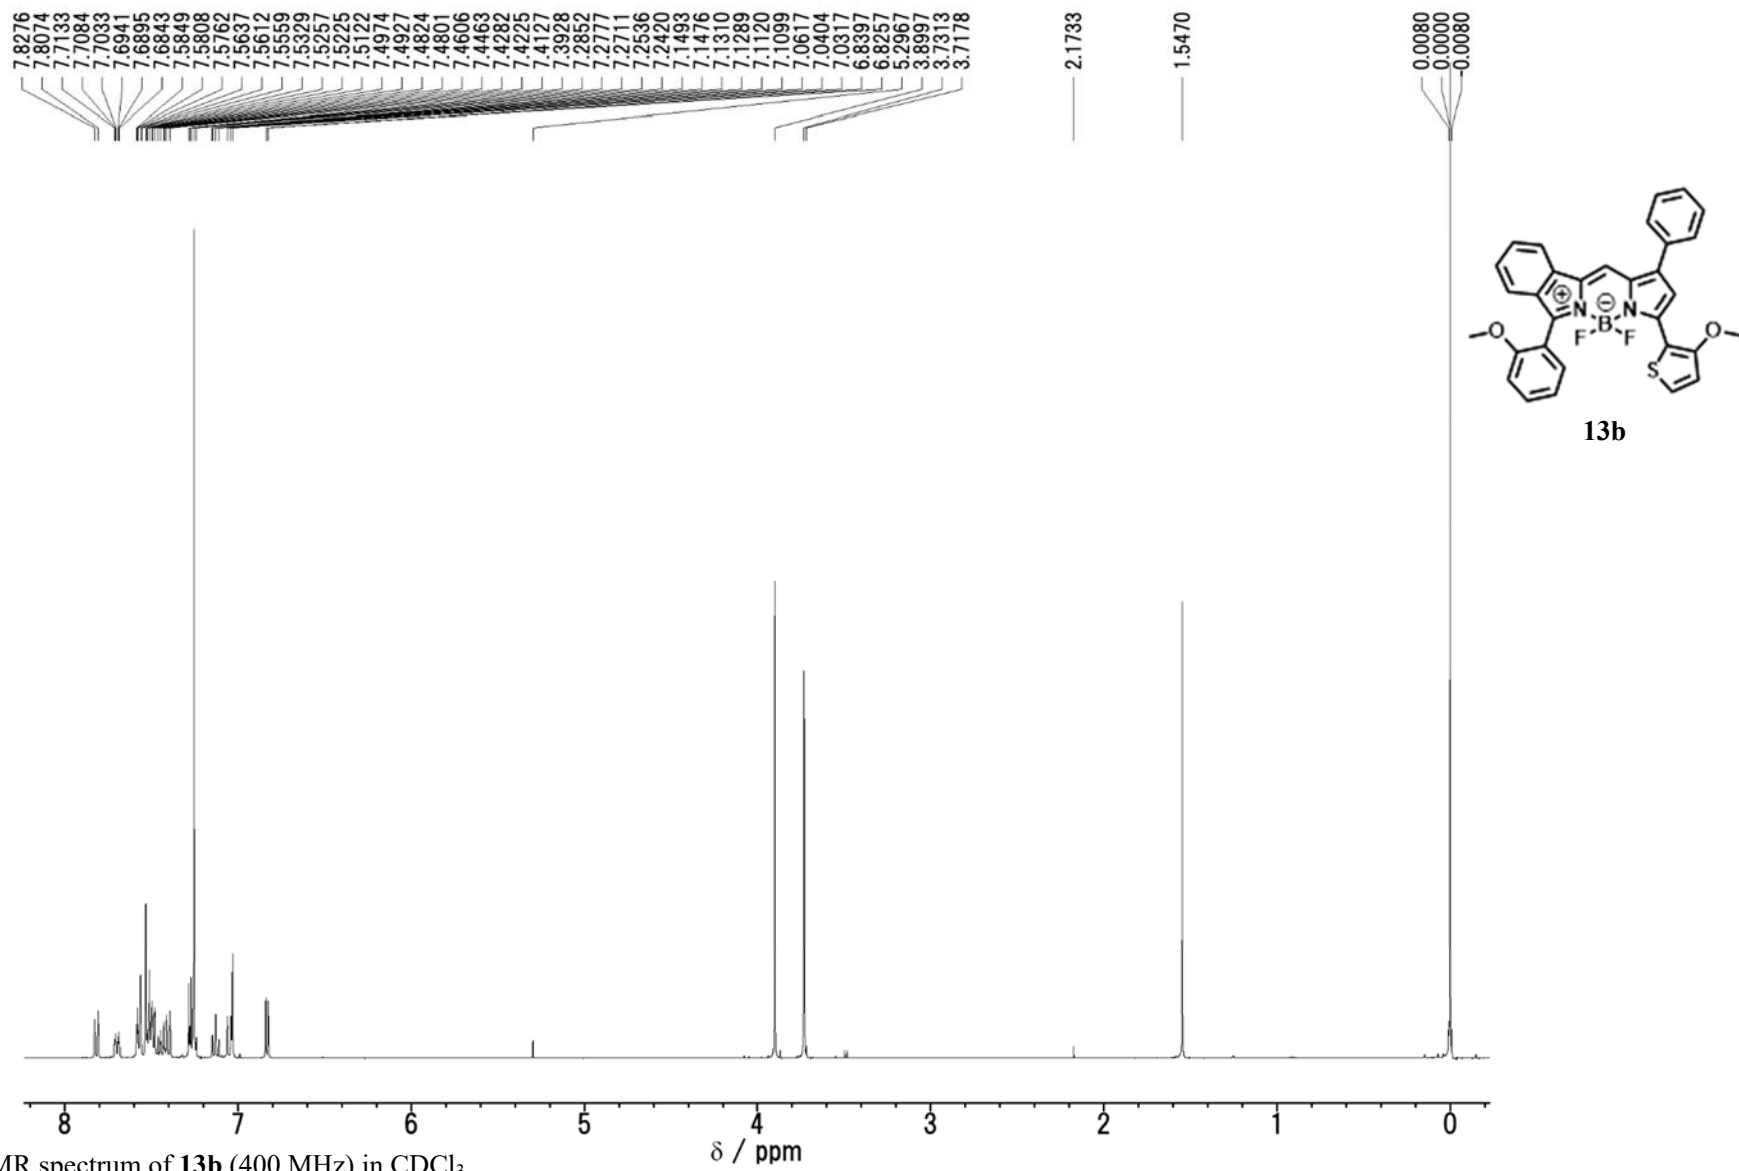

Fig. S82  $^1\text{H}$  NMR spectrum of **13b** (400 MHz) in  $\text{CDCl}_3$ .



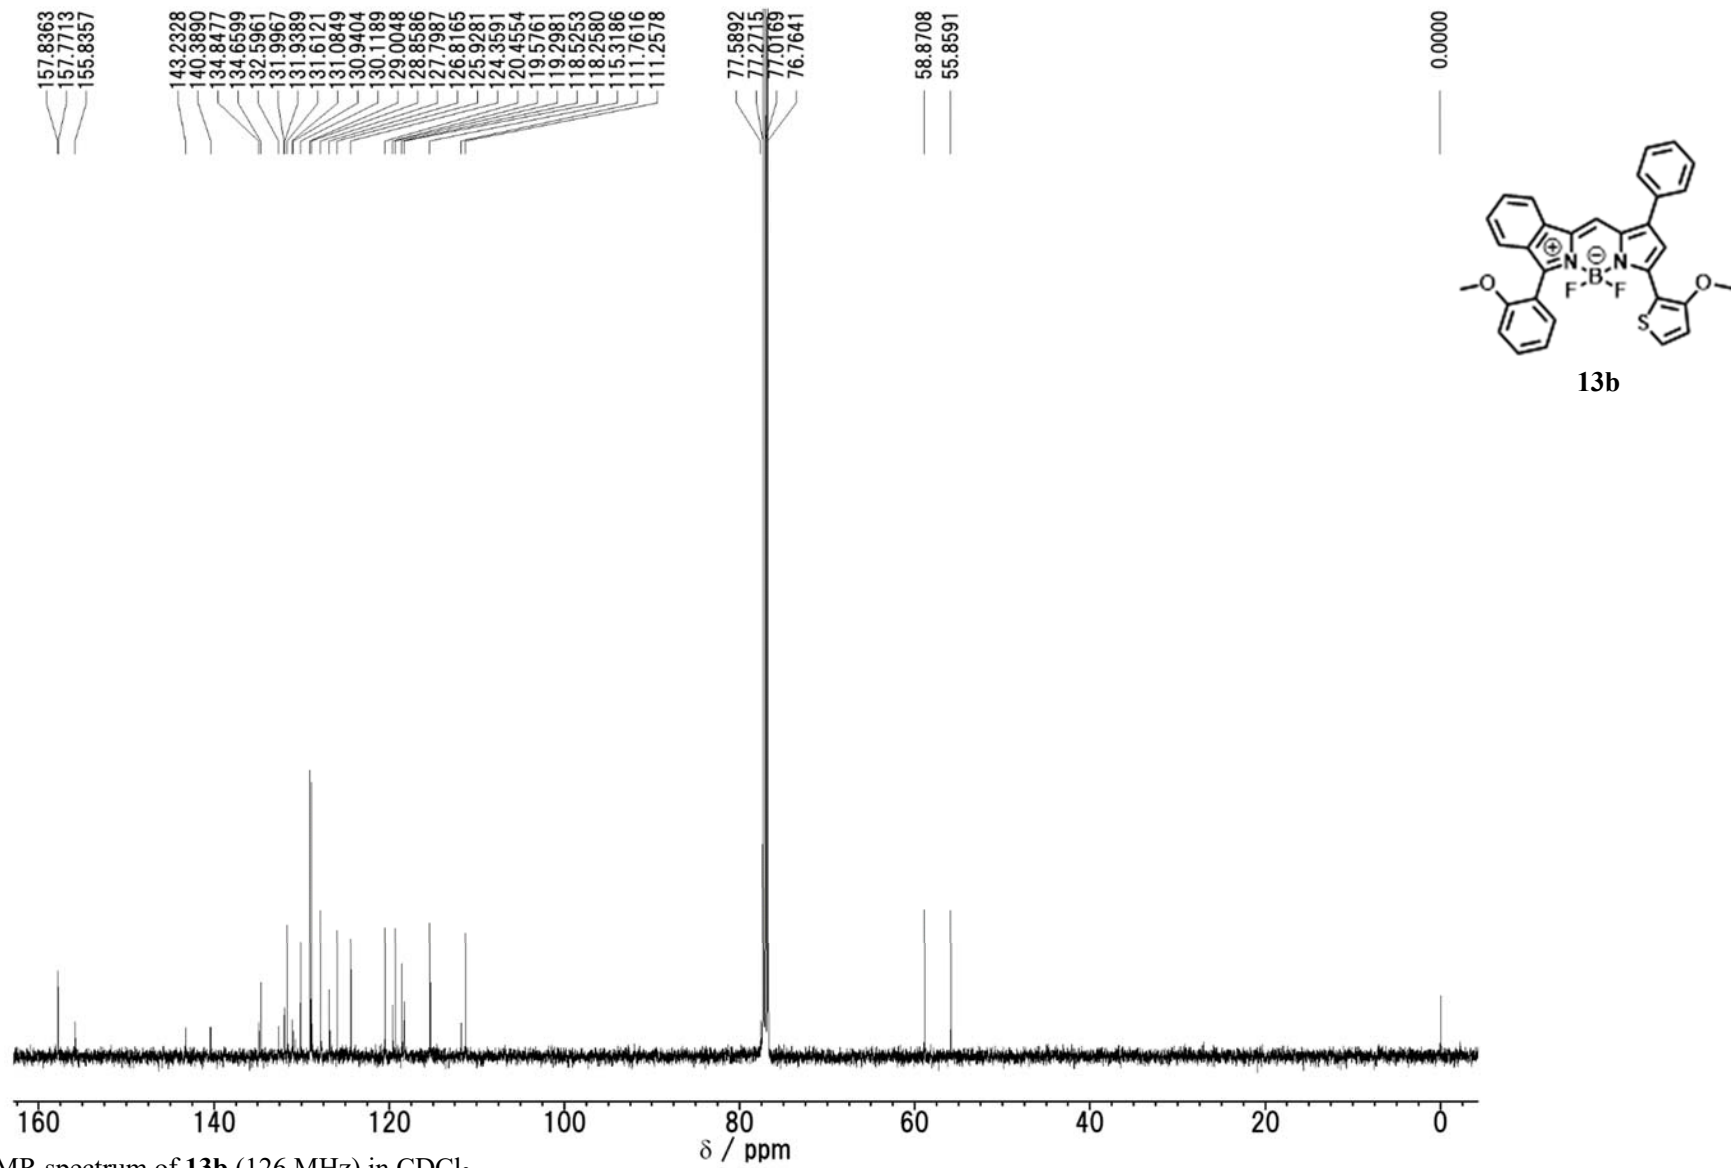

**Fig. S83**  $^{13}\text{C}$  NMR spectrum of **13b** (126 MHz) in  $\text{CDCl}_3$ .

1.8221  
1.6240  
1.4244

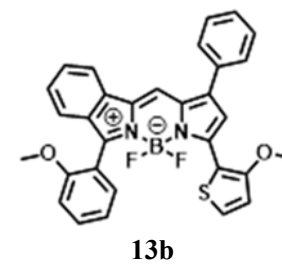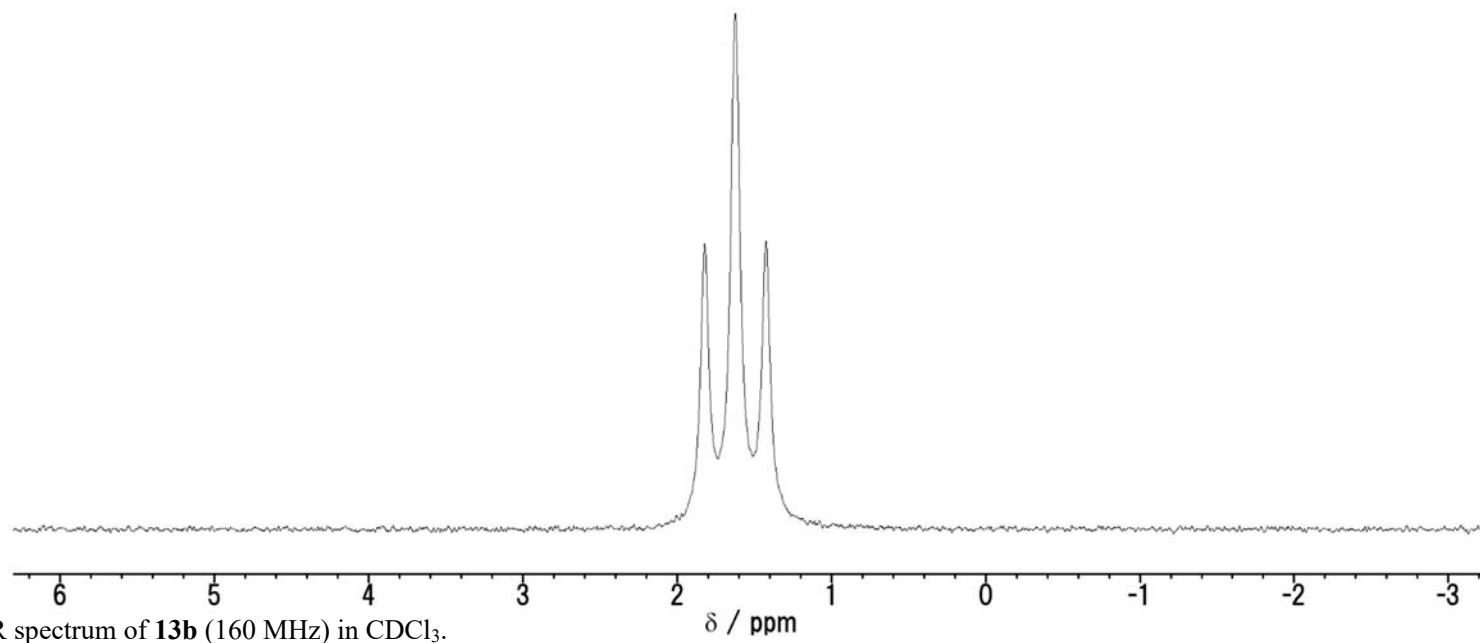

Fig. S84 <sup>11</sup>B NMR spectrum of **13b** (160 MHz) in CDCl<sub>3</sub>.

# Generic Display Report

## Analysis Info

Analysis Name D:\Data\syn1\kubo20201219\#5\_Exp183\_1.d  
Method APCI\_pos\_DIP.m  
Sample Name #5\_Exp183\_1  
Comment Cap 150  
Hex 400

Acquisition Date 12/20/2020 2:44:50 AM

Operator BDAL@DE  
Instrument micrOTOF

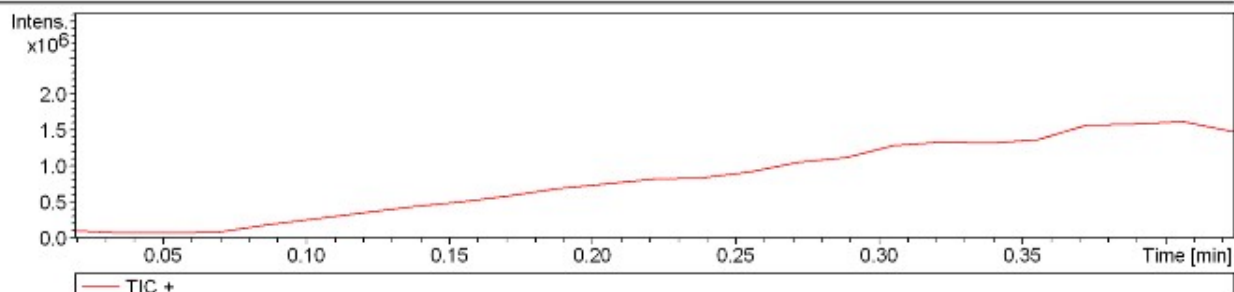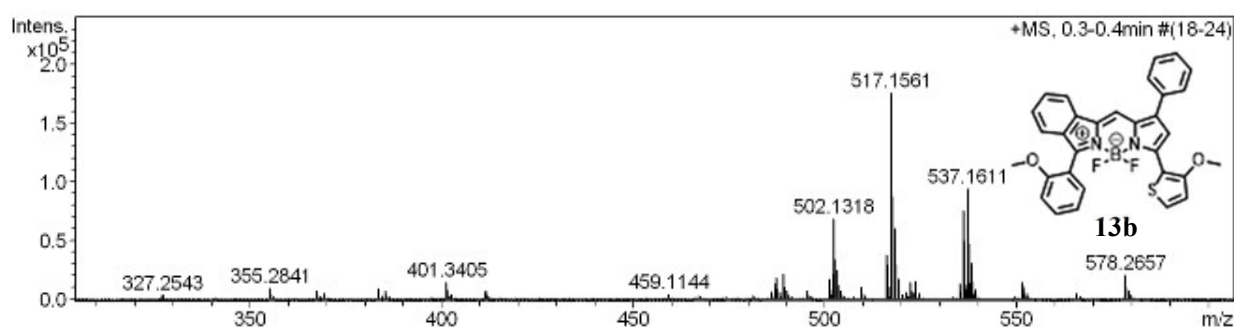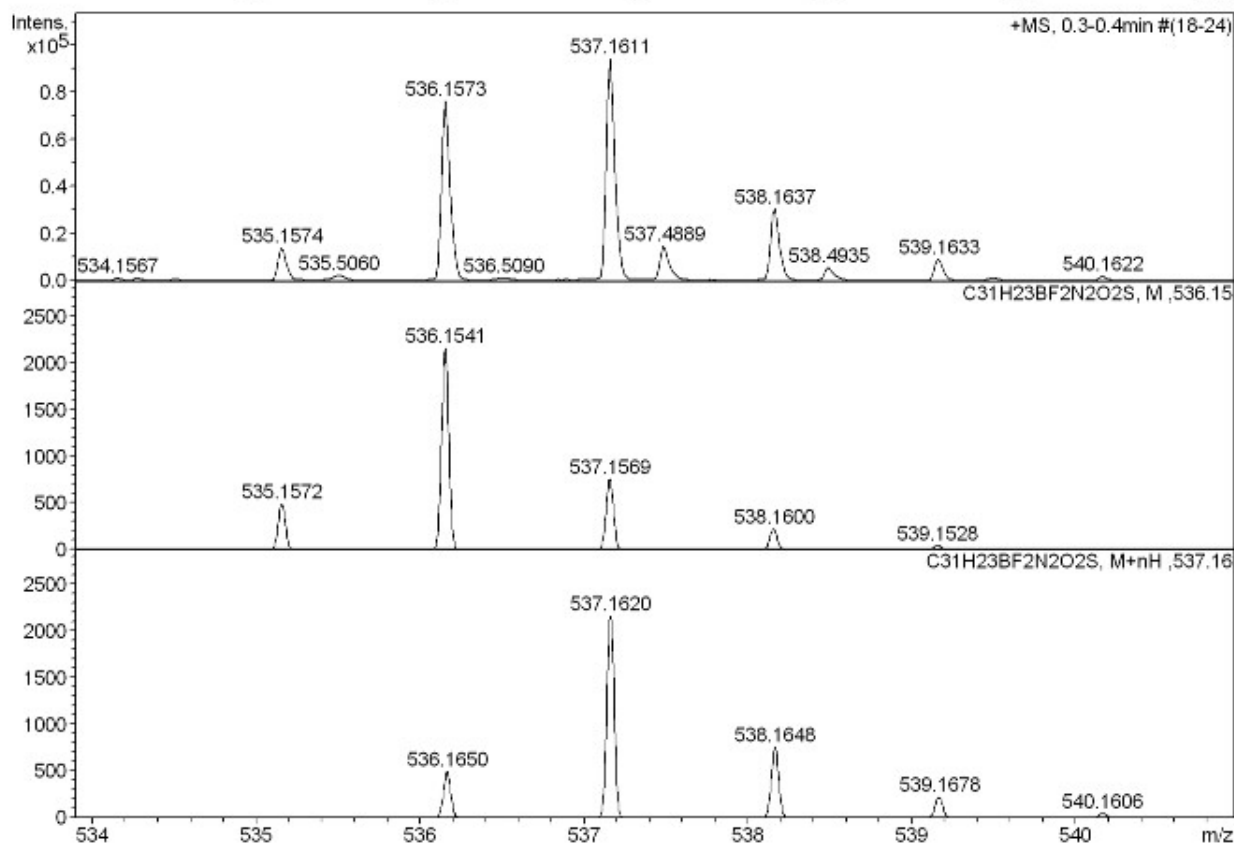

Fig. S85 High resolution of APCI mass spectrum (positive mode) of **13b**.

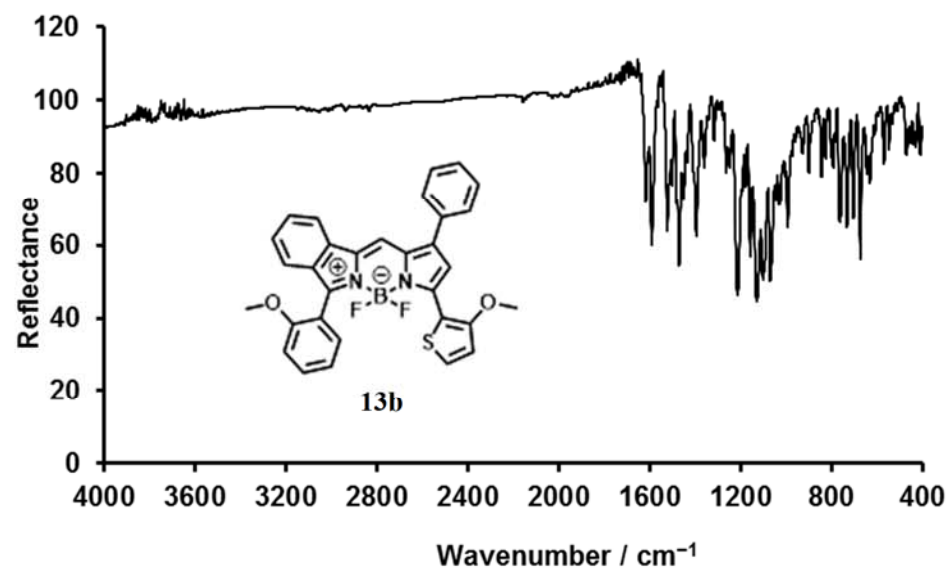

Fig. S86 ATR-FT-IR spectrum of **13b**.

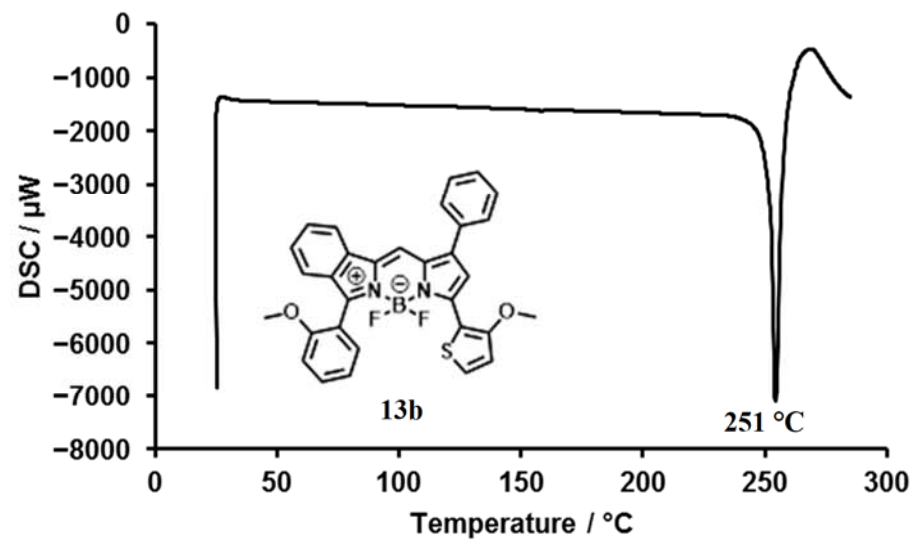

Fig. S87 DSC plots of **13b**.

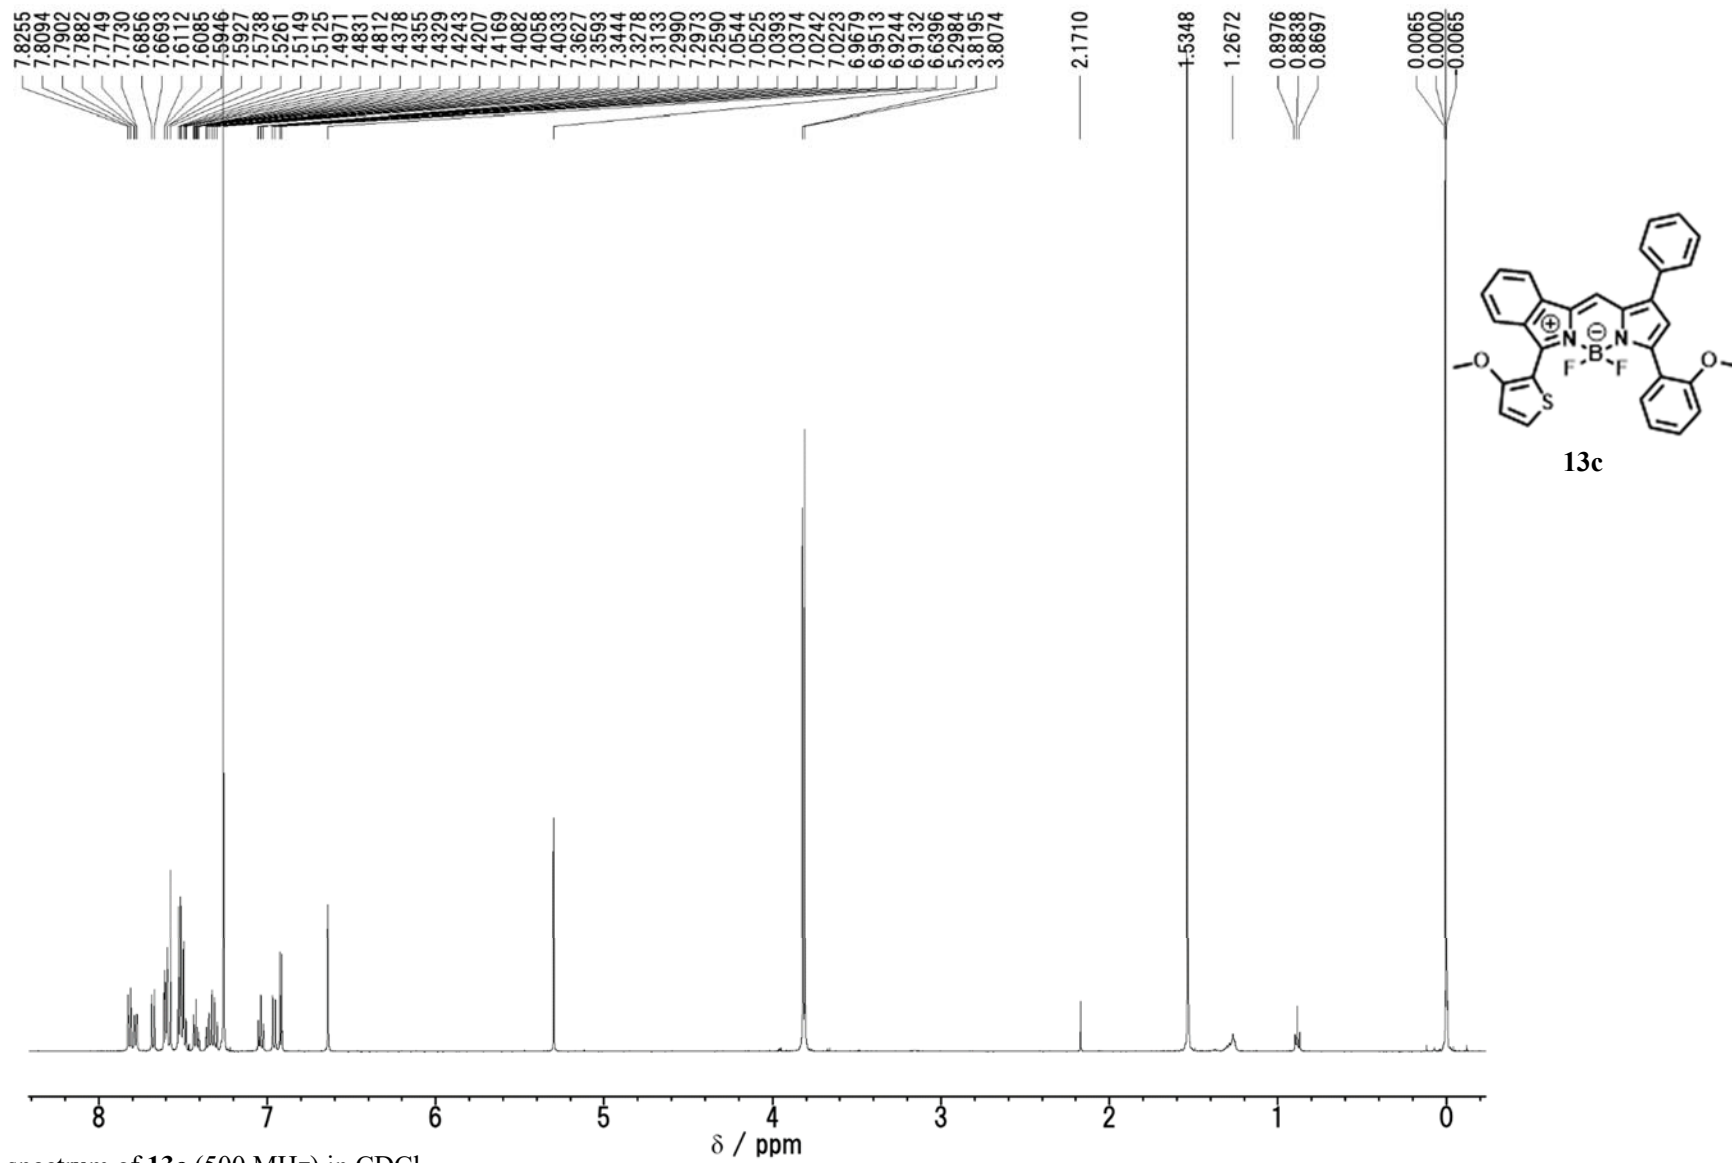

Fig. S88  $^1\text{H}$  NMR spectrum of **13c** (500 MHz) in  $\text{CDCl}_3$ .

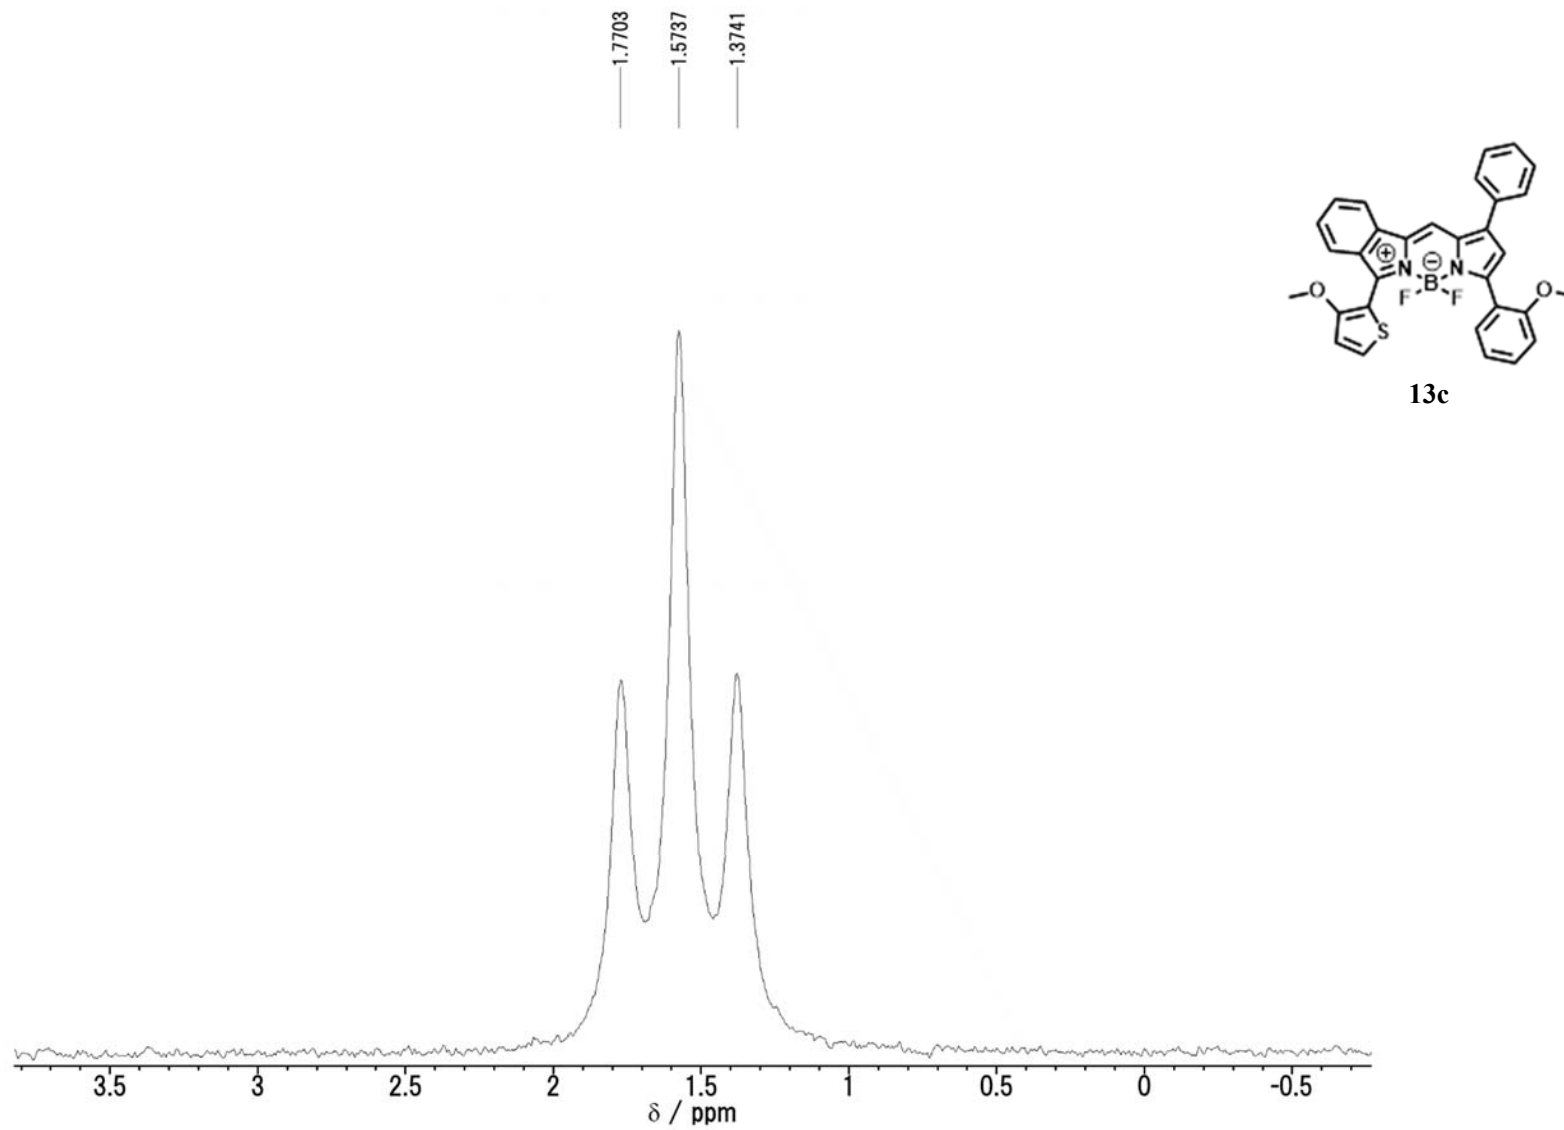

**Fig. S89**  $^{11}\text{B}$  NMR spectrum of **13c** (160 MHz) in  $\text{CDCl}_3$ .

# Generic Display Report

## Analysis Info

Analysis Name D:\Data\syn1\kubo20201219\#8\_Exp54\_1.d  
Method APCI\_pos\_DIP.m  
Sample Name #8\_Exp54\_1  
Comment Cap 150  
Hex 400

Acquisition Date 12/20/2020 3:07:20 AM

Operator BDAL@DE  
Instrument micrOTOF

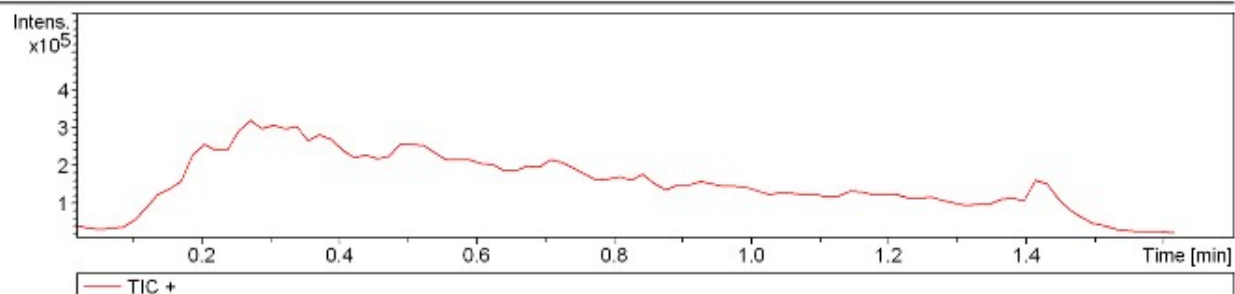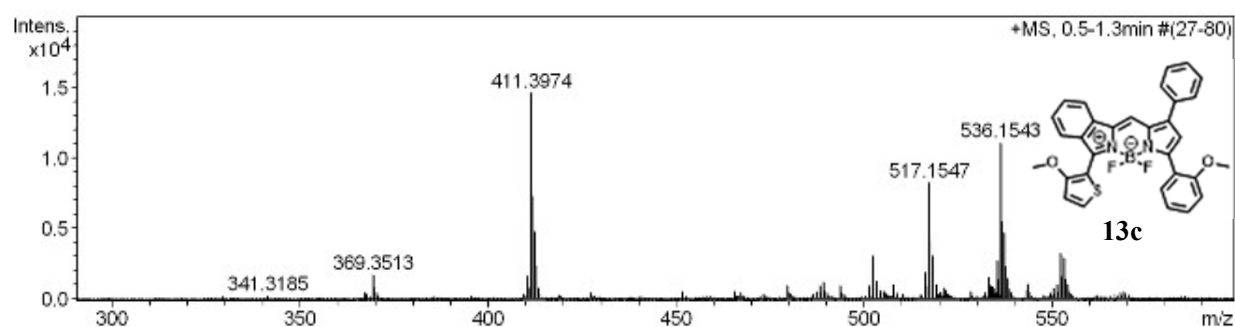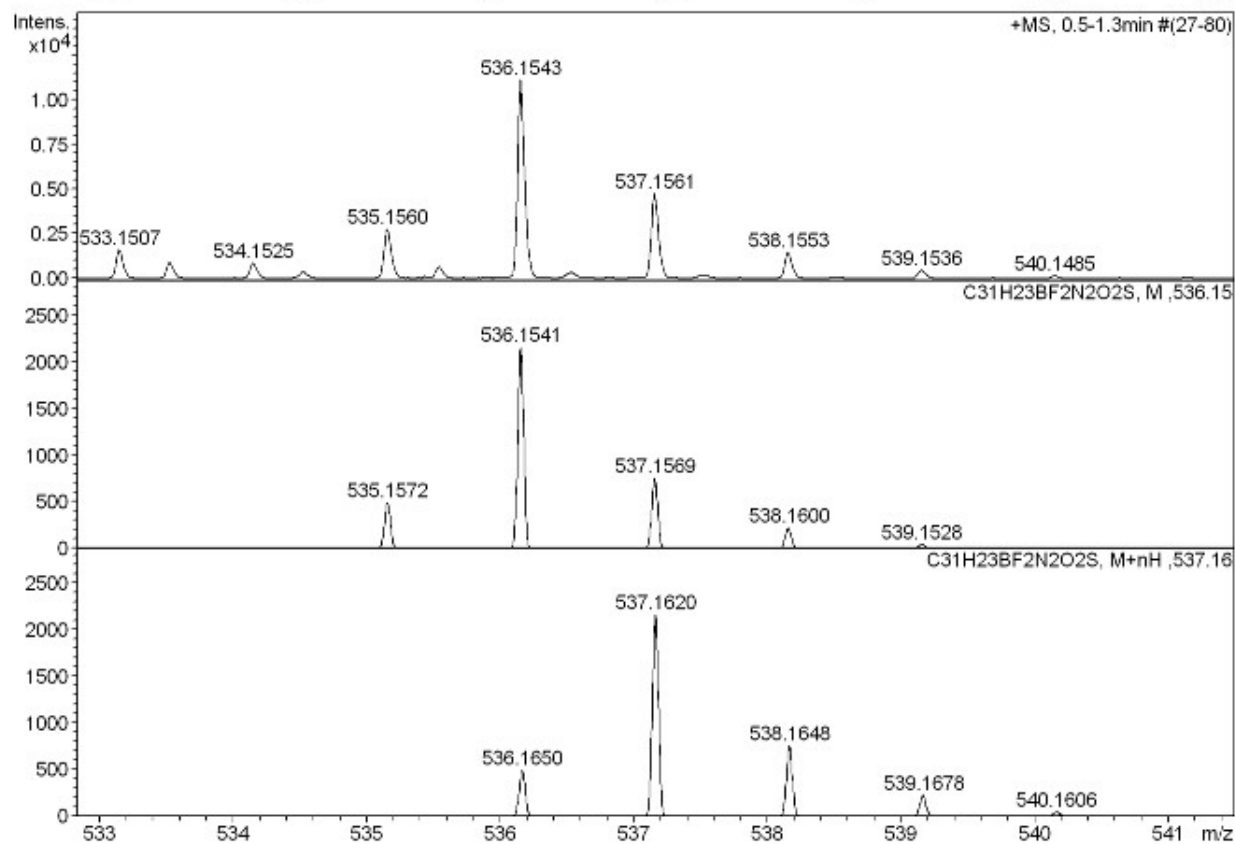

Fig. S90 High resolution of APCI mass spectrum (positive mode) of 13c.

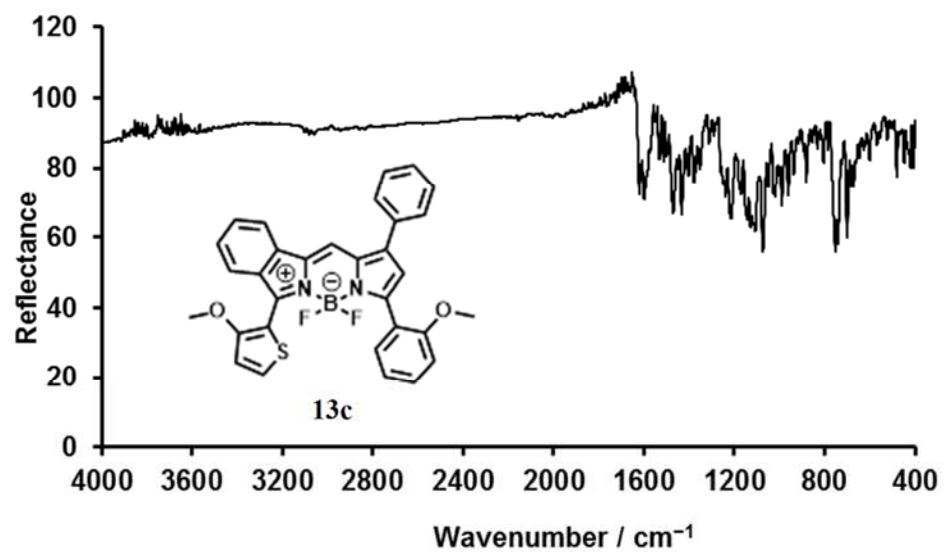

Fig. S91 ATR-FT-IR spectrum of 13c.

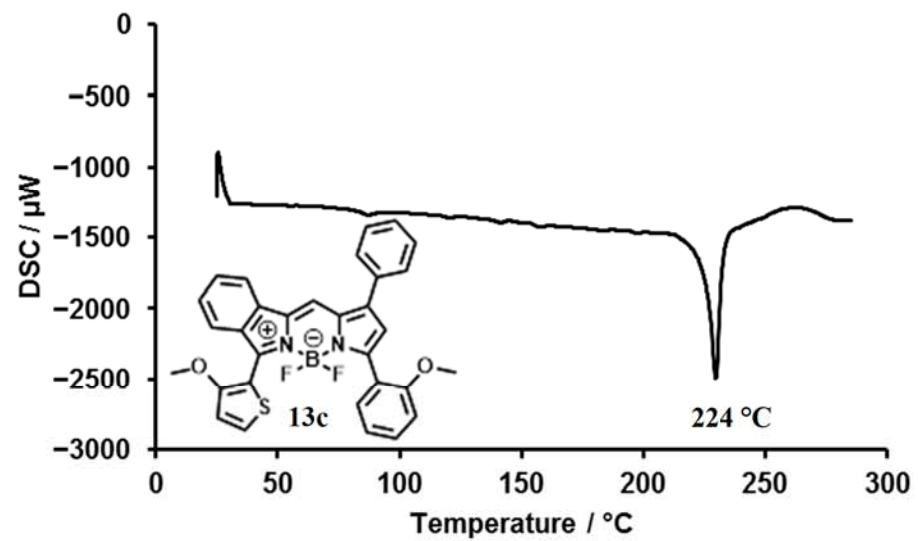

Fig. S92 DSC plots of 13c.



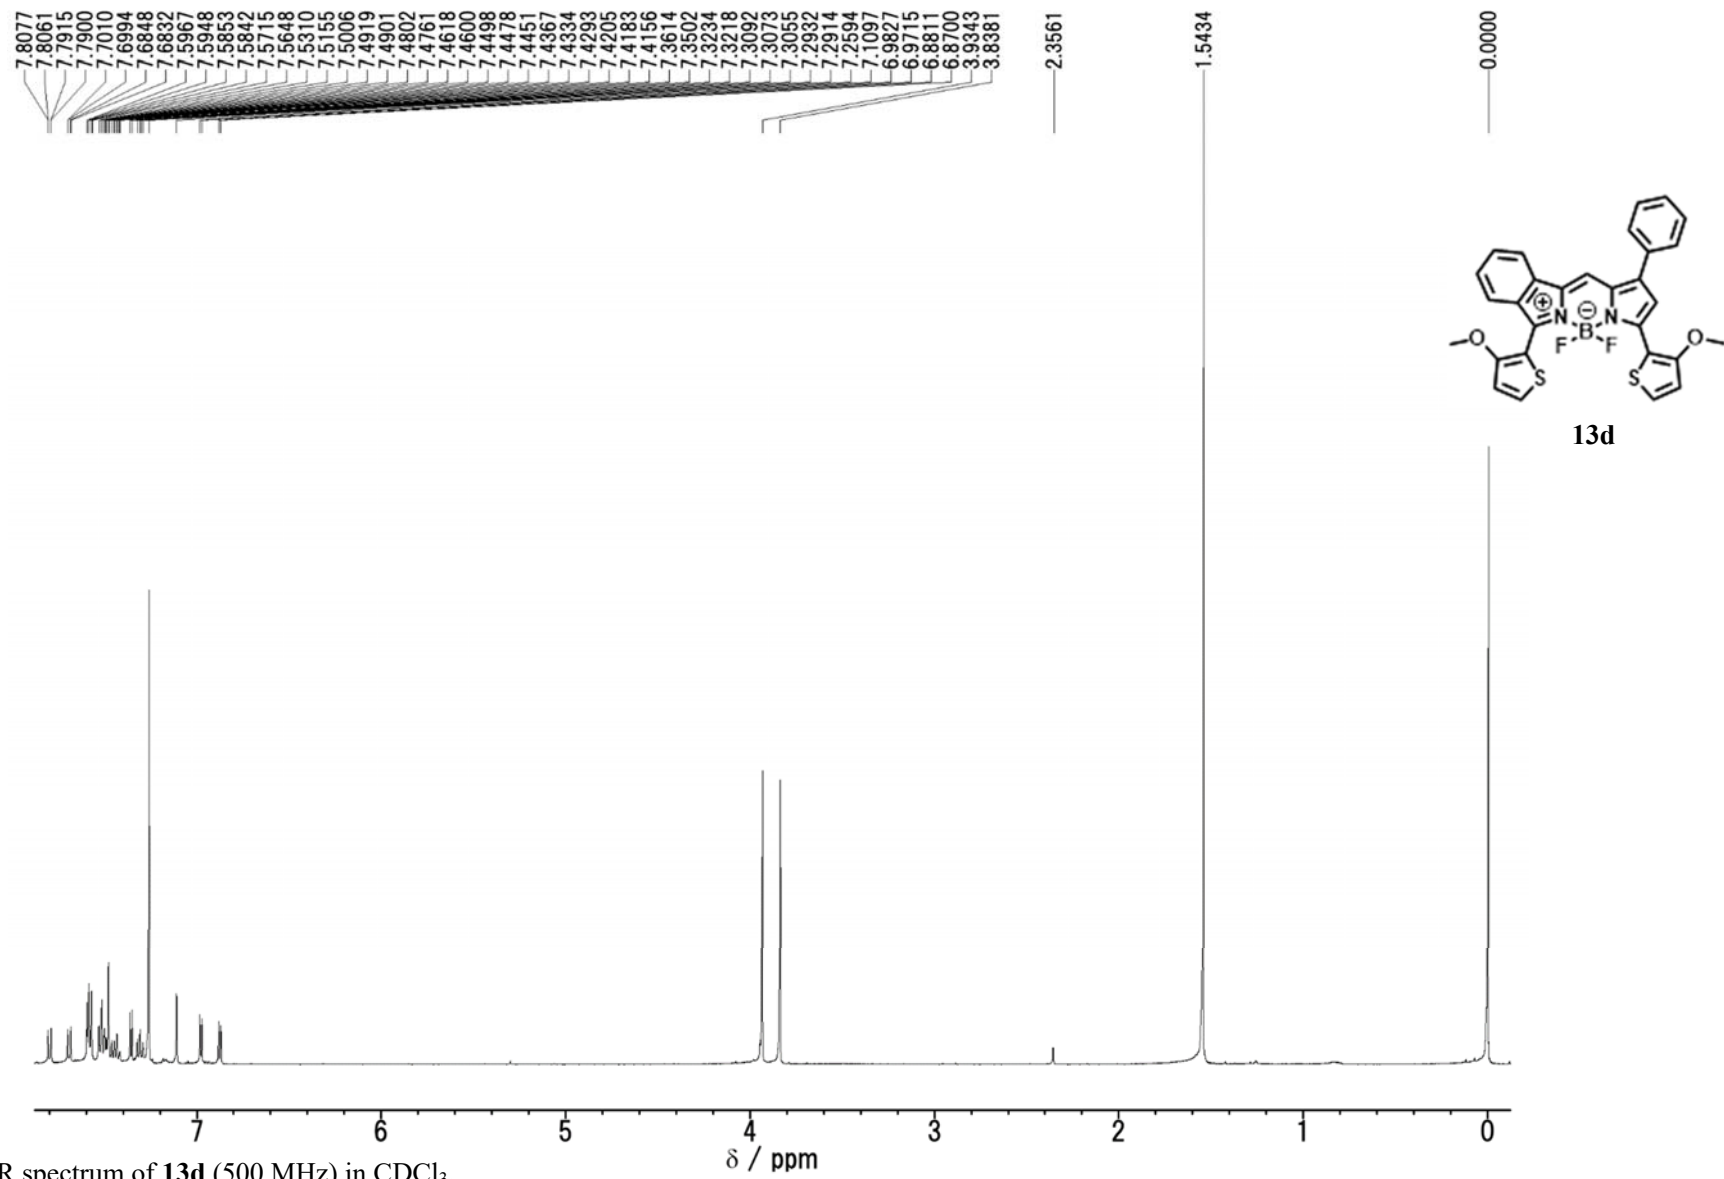

Fig. S93  $^1\text{H}$  NMR spectrum of **13d** (500 MHz) in  $\text{CDCl}_3$ .



# Generic Display Report

## Analysis Info

Analysis Name D:\Data\syn1\kubo20201219\#11\_Exp131\_1.d  
Method APCI\_pos\_DIP.m  
Sample Name #11\_Exp131\_1  
Comment Cap 70  
Hex 400

Acquisition Date 12/20/2020 3:48:32 AM

Operator BDAL@DE  
Instrument micrOTOF

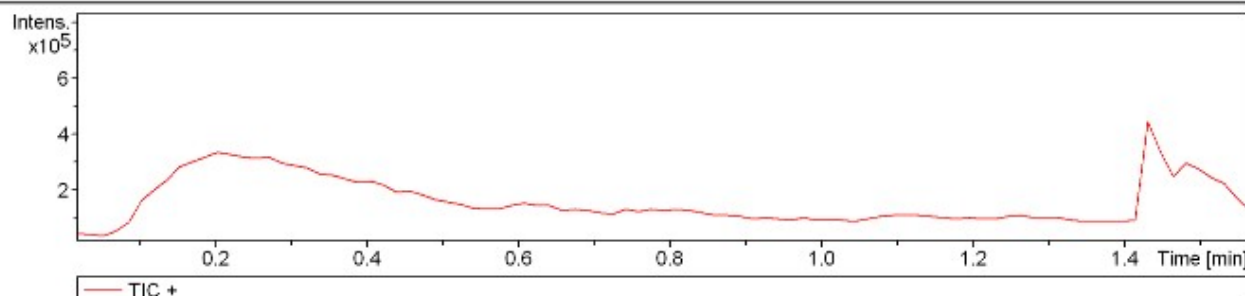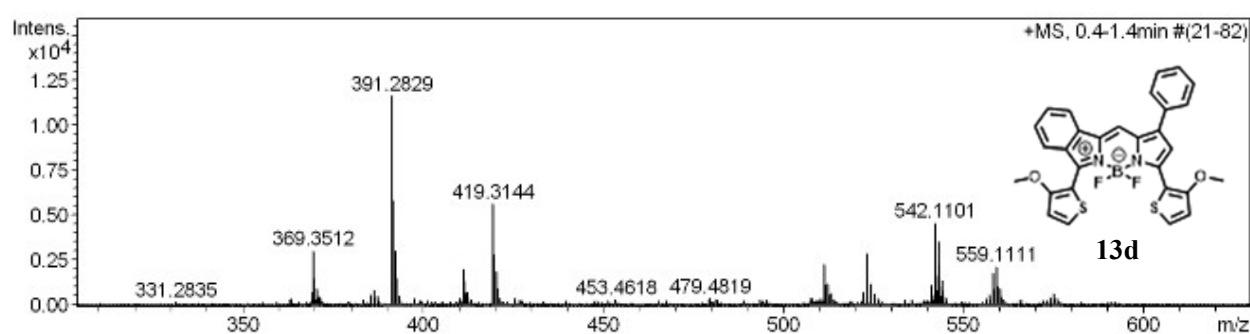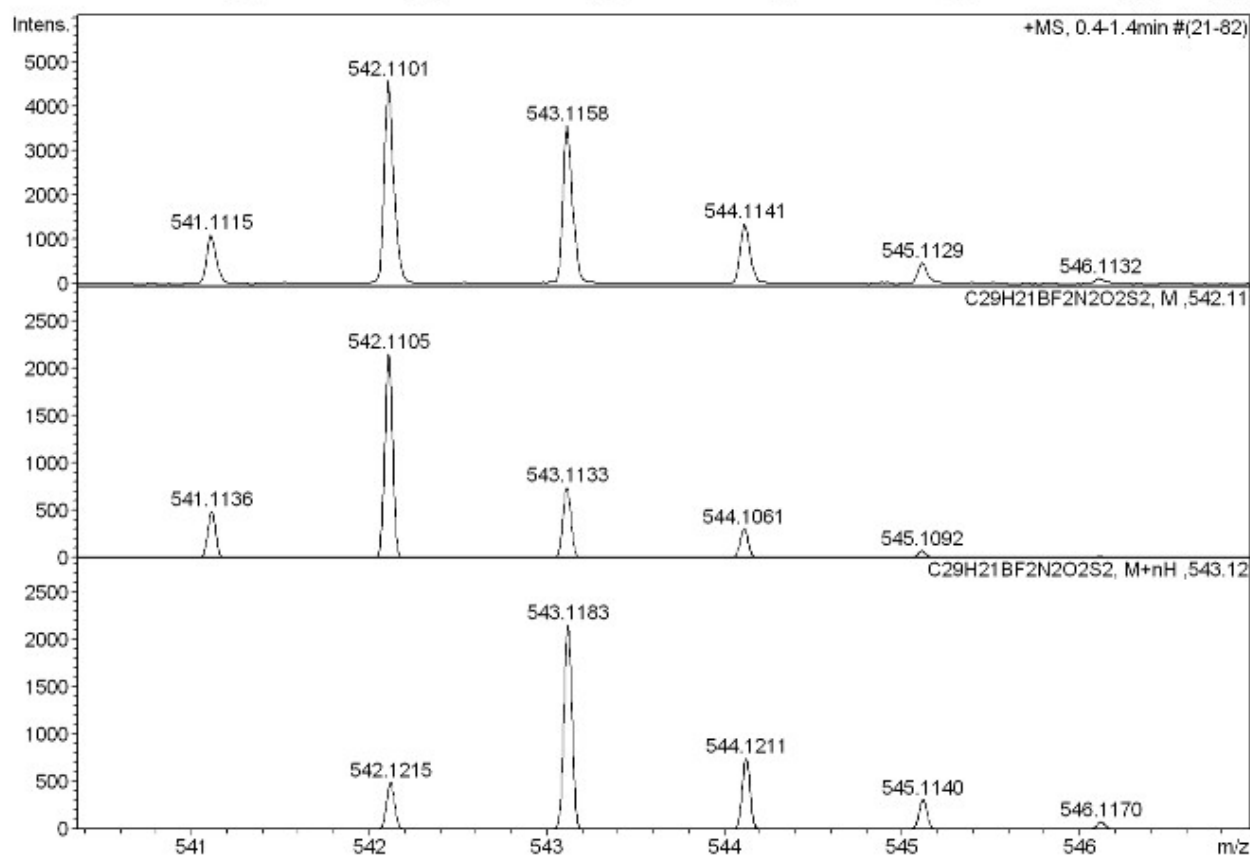

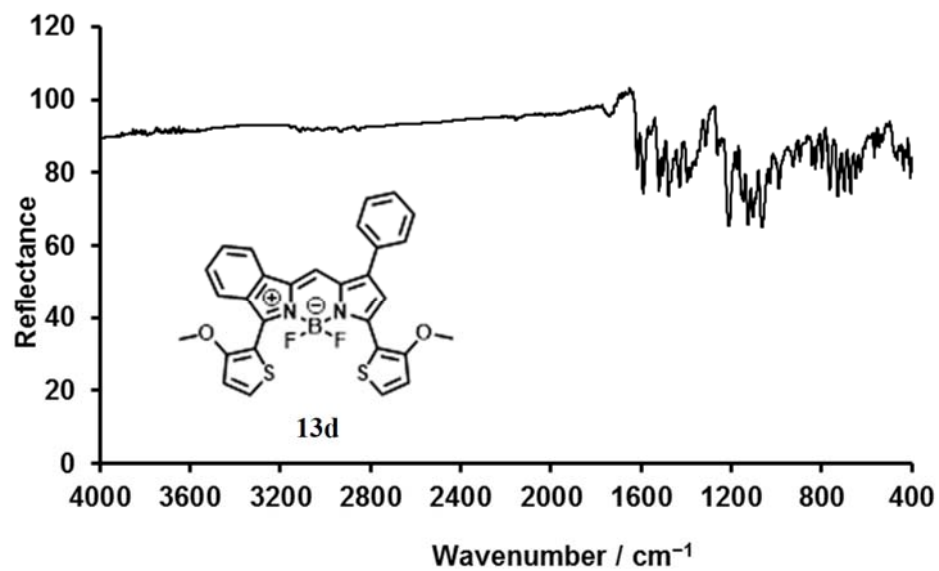

Fig. S96 ATR-FT-IR spectrum of 13d.

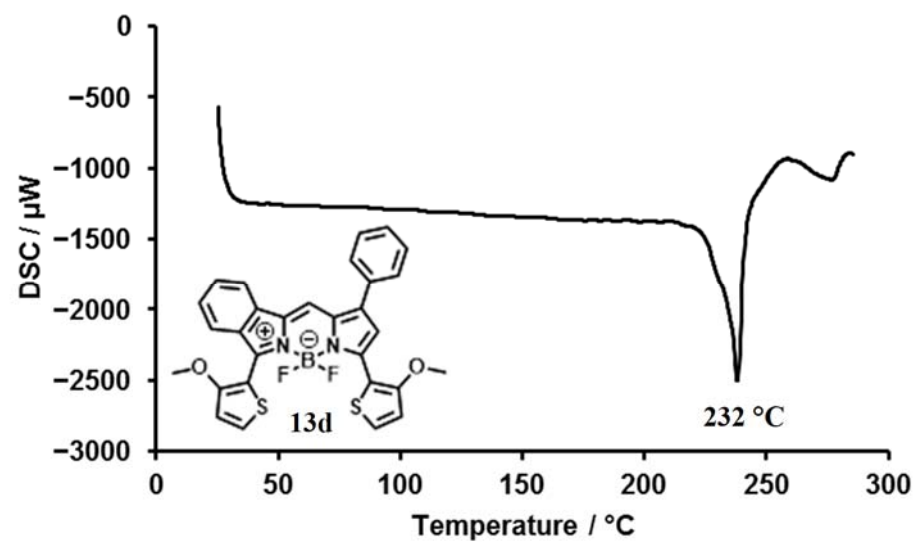

Fig. S97 DSC plots of 13d.

Single crystal X-ray diffraction study for **2**  
(CCDC No. 2024003)

#### Data Collection

A green platelet crystal of  $C_{29}H_{17}BN_2O_2S$  having approximate dimensions of  $0.450 \times 0.190 \times 0.080$  mm was mounted on a glass fiber. All measurements were made on a Rigaku XtaLAB mini diffractometer using graphite monochromated Mo-K $\alpha$  radiation.

The crystal-to-detector distance was 50.03 mm.

Cell constants and an orientation matrix for data collection corresponded to a primitive triclinic cell with dimensions:

$$\begin{array}{ll} a = 10.254(7) \text{ \AA} & \alpha = 65.218(16)^\circ \\ b = 10.429(6) \text{ \AA} & \beta = 86.33(2)^\circ \\ c = 11.673(7) \text{ \AA} & \gamma = 77.330(19)^\circ \\ V = 1105.2(12) \text{ \AA}^3 & \end{array}$$

For  $Z = 2$  and F.W. = 468.34, the calculated density is  $1.407 \text{ g/cm}^3$ . Based on a statistical analysis of intensity distribution, and the successful solution and refinement of the structure, the space group was determined to be:

P-1 (#2)

The data were collected at a temperature of  $-173 \pm 1^\circ\text{C}$  to a maximum  $2\theta$  value of  $54.9^\circ$ . A total of 540 oscillation images were collected. A sweep of data was done using  $\omega$  scans from  $-60.0$  to  $120.0^\circ$  in  $1.00^\circ$  step, at  $c=54.0^\circ$  and  $f = 0.0^\circ$ . The exposure rate was  $16.0 \text{ [sec./}^\circ]$ . The detector swing angle was  $29.87^\circ$ . A second sweep was performed using  $\omega$  scans from  $-60.0$  to  $120.0^\circ$  in  $1.00^\circ$  step, at  $c=54.0^\circ$  and  $f = 120.0^\circ$ . The exposure rate was  $16.0 \text{ [sec./}^\circ]$ . The detector swing angle was  $29.87^\circ$ . Another sweep was performed using  $\omega$  scans from  $-60.0$  to  $120.0^\circ$  in  $1.00^\circ$  step, at  $c=54.0^\circ$  and  $f = 240.0^\circ$ . The exposure rate was  $16.0 \text{ [sec./}^\circ]$ . The detector swing angle was  $29.87^\circ$ . The crystal-to-detector distance was 50.03 mm. Readout was performed in the 0.073 mm pixel mode.

#### Data Reduction

Of the 11623 reflections were collected, where 4988 were unique ( $R_{\text{int}} = 0.0319$ ); equivalent reflections were merged. Data were collected and processed using CrystalClear (Rigaku).<sup>1</sup>

The linear absorption coefficient,  $\mu$ , for Mo-K $\alpha$  radiation is 1.785 cm<sup>-1</sup>. An empirical absorption correction was applied which resulted in transmission factors ranging from 0.909 to 0.986. The data were corrected for Lorentz and polarization effects.

### Structure Solution and Refinement

The structure was solved by direct methods<sup>2</sup> and expanded using Fourier techniques. The non-hydrogen atoms were refined anisotropically. Hydrogen atoms were refined using the riding model. The final cycle of full-matrix least-squares refinement<sup>3</sup> on  $F^2$  was based on 4983 observed reflections and 316 variable parameters and converged (largest parameter shift was 0.01 times its esd) with unweighted and weighted agreement factors of:

$$R1 = \sum ||F_o| - |F_c|| / \sum |F_o| = 0.0525$$

$$wR2 = [ \sum ( w (F_o^2 - F_c^2)^2 ) / \sum w(F_o^2)^2 ]^{1/2} = 0.1928$$

The goodness of fit<sup>4</sup> was 1.32. Unit weights were used. The maximum and minimum peaks on the final difference Fourier map corresponded to 0.39 and -0.86 e<sup>-</sup>/Å<sup>3</sup>, respectively.

Neutral atom scattering factors were taken from International Tables for Crystallography (IT), Vol. C, Table 6.1.1.4<sup>5</sup>. Anomalous dispersion effects were included in  $F_{calc}$ <sup>6</sup>; the values for  $D_f'$  and  $D_f''$  were those of Creagh and McAuley<sup>7</sup>. The values for the mass attenuation coefficients are those of Creagh and Hubbell<sup>8</sup>. All calculations were performed using the CrystalStructure<sup>9</sup> crystallographic software package except for refinement, which was performed using SHELXL Version 2014/7<sup>10</sup>.

### References

- (1) CrystalClear: Data Collection and Processing Software, Rigaku Corporation (1998-2015). Tokyo 196-8666, Japan.
- (2) SHELXT: Sheldrick, G. M. (2014). Acta Cryst. A70, C1437.
- (3) Least Squares function minimized: (SHELXL Version 2014/7)

$$\sum w(F_o^2 - F_c^2)^2 \quad \text{where } w = \text{Least Squares weights.}$$

(4) Goodness of fit is defined as:

$$[\sum w(F_o^2 - F_c^2)^2 / (N_o - N_v)]^{1/2}$$

where:  $N_o$  = number of observations

$N_v$  = number of variables

(5) International Tables for Crystallography, Vol.C (1992). Ed. A.J.C. Wilson, Kluwer Academic Publishers, Dordrecht, Netherlands, Table 6.1.1.4, pp. 572.

(6) Ibers, J. A. & Hamilton, W. C.; Acta Crystallogr., 17, 781 (1964).

(7) Creagh, D. C. & McAuley, W.J. ; "International Tables for Crystallography", Vol C, (A.J.C. Wilson, ed.), Kluwer Academic Publishers, Boston, Table 4.2.6.8, pages 219-222 (1992).

(8) Creagh, D. C. & Hubbell, J.H.; "International Tables for Crystallography", Vol C, (A.J.C. Wilson, ed.), Kluwer Academic Publishers, Boston, Table 4.2.4.3, pages 200-206 (1992).

(9) CrystalStructure 4.3: Crystal Structure Analysis Package, Rigaku Corporation (2000-2018). Tokyo 196-8666, Japan.

(10) SHELXL Version 2014/7: Sheldrick, G. M. (2008). Acta Cryst. A64, 112-122.

*EXPERIMENTAL DETAILS*

A. Crystal Data

|                      |                                                                                                                                                  |
|----------------------|--------------------------------------------------------------------------------------------------------------------------------------------------|
| Empirical Formula    | C <sub>29</sub> H <sub>17</sub> BN <sub>2</sub> O <sub>2</sub> S                                                                                 |
| Formula Weight       | 468.34                                                                                                                                           |
| Crystal Color, Habit | green, platelet                                                                                                                                  |
| Crystal Dimensions   | 0.450 × 0.190 × 0.080 mm                                                                                                                         |
| Crystal System       | triclinic                                                                                                                                        |
| Lattice Type         | Primitive                                                                                                                                        |
| Lattice Parameters   | a = 10.254(7) Å<br>b = 10.429(6) Å<br>c = 11.673(7) Å<br>α = 65.218(16) °<br>β = 86.33(2) °<br>γ = 77.330(19) °<br>V = 1105.2(12) Å <sup>3</sup> |
| Space Group          | P-1 (#2)                                                                                                                                         |
| Z value              | 2                                                                                                                                                |
| D <sub>calc</sub>    | 1.407 g/cm <sup>3</sup>                                                                                                                          |
| F <sub>000</sub>     | 484.00                                                                                                                                           |
| μ(MoKa)              | 1.785 cm <sup>-1</sup>                                                                                                                           |



## B. Intensity Measurements

|                                                        |                                                                            |
|--------------------------------------------------------|----------------------------------------------------------------------------|
| Diffractometer                                         | XtaLAB mini                                                                |
| Radiation                                              | MoK $\alpha$ ( $\lambda = 0.71075 \text{ \AA}$ )<br>graphite monochromated |
| Voltage, Current                                       | 50kV, 12mA                                                                 |
| Temperature                                            | -173.0°C                                                                   |
| Detector Aperture                                      | 75.0 mm (diameter)                                                         |
| Data Images                                            | 540 exposures                                                              |
| $\omega$ oscillation Range ( $\chi=54.0, \phi=0.0$ )   | -60.0 - 120.0°                                                             |
| Exposure Rate                                          | 16.0 sec./°                                                                |
| Detector Swing Angle                                   | 29.87°                                                                     |
| $\omega$ oscillation Range ( $\chi=54.0, \phi=120.0$ ) | -60.0 - 120.0°                                                             |
| Exposure Rate                                          | 16.0 sec./°                                                                |
| Detector Swing Angle                                   | 29.87°                                                                     |
| $\omega$ oscillation Range ( $\chi=54.0, \phi=240.0$ ) | -60.0 - 120.0°                                                             |
| Exposure Rate                                          | 16.0 sec./°                                                                |
| Detector Swing Angle                                   | 29.87°                                                                     |
| Detector Position                                      | 50.03 mm                                                                   |
| Pixel Size                                             | 0.073 mm                                                                   |
| $2\theta_{\max}$                                       | 54.9°                                                                      |
| No. of Reflections Measured                            | Total: 11623<br>Unique: 4988 ( $R_{\text{int}} = 0.0319$ )                 |
| Corrections                                            | Lorentz-polarization<br>Absorption<br>(trans. factors: 0.909 - 0.986)      |

### C. Structure Solution and Refinement

|                                       |                                                                                                                      |
|---------------------------------------|----------------------------------------------------------------------------------------------------------------------|
| Structure Solution                    | Direct Methods (SHELXT)                                                                                              |
| Refinement                            | Full-matrix least-squares on $F^2$                                                                                   |
| Function Minimized                    | $\Sigma w (F_o^2 - F_c^2)^2$                                                                                         |
| Least Squares Weights                 | $w = 1 / [ \sigma^2(F_o^2) + (0.1000 \cdot P)^2 + 0.0000 \cdot P ]$<br>where $P = (\text{Max}(F_o^2, 0) + 2F_c^2)/3$ |
| $2\theta_{\text{max}}$ cutoff         | 54.9°                                                                                                                |
| Anomalous Dispersion                  | All non-hydrogen atoms                                                                                               |
| No. Observations (All reflections)    | 4983                                                                                                                 |
| No. Variables                         | 316                                                                                                                  |
| Reflection/Parameter Ratio            | 15.77                                                                                                                |
| Residuals: R1 ( $I > 2.00\sigma(I)$ ) | 0.0525                                                                                                               |
| Residuals: R (All reflections)        | 0.0673                                                                                                               |
| Residuals: wR2 (All reflections)      | 0.1928                                                                                                               |
| Goodness of Fit Indicator             | 1.321                                                                                                                |
| Max Shift/Error in Final Cycle        | 0.014                                                                                                                |
| Maximum peak in Final Diff. Map       | 0.39 e <sup>-</sup> /Å <sup>3</sup>                                                                                  |
| Minimum peak in Final Diff. Map       | -0.86 e <sup>-</sup> /Å <sup>3</sup>                                                                                 |

Atom numbering of **2**.

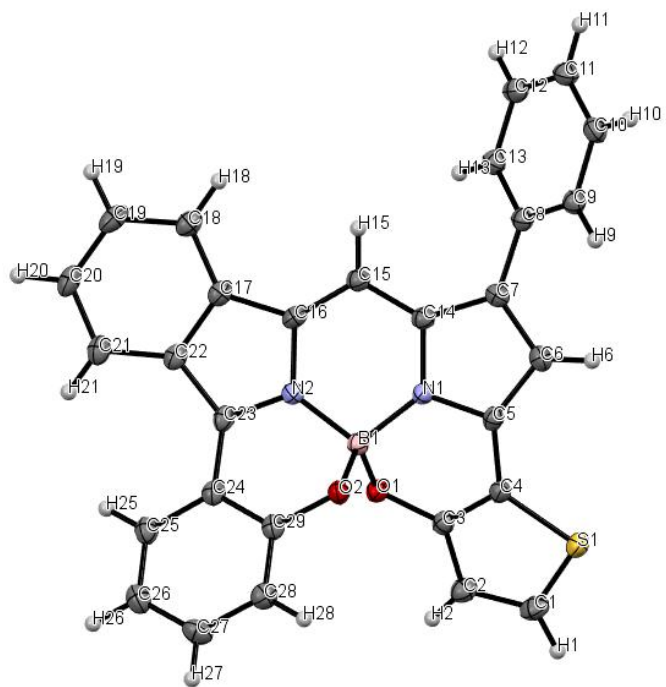

Atomic coordinates and  $B_{\text{iso}}/B_{\text{eq}}$ 

| atom | x           | y           | z           | $B_{\text{eq}}$ |
|------|-------------|-------------|-------------|-----------------|
| S1   | 0.83348(6)  | 0.94948(6)  | 0.43263(5)  | 1.941(16)       |
| O1   | 0.74590(15) | 0.57441(16) | 0.63216(14) | 1.65(3)         |
| O2   | 0.61354(15) | 0.65199(16) | 0.77550(13) | 1.56(3)         |
| N1   | 0.53260(18) | 0.73970(19) | 0.54970(17) | 1.44(3)         |
| N2   | 0.52586(18) | 0.4978(2)   | 0.70889(17) | 1.58(3)         |
| C1   | 0.9730(2)   | 0.8155(3)   | 0.5015(2)   | 2.19(4)         |
| C2   | 0.9430(2)   | 0.6837(3)   | 0.5732(2)   | 1.98(4)         |
| C3   | 0.8025(2)   | 0.6917(2)   | 0.5731(2)   | 1.52(4)         |
| C4   | 0.7288(2)   | 0.8299(2)   | 0.4999(2)   | 1.57(4)         |
| C5   | 0.5895(2)   | 0.8517(2)   | 0.47213(19) | 1.50(4)         |
| C6   | 0.4998(2)   | 0.9417(2)   | 0.3687(2)   | 1.71(4)         |
| C7   | 0.3916(2)   | 0.8757(3)   | 0.3799(2)   | 1.70(4)         |
| C8   | 0.2735(2)   | 0.9293(2)   | 0.29330(19) | 1.45(4)         |
| C9   | 0.2075(2)   | 1.0748(2)   | 0.2473(2)   | 1.71(4)         |
| C10  | 0.0919(2)   | 1.1237(2)   | 0.1708(2)   | 1.89(4)         |
| C11  | 0.0421(2)   | 1.0301(3)   | 0.1375(2)   | 1.98(4)         |
| C12  | 0.1090(2)   | 0.8863(3)   | 0.1796(2)   | 1.90(4)         |
| C13  | 0.2236(2)   | 0.8366(3)   | 0.2572(2)   | 1.76(4)         |
| C14  | 0.4157(2)   | 0.7450(2)   | 0.4930(2)   | 1.55(4)         |
| C15  | 0.3564(2)   | 0.6241(2)   | 0.5415(2)   | 1.56(4)         |
| C16  | 0.4128(2)   | 0.5012(2)   | 0.6457(2)   | 1.51(4)         |
| C17  | 0.3643(2)   | 0.3735(2)   | 0.7248(2)   | 1.53(4)         |
| C18  | 0.2557(2)   | 0.3198(2)   | 0.7097(2)   | 1.79(4)         |
| C19  | 0.2308(2)   | 0.1944(3)   | 0.8076(2)   | 2.12(4)         |
| C20  | 0.3093(2)   | 0.1257(3)   | 0.9196(2)   | 2.17(4)         |
| C21  | 0.4158(2)   | 0.1786(3)   | 0.9372(2)   | 2.03(4)         |
| C22  | 0.4449(2)   | 0.3026(2)   | 0.8380(2)   | 1.76(4)         |
| C23  | 0.5415(2)   | 0.3901(2)   | 0.8262(2)   | 1.70(4)         |
| C24  | 0.6271(2)   | 0.3981(2)   | 0.9149(2)   | 1.57(4)         |
| C25  | 0.6708(2)   | 0.2837(3)   | 1.0332(2)   | 1.96(4)         |
| C26  | 0.7412(3)   | 0.3030(3)   | 1.1196(2)   | 2.10(4)         |
| C27  | 0.7705(3)   | 0.4379(3)   | 1.0897(2)   | 2.24(4)         |
| C28  | 0.7284(2)   | 0.5537(2)   | 0.9741(2)   | 1.85(4)         |
| C29  | 0.6572(2)   | 0.5352(2)   | 0.8864(2)   | 1.65(4)         |

B1            0.6061(2)            0.6174(3)            0.6669(2)            1.37(4)

---

$$B_{eq} = 8/3 \pi^2 (U_{11}(aa^*)^2 + U_{22}(bb^*)^2 + U_{33}(cc^*)^2 + 2U_{12}(aa^*bb^*)\cos \gamma + 2U_{13}(aa^*cc^*)\cos \beta + 2U_{23}(bb^*cc^*)\cos \alpha)$$

Atomic coordinates and  $B_{iso}$  involving hydrogen atoms

---

| atom | x        | y       | z       | $B_{iso}$ |
|------|----------|---------|---------|-----------|
| H1   | 1.06155  | 0.83159 | 0.49076 | 2.624     |
| H2   | 1.00761  | 0.59790 | 0.61743 | 2.373     |
| H6   | 0.51085  | 1.03108 | 0.30330 | 2.047     |
| H9   | 0.24135  | 1.14036 | 0.26820 | 2.054     |
| H10  | 0.04677  | 1.22221 | 0.14127 | 2.268     |
| H11  | -0.03719 | 1.06411 | 0.08620 | 2.376     |
| H12  | 0.07664  | 0.82213 | 0.15566 | 2.279     |
| H13  | 0.26862  | 0.73815 | 0.28602 | 2.118     |
| H15  | 0.27679  | 0.62672 | 0.50234 | 1.874     |
| H18  | 0.20078  | 0.36760 | 0.63496 | 2.144     |
| H19  | 0.15934  | 0.15454 | 0.79833 | 2.544     |
| H20  | 0.28909  | 0.04094 | 0.98511 | 2.600     |
| H21  | 0.46742  | 0.13234 | 1.01395 | 2.438     |
| H25  | 0.65140  | 0.19167 | 1.05376 | 2.353     |
| H26  | 0.76961  | 0.22509 | 1.19891 | 2.518     |
| H27  | 0.81973  | 0.45085 | 1.14879 | 2.690     |
| H28  | 0.74825  | 0.64514 | 0.95527 | 2.219     |

---

## Anisotropic displacement parameters

| atom | U <sub>11</sub> | U <sub>22</sub> | U <sub>33</sub> | U <sub>12</sub> | U <sub>13</sub> | U <sub>23</sub> |
|------|-----------------|-----------------|-----------------|-----------------|-----------------|-----------------|
| S1   | 0.0222(3)       | 0.0277(3)       | 0.0223(3)       | -0.0111(2)      | 0.0023(2)       | -0.0064(3)      |
| O1   | 0.0171(8)       | 0.0225(8)       | 0.0208(8)       | -0.0041(6)      | 0.0014(6)       | -0.0068(6)      |
| O2   | 0.0215(8)       | 0.0189(8)       | 0.0171(8)       | -0.0048(6)      | -0.0002(6)      | -0.0054(6)      |
| N1   | 0.0158(9)       | 0.0194(9)       | 0.0191(9)       | -0.0041(7)      | 0.0003(7)       | -0.0072(7)      |
| N2   | 0.0166(9)       | 0.0234(10)      | 0.0177(9)       | -0.0030(7)      | 0.0005(7)       | -0.0068(8)      |
| C1   | 0.0190(11)      | 0.0371(14)      | 0.0299(12)      | -0.0105(10)     | 0.0043(10)      | -0.0151(11)     |
| C2   | 0.0198(12)      | 0.0285(12)      | 0.0270(12)      | -0.0051(9)      | 0.0023(9)       | -0.0119(10)     |
| C3   | 0.0212(11)      | 0.0193(10)      | 0.0175(10)      | -0.0074(9)      | 0.0028(8)       | -0.0067(9)      |
| C4   | 0.0226(11)      | 0.0201(10)      | 0.0174(10)      | -0.0107(9)      | 0.0014(8)       | -0.0053(9)      |
| C5   | 0.0211(11)      | 0.0200(10)      | 0.0171(10)      | -0.0047(9)      | 0.0025(8)       | -0.0089(9)      |
| C6   | 0.0241(12)      | 0.0198(11)      | 0.0170(10)      | -0.0022(9)      | 0.0007(9)       | -0.0052(9)      |
| C7   | 0.0171(11)      | 0.0282(12)      | 0.0159(10)      | -0.0017(9)      | -0.0010(8)      | -0.0072(9)      |
| C8   | 0.0190(11)      | 0.0199(10)      | 0.0169(10)      | -0.0052(9)      | 0.0014(8)       | -0.0079(9)      |
| C9   | 0.0220(11)      | 0.0248(11)      | 0.0173(10)      | -0.0043(9)      | 0.0004(9)       | -0.0081(9)      |
| C10  | 0.0227(12)      | 0.0219(11)      | 0.0214(11)      | -0.0016(9)      | -0.0020(9)      | -0.0046(9)      |
| C11  | 0.0176(11)      | 0.0341(13)      | 0.0202(11)      | -0.0051(10)     | -0.0016(9)      | -0.0078(10)     |
| C12  | 0.0219(12)      | 0.0328(13)      | 0.0199(11)      | -0.0091(10)     | 0.0018(9)       | -0.0119(10)     |
| C13  | 0.0180(11)      | 0.0274(12)      | 0.0174(10)      | -0.0027(9)      | 0.0018(8)       | -0.0063(9)      |
| C14  | 0.0165(10)      | 0.0233(11)      | 0.0184(10)      | -0.0039(9)      | 0.0014(8)       | -0.0084(9)      |
| C15  | 0.0181(11)      | 0.0213(11)      | 0.0201(11)      | -0.0054(9)      | 0.0012(9)       | -0.0083(9)      |
| C16  | 0.0181(11)      | 0.0199(11)      | 0.0229(11)      | -0.0068(8)      | 0.0031(8)       | -0.0113(9)      |
| C17  | 0.0199(11)      | 0.0185(10)      | 0.0225(11)      | -0.0054(9)      | 0.0042(9)       | -0.0111(9)      |
| C18  | 0.0239(12)      | 0.0193(11)      | 0.0299(12)      | -0.0051(9)      | 0.0044(9)       | -0.0154(10)     |
| C19  | 0.0219(12)      | 0.0256(12)      | 0.0399(14)      | -0.0102(10)     | 0.0090(10)      | -0.0188(11)     |
| C20  | 0.0265(12)      | 0.0228(12)      | 0.0308(13)      | -0.0079(10)     | 0.0097(10)      | -0.0090(10)     |
| C21  | 0.0239(12)      | 0.0246(12)      | 0.0253(12)      | -0.0039(10)     | 0.0051(9)       | -0.0083(10)     |
| C22  | 0.0181(11)      | 0.0255(12)      | 0.0223(11)      | -0.0049(9)      | 0.0038(9)       | -0.0094(10)     |
| C23  | 0.0171(11)      | 0.0233(11)      | 0.0206(11)      | -0.0033(9)      | 0.0039(9)       | -0.0065(9)      |
| C24  | 0.0187(11)      | 0.0172(10)      | 0.0221(11)      | -0.0012(8)      | 0.0032(9)       | -0.0081(9)      |
| C25  | 0.0213(11)      | 0.0244(12)      | 0.0221(11)      | -0.0022(9)      | 0.0018(9)       | -0.0048(10)     |
| C26  | 0.0287(13)      | 0.0222(11)      | 0.0222(11)      | -0.0008(10)     | 0.0006(10)      | -0.0051(9)      |
| C27  | 0.0272(13)      | 0.0359(14)      | 0.0214(11)      | -0.0029(10)     | -0.0029(9)      | -0.0126(10)     |
| C28  | 0.0236(12)      | 0.0217(11)      | 0.0260(12)      | -0.0024(9)      | 0.0022(9)       | -0.0123(10)     |
| C29  | 0.0176(10)      | 0.0234(11)      | 0.0175(10)      | -0.0005(9)      | 0.0032(8)       | -0.0065(9)      |
| B1   | 0.0184(12)      | 0.0155(11)      | 0.0198(12)      | -0.0040(9)      | 0.0006(9)       | -0.0085(9)      |

The general temperature factor expression:

$$\exp(-2\pi^2(a^2U_{11}h^2 + b^2U_{22}k^2 + c^2U_{33}l^2 + 2a*b*U_{12}hk + 2a*c*U_{13}hl + 2b*c*U_{23}kl))$$

Bond lengths (Å)

| atom | atom | distance | atom | atom | distance |
|------|------|----------|------|------|----------|
| S1   | C1   | 1.724(2) | S1   | C4   | 1.727(3) |
| O1   | C3   | 1.364(3) | O1   | B1   | 1.488(3) |
| O2   | C29  | 1.368(2) | O2   | B1   | 1.466(4) |
| N1   | C5   | 1.367(3) | N1   | C14  | 1.385(3) |
| N1   | B1   | 1.522(3) | N2   | C16  | 1.400(3) |
| N2   | C23  | 1.350(3) | N2   | B1   | 1.536(3) |
| C1   | C2   | 1.369(4) | C2   | C3   | 1.425(3) |
| C3   | C4   | 1.396(3) | C4   | C5   | 1.433(3) |
| C5   | C6   | 1.414(3) | C6   | C7   | 1.401(4) |
| C7   | C8   | 1.479(3) | C7   | C14  | 1.431(3) |
| C8   | C9   | 1.401(3) | C8   | C13  | 1.400(4) |
| C9   | C10  | 1.397(3) | C10  | C11  | 1.388(4) |
| C11  | C12  | 1.391(3) | C12  | C13  | 1.395(3) |
| C14  | C15  | 1.405(4) | C15  | C16  | 1.384(3) |
| C16  | C17  | 1.440(3) | C17  | C18  | 1.402(4) |
| C17  | C22  | 1.424(3) | C18  | C19  | 1.392(3) |
| C19  | C20  | 1.403(4) | C20  | C21  | 1.388(4) |
| C21  | C22  | 1.404(3) | C22  | C23  | 1.452(4) |
| C23  | C24  | 1.439(4) | C24  | C25  | 1.413(3) |
| C24  | C29  | 1.425(4) | C25  | C26  | 1.381(4) |
| C26  | C27  | 1.396(4) | C27  | C28  | 1.394(3) |
| C28  | C29  | 1.394(4) |      |      |          |

## Bond lengths involving hydrogens (Å)

| atom | atom | distance | atom | atom | distance |
|------|------|----------|------|------|----------|
| C1   | H1   | 0.950    | C2   | H2   | 0.950    |
| C6   | H6   | 0.950    | C9   | H9   | 0.950    |
| C10  | H10  | 0.950    | C11  | H11  | 0.950    |
| C12  | H12  | 0.950    | C13  | H13  | 0.950    |
| C15  | H15  | 0.950    | C18  | H18  | 0.950    |
| C19  | H19  | 0.950    | C20  | H20  | 0.950    |
| C21  | H21  | 0.950    | C25  | H25  | 0.950    |
| C26  | H26  | 0.950    | C27  | H27  | 0.950    |
| C28  | H28  | 0.950    |      |      |          |



## Bond angles (°)

| atom | atom | atom | angle      | atom | atom | atom | angle      |
|------|------|------|------------|------|------|------|------------|
| C1   | S1   | C4   | 91.69(12)  | C3   | O1   | B1   | 111.17(17) |
| C29  | O2   | B1   | 114.77(19) | C5   | N1   | C14  | 109.61(17) |
| C5   | N1   | B1   | 121.8(2)   | C14  | N1   | B1   | 127.61(19) |
| C16  | N2   | C23  | 111.4(2)   | C16  | N2   | B1   | 125.71(16) |
| C23  | N2   | B1   | 121.5(2)   | S1   | C1   | C2   | 113.03(19) |
| C1   | C2   | C3   | 111.33(19) | O1   | C3   | C2   | 123.40(17) |
| O1   | C3   | C4   | 123.2(2)   | C2   | C3   | C4   | 113.3(2)   |
| S1   | C4   | C3   | 110.62(18) | S1   | C4   | C5   | 128.12(14) |
| C3   | C4   | C5   | 120.3(2)   | N1   | C5   | C4   | 113.65(16) |
| N1   | C5   | C6   | 108.1(2)   | C4   | C5   | C6   | 136.34(19) |
| C5   | C6   | C7   | 107.75(18) | C6   | C7   | C8   | 127.34(18) |
| C6   | C7   | C14  | 106.9(2)   | C8   | C7   | C14  | 125.7(2)   |
| C7   | C8   | C9   | 120.2(3)   | C7   | C8   | C13  | 121.3(2)   |
| C9   | C8   | C13  | 118.5(2)   | C8   | C9   | C10  | 120.2(3)   |
| C9   | C10  | C11  | 120.8(2)   | C10  | C11  | C12  | 119.6(2)   |
| C11  | C12  | C13  | 119.8(3)   | C8   | C13  | C12  | 121.1(2)   |
| N1   | C14  | C7   | 107.2(2)   | N1   | C14  | C15  | 119.38(17) |
| C7   | C14  | C15  | 132.7(2)   | C14  | C15  | C16  | 120.6(2)   |
| N2   | C16  | C15  | 120.6(2)   | N2   | C16  | C17  | 106.23(17) |
| C15  | C16  | C17  | 132.0(2)   | C16  | C17  | C18  | 131.77(19) |
| C16  | C17  | C22  | 107.5(2)   | C18  | C17  | C22  | 120.64(19) |
| C17  | C18  | C19  | 118.0(2)   | C18  | C19  | C20  | 121.2(3)   |
| C19  | C20  | C21  | 121.6(2)   | C20  | C21  | C22  | 118.0(2)   |
| C17  | C22  | C21  | 120.5(2)   | C17  | C22  | C23  | 106.62(18) |
| C21  | C22  | C23  | 132.7(2)   | N2   | C23  | C22  | 107.6(2)   |
| N2   | C23  | C24  | 117.6(2)   | C22  | C23  | C24  | 133.83(19) |
| C23  | C24  | C25  | 124.1(2)   | C23  | C24  | C29  | 117.19(17) |
| C25  | C24  | C29  | 118.3(2)   | C24  | C25  | C26  | 121.2(2)   |
| C25  | C26  | C27  | 119.6(2)   | C26  | C27  | C28  | 120.9(3)   |
| C27  | C28  | C29  | 119.9(2)   | O2   | C29  | C24  | 121.4(2)   |
| O2   | C29  | C28  | 118.6(2)   | C24  | C29  | C28  | 120.02(18) |
| O1   | B1   | O2   | 107.2(2)   | O1   | B1   | N1   | 107.69(17) |
| O1   | B1   | N2   | 114.4(2)   | O2   | B1   | N1   | 115.7(2)   |

O2      B1      N2      106.25(17)      N1      B1      N2      105.9(2)

---

## Bond angles involving hydrogens (°)

| atom | atom | atom | angle | atom | atom | atom | angle |
|------|------|------|-------|------|------|------|-------|
| S1   | C1   | H1   | 123.5 | C2   | C1   | H1   | 123.5 |
| C1   | C2   | H2   | 124.3 | C3   | C2   | H2   | 124.3 |
| C5   | C6   | H6   | 126.1 | C7   | C6   | H6   | 126.1 |
| C8   | C9   | H9   | 119.9 | C10  | C9   | H9   | 119.9 |
| C9   | C10  | H10  | 119.6 | C11  | C10  | H10  | 119.6 |
| C10  | C11  | H11  | 120.2 | C12  | C11  | H11  | 120.2 |
| C11  | C12  | H12  | 120.1 | C13  | C12  | H12  | 120.1 |
| C8   | C13  | H13  | 119.5 | C12  | C13  | H13  | 119.4 |
| C14  | C15  | H15  | 119.7 | C16  | C15  | H15  | 119.7 |
| C17  | C18  | H18  | 121.0 | C19  | C18  | H18  | 121.0 |
| C18  | C19  | H19  | 119.4 | C20  | C19  | H19  | 119.4 |
| C19  | C20  | H20  | 119.2 | C21  | C20  | H20  | 119.2 |
| C20  | C21  | H21  | 121.0 | C22  | C21  | H21  | 121.0 |
| C24  | C25  | H25  | 119.4 | C26  | C25  | H25  | 119.4 |
| C25  | C26  | H26  | 120.2 | C27  | C26  | H26  | 120.2 |
| C26  | C27  | H27  | 119.6 | C28  | C27  | H27  | 119.6 |
| C27  | C28  | H28  | 120.0 | C29  | C28  | H28  | 120.0 |

Torsion Angles(<sup>o</sup>) (Those having bond angles > 160 or < 20 degrees are excluded.)

| atom1 | atom2 | atom3 | atom4 | angle       | atom1 | atom2 | atom3 | atom4 | angle       |
|-------|-------|-------|-------|-------------|-------|-------|-------|-------|-------------|
| C1    | S1    | C4    | C3    | 0.19(19)    | C1    | S1    | C4    | C5    | -168.6(2)   |
| C4    | S1    | C1    | C2    | 0.1(2)      | C3    | O1    | B1    | O2    | -74.33(19)  |
| C3    | O1    | B1    | N1    | 50.8(3)     | C3    | O1    | B1    | N2    | 168.12(17)  |
| B1    | O1    | C3    | C2    | 154.4(2)    | B1    | O1    | C3    | C4    | -29.8(3)    |
| C29   | O2    | B1    | O1    | -71.5(2)    | C29   | O2    | B1    | N1    | 168.33(17)  |
| C29   | O2    | B1    | N2    | 51.2(2)     | B1    | O2    | C29   | C24   | -33.3(3)    |
| B1    | O2    | C29   | C28   | 148.96(18)  | C5    | N1    | C14   | C7    | -6.1(3)     |
| C5    | N1    | C14   | C15   | 165.8(2)    | C14   | N1    | C5    | C4    | -160.02(19) |
| C14   | N1    | C5    | C6    | 6.8(3)      | C5    | N1    | B1    | O1    | -43.8(3)    |
| C5    | N1    | B1    | O2    | 76.1(3)     | C5    | N1    | B1    | N2    | -166.5(2)   |
| B1    | N1    | C5    | C4    | 9.7(3)      | B1    | N1    | C5    | C6    | 176.5(2)    |
| C14   | N1    | B1    | O1    | 124.0(2)    | C14   | N1    | B1    | O2    | -116.1(3)   |
| C14   | N1    | B1    | N2    | 1.2(3)      | B1    | N1    | C14   | C7    | -175.1(2)   |
| B1    | N1    | C14   | C15   | -3.2(4)     | C16   | N2    | C23   | C22   | 8.1(3)      |
| C16   | N2    | C23   | C24   | -162.06(19) | C23   | N2    | C16   | C15   | 161.3(2)    |
| C23   | N2    | C16   | C17   | -7.8(3)     | C16   | N2    | B1    | O1    | -115.2(2)   |
| C16   | N2    | B1    | O2    | 126.7(2)    | C16   | N2    | B1    | N1    | 3.2(3)      |
| B1    | N2    | C16   | C15   | -5.7(3)     | B1    | N2    | C16   | C17   | -174.85(19) |
| C23   | N2    | B1    | O1    | 79.0(3)     | C23   | N2    | B1    | O2    | -39.1(3)    |
| C23   | N2    | B1    | N1    | -162.64(19) | B1    | N2    | C23   | C22   | 175.82(17)  |
| B1    | N2    | C23   | C24   | 5.6(3)      | S1    | C1    | C2    | C3    | -0.4(3)     |
| C1    | C2    | C3    | O1    | 176.8(2)    | C1    | C2    | C3    | C4    | 0.6(3)      |
| O1    | C3    | C4    | S1    | -176.7(2)   | O1    | C3    | C4    | C5    | -6.8(4)     |
| C2    | C3    | C4    | S1    | -0.5(3)     | C2    | C3    | C4    | C5    | 169.4(2)    |
| S1    | C4    | C5    | N1    | -174.79(18) | S1    | C4    | C5    | C6    | 23.6(5)     |
| C3    | C4    | C5    | N1    | 17.3(3)     | C3    | C4    | C5    | C6    | -144.3(3)   |
| N1    | C5    | C6    | C7    | -4.7(3)     | C4    | C5    | C6    | C7    | 157.6(3)    |
| C5    | C6    | C7    | C8    | -179.6(2)   | C5    | C6    | C7    | C14   | 0.9(3)      |
| C6    | C7    | C8    | C9    | -44.6(4)    | C6    | C7    | C8    | C13   | 136.6(3)    |
| C6    | C7    | C14   | N1    | 3.1(3)      | C6    | C7    | C14   | C15   | -167.3(2)   |
| C8    | C7    | C14   | N1    | -176.4(2)   | C8    | C7    | C14   | C15   | 13.2(4)     |
| C14   | C7    | C8    | C9    | 134.7(2)    | C14   | C7    | C8    | C13   | -44.1(3)    |
| C7    | C8    | C9    | C10   | -176.67(17) | C7    | C8    | C13   | C12   | 177.36(17)  |
| C9    | C8    | C13   | C12   | -1.5(3)     | C13   | C8    | C9    | C10   | 2.2(3)      |
| C8    | C9    | C10   | C11   | -1.1(3)     | C9    | C10   | C11   | C12   | -0.7(3)     |

|     |     |     |     |             |     |     |     |     |             |
|-----|-----|-----|-----|-------------|-----|-----|-----|-----|-------------|
| C10 | C11 | C12 | C13 | 1.4(3)      | C11 | C12 | C13 | C8  | -0.3(3)     |
| N1  | C14 | C15 | C16 | 0.7(4)      | C7  | C14 | C15 | C16 | 170.2(2)    |
| C14 | C15 | C16 | N2  | 3.5(4)      | C14 | C15 | C16 | C17 | 169.4(2)    |
| N2  | C16 | C17 | C18 | -179.5(2)   | N2  | C16 | C17 | C22 | 4.2(2)      |
| C15 | C16 | C17 | C18 | 13.2(5)     | C15 | C16 | C17 | C22 | -163.2(3)   |
| C16 | C17 | C18 | C19 | -177.0(2)   | C16 | C17 | C22 | C21 | 176.0(2)    |
| C16 | C17 | C22 | C23 | 0.5(3)      | C18 | C17 | C22 | C21 | -0.8(4)     |
| C18 | C17 | C22 | C23 | -176.4(2)   | C22 | C17 | C18 | C19 | -1.1(4)     |
| C17 | C18 | C19 | C20 | 1.8(4)      | C18 | C19 | C20 | C21 | -0.8(4)     |
| C19 | C20 | C21 | C22 | -1.1(4)     | C20 | C21 | C22 | C17 | 1.8(4)      |
| C20 | C21 | C22 | C23 | 176.1(2)    | C17 | C22 | C23 | N2  | -5.2(3)     |
| C17 | C22 | C23 | C24 | 162.7(2)    | C21 | C22 | C23 | N2  | -180.0(3)   |
| C21 | C22 | C23 | C24 | -12.1(5)    | N2  | C23 | C24 | C25 | -169.15(19) |
| N2  | C23 | C24 | C29 | 17.8(3)     | C22 | C23 | C24 | C25 | 23.9(4)     |
| C22 | C23 | C24 | C29 | -149.2(2)   | C23 | C24 | C25 | C26 | -173.1(2)   |
| C23 | C24 | C29 | O2  | -4.0(3)     | C23 | C24 | C29 | C28 | 173.62(18)  |
| C25 | C24 | C29 | O2  | -177.51(19) | C25 | C24 | C29 | C28 | 0.2(3)      |
| C29 | C24 | C25 | C26 | -0.1(3)     | C24 | C25 | C26 | C27 | -0.3(3)     |
| C25 | C26 | C27 | C28 | 0.6(4)      | C26 | C27 | C28 | C29 | -0.6(4)     |
| C27 | C28 | C29 | O2  | 177.9(2)    | C27 | C28 | C29 | C24 | 0.2(3)      |

---

Intramolecular contacts less than 3.60 Å

| atom | atom | distance | atom | atom | distance |
|------|------|----------|------|------|----------|
| S1   | C6   | 3.574(3) | O1   | C5   | 2.871(3) |
| O1   | C14  | 3.592(3) | O1   | C23  | 3.275(3) |
| O1   | C24  | 3.337(3) | O1   | C29  | 2.932(3) |
| O2   | C3   | 2.907(3) | O2   | C4   | 3.265(3) |
| O2   | C5   | 3.262(3) | O2   | C16  | 3.581(4) |
| O2   | C23  | 2.798(4) | N1   | C3   | 2.712(3) |
| N1   | C16  | 2.789(3) | N2   | C14  | 2.813(3) |
| N2   | C29  | 2.742(4) | C4   | C14  | 3.527(4) |
| C4   | B1   | 2.754(3) | C5   | C15  | 3.555(4) |
| C6   | C9   | 3.161(4) | C8   | C11  | 2.811(4) |
| C8   | C15  | 3.263(3) | C9   | C12  | 2.790(4) |
| C10  | C13  | 2.771(4) | C13  | C14  | 3.167(4) |
| C13  | C15  | 3.296(3) | C15  | C18  | 3.308(4) |
| C15  | C23  | 3.547(3) | C15  | B1   | 3.004(4) |
| C16  | C24  | 3.588(4) | C17  | C20  | 2.778(3) |
| C18  | C21  | 2.852(4) | C19  | C22  | 2.782(4) |
| C21  | C24  | 3.407(4) | C21  | C25  | 3.458(4) |
| C22  | C25  | 3.271(4) | C24  | C27  | 2.803(4) |
| C24  | B1   | 2.823(3) | C25  | C28  | 2.794(4) |
| C26  | C29  | 2.806(3) |      |      |          |

Intramolecular contacts less than 3.60 Å involving hydrogens

| atom | atom | distance | atom | atom | distance |
|------|------|----------|------|------|----------|
| S1   | H2   | 3.504    | S1   | H6   | 3.504    |
| O1   | H2   | 2.736    | O2   | H28  | 2.553    |
| N1   | H6   | 3.165    | N1   | H15  | 3.265    |
| N2   | H15  | 3.272    | C3   | H1   | 3.211    |
| C4   | H1   | 3.410    | C4   | H2   | 3.255    |
| C4   | H6   | 3.038    | C6   | H9   | 2.940    |
| C7   | H9   | 2.659    | C7   | H13  | 2.671    |
| C7   | H15  | 2.861    | C8   | H6   | 2.887    |
| C8   | H10  | 3.279    | C8   | H12  | 3.289    |
| C8   | H15  | 3.070    | C9   | H6   | 3.115    |
| C9   | H11  | 3.278    | C9   | H13  | 3.266    |
| C10  | H12  | 3.261    | C11  | H9   | 3.275    |
| C11  | H13  | 3.265    | C12  | H10  | 3.259    |
| C13  | H9   | 3.268    | C13  | H11  | 3.271    |
| C13  | H15  | 2.775    | C14  | H6   | 3.197    |
| C14  | H13  | 2.962    | C15  | H13  | 2.831    |
| C15  | H18  | 3.177    | C16  | H18  | 2.862    |
| C17  | H15  | 2.834    | C17  | H19  | 3.256    |
| C17  | H21  | 3.319    | C18  | H15  | 3.145    |
| C18  | H20  | 3.283    | C19  | H21  | 3.296    |
| C20  | H18  | 3.295    | C21  | H19  | 3.283    |
| C21  | H25  | 2.903    | C22  | H18  | 3.318    |
| C22  | H20  | 3.253    | C22  | H25  | 3.055    |
| C23  | H21  | 2.890    | C23  | H25  | 2.713    |
| C24  | H21  | 3.281    | C24  | H26  | 3.291    |
| C24  | H28  | 3.301    | C25  | H21  | 2.948    |
| C25  | H27  | 3.255    | C26  | H28  | 3.282    |
| C27  | H25  | 3.256    | C28  | H26  | 3.283    |
| C29  | H25  | 3.296    | C29  | H27  | 3.269    |
| H1   | H2   | 2.428    | H6   | H9   | 2.734    |
| H9   | H10  | 2.340    | H10  | H11  | 2.336    |
| H11  | H12  | 2.346    | H12  | H13  | 2.338    |
| H13  | H15  | 2.293    | H15  | H18  | 2.751    |
| H18  | H19  | 2.348    | H19  | H20  | 2.333    |
| H20  | H21  | 2.341    | H21  | H25  | 2.241    |

|     |     |       |     |     |       |
|-----|-----|-------|-----|-----|-------|
| H25 | H26 | 2.325 | H26 | H27 | 2.343 |
| H27 | H28 | 2.339 |     |     |       |

---

Intermolecular contacts less than 3.60 Å

| atom | atom             | distance | atom | atom             | distance |
|------|------------------|----------|------|------------------|----------|
| C3   | C18 <sup>1</sup> | 3.447(4) | C4   | C18 <sup>1</sup> | 3.390(4) |
| C5   | C5 <sup>2</sup>  | 3.522(4) | C5   | C6 <sup>2</sup>  | 3.348(4) |
| C5   | C18 <sup>1</sup> | 3.425(4) | C6   | C5 <sup>2</sup>  | 3.348(4) |
| C10  | C20 <sup>3</sup> | 3.564(4) | C13  | C23 <sup>1</sup> | 3.387(4) |
| C15  | C16 <sup>1</sup> | 3.529(4) | C16  | C15 <sup>1</sup> | 3.529(4) |
| C17  | C27 <sup>4</sup> | 3.531(4) | C18  | C3 <sup>1</sup>  | 3.447(4) |
| C18  | C4 <sup>1</sup>  | 3.390(4) | C18  | C5 <sup>1</sup>  | 3.425(4) |
| C20  | C10 <sup>5</sup> | 3.564(4) | C21  | C21 <sup>6</sup> | 3.455(4) |
| C21  | C28 <sup>4</sup> | 3.386(4) | C22  | C27 <sup>4</sup> | 3.460(4) |
| C22  | C28 <sup>4</sup> | 3.361(4) | C23  | C13 <sup>1</sup> | 3.387(4) |
| C27  | C17 <sup>4</sup> | 3.531(4) | C27  | C22 <sup>4</sup> | 3.460(4) |
| C28  | C21 <sup>4</sup> | 3.386(4) | C28  | C22 <sup>4</sup> | 3.361(4) |

---

Symmetry Operators:

- |                    |                    |
|--------------------|--------------------|
| (1) -X+1,-Y+1,-Z+1 | (2) -X+1,-Y+2,-Z+1 |
| (3) X,Y+1,Z-1      | (4) -X+1,-Y+1,-Z+2 |
| (5) X,Y-1,Z+1      | (6) -X+1,-Y,-Z+2   |



Intermolecular contacts less than 3.60 Å involving hydrogens

| atom | atom              | distance | atom | atom              | distance |
|------|-------------------|----------|------|-------------------|----------|
| S1   | H1 <sup>1</sup>   | 3.176    | S1   | H9 <sup>2</sup>   | 3.300    |
| S1   | H19 <sup>3</sup>  | 3.293    | S1   | H26 <sup>4</sup>  | 2.994    |
| O1   | H13 <sup>3</sup>  | 3.024    | O1   | H15 <sup>3</sup>  | 3.153    |
| O1   | H18 <sup>3</sup>  | 2.955    | O2   | H6 <sup>2</sup>   | 3.025    |
| O2   | H9 <sup>2</sup>   | 2.748    | N1   | H6 <sup>2</sup>   | 3.425    |
| N2   | H13 <sup>3</sup>  | 2.849    | N2   | H15 <sup>3</sup>  | 3.571    |
| C1   | H9 <sup>2</sup>   | 3.479    | C1   | H15 <sup>5</sup>  | 3.298    |
| C2   | H9 <sup>2</sup>   | 3.353    | C2   | H15 <sup>5</sup>  | 3.451    |
| C2   | H18 <sup>5</sup>  | 3.578    | C2   | H18 <sup>3</sup>  | 3.203    |
| C3   | H9 <sup>2</sup>   | 2.995    | C3   | H18 <sup>3</sup>  | 2.750    |
| C4   | H9 <sup>2</sup>   | 2.893    | C4   | H18 <sup>3</sup>  | 3.027    |
| C4   | H19 <sup>3</sup>  | 3.543    | C5   | H6 <sup>2</sup>   | 3.349    |
| C5   | H18 <sup>3</sup>  | 3.363    | C8   | H1 <sup>6</sup>   | 3.072    |
| C8   | H20 <sup>4</sup>  | 3.289    | C9   | H1 <sup>6</sup>   | 3.439    |
| C9   | H20 <sup>4</sup>  | 3.262    | C9   | H28 <sup>2</sup>  | 2.997    |
| C10  | H20 <sup>4</sup>  | 3.127    | C10  | H26 <sup>7</sup>  | 3.281    |
| C10  | H28 <sup>2</sup>  | 3.019    | C11  | H11 <sup>8</sup>  | 3.159    |
| C11  | H12 <sup>8</sup>  | 3.295    | C11  | H19 <sup>9</sup>  | 2.979    |
| C11  | H20 <sup>4</sup>  | 2.995    | C11  | H26 <sup>7</sup>  | 3.306    |
| C12  | H1 <sup>6</sup>   | 3.451    | C12  | H11 <sup>8</sup>  | 3.036    |
| C12  | H19 <sup>9</sup>  | 2.855    | C12  | H20 <sup>4</sup>  | 2.978    |
| C13  | H1 <sup>6</sup>   | 3.088    | C13  | H20 <sup>4</sup>  | 3.124    |
| C14  | H1 <sup>6</sup>   | 3.544    | C15  | H1 <sup>6</sup>   | 3.234    |
| C16  | H13 <sup>3</sup>  | 3.553    | C16  | H27 <sup>10</sup> | 3.383    |
| C17  | H27 <sup>10</sup> | 3.080    | C18  | H2 <sup>6</sup>   | 3.246    |
| C18  | H27 <sup>10</sup> | 3.374    | C19  | H11 <sup>9</sup>  | 3.461    |
| C19  | H12 <sup>9</sup>  | 3.187    | C19  | H25 <sup>11</sup> | 3.597    |
| C20  | H21 <sup>11</sup> | 2.977    | C20  | H25 <sup>11</sup> | 3.128    |
| C20  | H28 <sup>10</sup> | 3.223    | C21  | H20 <sup>11</sup> | 3.285    |
| C21  | H21 <sup>11</sup> | 3.018    | C21  | H28 <sup>10</sup> | 2.845    |
| C22  | H13 <sup>3</sup>  | 3.214    | C22  | H27 <sup>10</sup> | 3.349    |
| C22  | H28 <sup>10</sup> | 3.172    | C23  | H13 <sup>3</sup>  | 2.701    |
| C24  | H13 <sup>3</sup>  | 3.236    | C25  | H11 <sup>12</sup> | 3.261    |
| C25  | H12 <sup>3</sup>  | 3.583    | C25  | H20 <sup>11</sup> | 3.415    |
| C26  | H10 <sup>12</sup> | 3.058    | C26  | H11 <sup>12</sup> | 3.121    |

|     |                   |       |     |                   |       |
|-----|-------------------|-------|-----|-------------------|-------|
| C27 | H10 <sup>12</sup> | 3.120 | C28 | H9 <sup>2</sup>   | 3.322 |
| C28 | H10 <sup>2</sup>  | 3.452 | C28 | H21 <sup>10</sup> | 3.498 |
| C29 | H9 <sup>2</sup>   | 3.460 | B1  | H9 <sup>2</sup>   | 3.590 |
| B1  | H13 <sup>3</sup>  | 3.463 | H1  | S1 <sup>1</sup>   | 3.176 |
| H1  | C8 <sup>5</sup>   | 3.072 | H1  | C9 <sup>5</sup>   | 3.439 |
| H1  | C12 <sup>5</sup>  | 3.451 | H1  | C13 <sup>5</sup>  | 3.088 |
| H1  | C14 <sup>5</sup>  | 3.544 | H1  | C15 <sup>5</sup>  | 3.234 |
| H1  | H1 <sup>1</sup>   | 3.554 | H1  | H13 <sup>5</sup>  | 3.401 |
| H1  | H15 <sup>5</sup>  | 2.680 | H2  | C18 <sup>5</sup>  | 3.246 |
| H2  | H15 <sup>5</sup>  | 3.011 | H2  | H18 <sup>5</sup>  | 2.699 |
| H2  | H18 <sup>3</sup>  | 3.599 | H2  | H27 <sup>13</sup> | 3.147 |
| H6  | O2 <sup>2</sup>   | 3.025 | H6  | N1 <sup>2</sup>   | 3.425 |
| H6  | C5 <sup>2</sup>   | 3.349 | H6  | H21 <sup>4</sup>  | 3.117 |
| H6  | H25 <sup>4</sup>  | 3.130 | H6  | H26 <sup>4</sup>  | 3.535 |
| H9  | S1 <sup>2</sup>   | 3.300 | H9  | O2 <sup>2</sup>   | 2.748 |
| H9  | C1 <sup>2</sup>   | 3.479 | H9  | C2 <sup>2</sup>   | 3.353 |
| H9  | C3 <sup>2</sup>   | 2.995 | H9  | C4 <sup>2</sup>   | 2.893 |
| H9  | C28 <sup>2</sup>  | 3.322 | H9  | C29 <sup>2</sup>  | 3.460 |
| H9  | B1 <sup>2</sup>   | 3.590 | H9  | H28 <sup>2</sup>  | 2.645 |
| H10 | C26 <sup>7</sup>  | 3.058 | H10 | C27 <sup>7</sup>  | 3.120 |
| H10 | C28 <sup>2</sup>  | 3.452 | H10 | H26 <sup>7</sup>  | 2.875 |
| H10 | H27 <sup>7</sup>  | 2.971 | H10 | H28 <sup>2</sup>  | 2.696 |
| H11 | C11 <sup>8</sup>  | 3.159 | H11 | C12 <sup>8</sup>  | 3.036 |
| H11 | C19 <sup>9</sup>  | 3.461 | H11 | C25 <sup>7</sup>  | 3.261 |
| H11 | C26 <sup>7</sup>  | 3.121 | H11 | H11 <sup>8</sup>  | 2.834 |
| H11 | H12 <sup>8</sup>  | 2.583 | H11 | H19 <sup>9</sup>  | 2.654 |
| H11 | H20 <sup>4</sup>  | 3.467 | H11 | H20 <sup>9</sup>  | 3.293 |
| H11 | H25 <sup>7</sup>  | 3.159 | H11 | H26 <sup>7</sup>  | 2.921 |
| H12 | C11 <sup>8</sup>  | 3.295 | H12 | C19 <sup>9</sup>  | 3.187 |
| H12 | C25 <sup>3</sup>  | 3.583 | H12 | H11 <sup>8</sup>  | 2.583 |
| H12 | H19 <sup>9</sup>  | 2.426 | H12 | H20 <sup>4</sup>  | 3.425 |
| H13 | O1 <sup>3</sup>   | 3.024 | H13 | N2 <sup>3</sup>   | 2.849 |
| H13 | C16 <sup>3</sup>  | 3.553 | H13 | C22 <sup>3</sup>  | 3.214 |
| H13 | C23 <sup>3</sup>  | 2.701 | H13 | C24 <sup>3</sup>  | 3.236 |
| H13 | B1 <sup>3</sup>   | 3.463 | H13 | H1 <sup>6</sup>   | 3.401 |
| H15 | O1 <sup>3</sup>   | 3.153 | H15 | N2 <sup>3</sup>   | 3.571 |
| H15 | C1 <sup>6</sup>   | 3.298 | H15 | C2 <sup>6</sup>   | 3.451 |

|     |                 |       |     |                 |       |
|-----|-----------------|-------|-----|-----------------|-------|
| H15 | H1 <sup>6</sup> | 2.680 | H15 | H2 <sup>6</sup> | 3.011 |
| H18 | O1 <sup>3</sup> | 2.955 | H18 | C2 <sup>6</sup> | 3.578 |

---

Intermolecular contacts less than 3.60 Å involving hydrogens (continued)

| atom | atom              | distance | atom | atom              | distance |
|------|-------------------|----------|------|-------------------|----------|
| H18  | C2 <sup>3</sup>   | 3.203    | H18  | C3 <sup>3</sup>   | 2.750    |
| H18  | C4 <sup>3</sup>   | 3.027    | H18  | C5 <sup>3</sup>   | 3.363    |
| H18  | H2 <sup>6</sup>   | 2.699    | H18  | H2 <sup>3</sup>   | 3.599    |
| H19  | S1 <sup>3</sup>   | 3.293    | H19  | C4 <sup>3</sup>   | 3.543    |
| H19  | C11 <sup>9</sup>  | 2.979    | H19  | C12 <sup>9</sup>  | 2.855    |
| H19  | H11 <sup>9</sup>  | 2.654    | H19  | H12 <sup>9</sup>  | 2.426    |
| H19  | H25 <sup>11</sup> | 3.451    | H20  | C8 <sup>14</sup>  | 3.289    |
| H20  | C9 <sup>14</sup>  | 3.262    | H20  | C10 <sup>14</sup> | 3.127    |
| H20  | C11 <sup>14</sup> | 2.995    | H20  | C12 <sup>14</sup> | 2.978    |
| H20  | C13 <sup>14</sup> | 3.124    | H20  | C21 <sup>11</sup> | 3.285    |
| H20  | C25 <sup>11</sup> | 3.415    | H20  | H11 <sup>14</sup> | 3.467    |
| H20  | H11 <sup>9</sup>  | 3.293    | H20  | H12 <sup>14</sup> | 3.425    |
| H20  | H21 <sup>11</sup> | 2.740    | H20  | H25 <sup>11</sup> | 2.589    |
| H20  | H28 <sup>10</sup> | 3.560    | H21  | C20 <sup>11</sup> | 2.977    |
| H21  | C21 <sup>11</sup> | 3.018    | H21  | C28 <sup>10</sup> | 3.498    |
| H21  | H6 <sup>14</sup>  | 3.117    | H21  | H20 <sup>11</sup> | 2.740    |
| H21  | H21 <sup>11</sup> | 2.844    | H21  | H28 <sup>10</sup> | 2.958    |
| H25  | C19 <sup>11</sup> | 3.597    | H25  | C20 <sup>11</sup> | 3.128    |
| H25  | H6 <sup>14</sup>  | 3.130    | H25  | H11 <sup>12</sup> | 3.159    |
| H25  | H19 <sup>11</sup> | 3.451    | H25  | H20 <sup>11</sup> | 2.589    |
| H26  | S1 <sup>14</sup>  | 2.994    | H26  | C10 <sup>12</sup> | 3.281    |
| H26  | C11 <sup>12</sup> | 3.306    | H26  | H6 <sup>14</sup>  | 3.535    |
| H26  | H10 <sup>12</sup> | 2.875    | H26  | H11 <sup>12</sup> | 2.921    |
| H27  | C16 <sup>10</sup> | 3.383    | H27  | C17 <sup>10</sup> | 3.080    |
| H27  | C18 <sup>10</sup> | 3.374    | H27  | C22 <sup>10</sup> | 3.349    |
| H27  | H2 <sup>13</sup>  | 3.147    | H27  | H10 <sup>12</sup> | 2.971    |
| H28  | C9 <sup>2</sup>   | 2.997    | H28  | C10 <sup>2</sup>  | 3.019    |
| H28  | C20 <sup>10</sup> | 3.223    | H28  | C21 <sup>10</sup> | 2.845    |
| H28  | C22 <sup>10</sup> | 3.172    | H28  | H9 <sup>2</sup>   | 2.645    |
| H28  | H10 <sup>2</sup>  | 2.696    | H28  | H20 <sup>10</sup> | 3.560    |

## Symmetry Operators:

- |                       |                       |
|-----------------------|-----------------------|
| (1) $-X+2,-Y+2,-Z+1$  | (2) $-X+1,-Y+2,-Z+1$  |
| (3) $-X+1,-Y+1,-Z+1$  | (4) $X,Y+1,Z-1$       |
| (5) $X+1,Y,Z$         | (6) $X-1,Y,Z$         |
| (7) $X-1,Y+1,Z-1$     | (8) $-X,-Y+2,-Z$      |
| (9) $-X,-Y+1,-Z+1$    | (10) $-X+1,-Y+1,-Z+2$ |
| (11) $-X+1,-Y,-Z+2$   | (12) $X+1,Y-1,Z+1$    |
| (13) $-X+2,-Y+1,-Z+2$ | (14) $X,Y-1,Z+1$      |

## Calculation results

**Table S6.** Atom coordinates and absolute energy levels for **1** optimized in the  $S_0$  state.

E(RCAM-B3LYP) = -1476.95930873

| Center<br>Number | Atomic<br>Number | Atomic<br>Type | Coordinates (Angstroms) |           |           |
|------------------|------------------|----------------|-------------------------|-----------|-----------|
|                  |                  |                | X                       | Y         | Z         |
| 1                | 6                | 0              | -2.818228               | 5.002385  | -0.555804 |
| 2                | 6                | 0              | -3.215522               | 3.688237  | -0.410199 |
| 3                | 6                | 0              | -2.233808               | 2.690565  | -0.392110 |
| 4                | 6                | 0              | -0.862611               | 3.032169  | -0.489648 |
| 5                | 6                | 0              | -0.474651               | 4.367924  | -0.626708 |
| 6                | 6                | 0              | -1.457307               | 5.337464  | -0.666904 |
| 7                | 6                | 0              | -2.288055               | 1.256432  | -0.217024 |
| 8                | 7                | 0              | -1.049938               | 0.780305  | -0.305185 |
| 9                | 6                | 0              | -0.109112               | 1.811773  | -0.368197 |
| 10               | 5                | 0              | -0.740773               | -0.697362 | -0.018553 |
| 11               | 7                | 0              | 0.755606                | -0.777705 | 0.184555  |
| 12               | 6                | 0              | 1.665521                | 0.259114  | 0.185463  |
| 13               | 6                | 0              | 1.211056                | 1.561912  | -0.082439 |
| 14               | 6                | 0              | 1.409267                | -1.955646 | 0.141694  |
| 15               | 6                | 0              | 2.784913                | -1.703012 | 0.262409  |
| 16               | 6                | 0              | 2.958385                | -0.315507 | 0.273643  |
| 17               | 6                | 0              | -3.311770               | 0.365743  | 0.280553  |
| 18               | 6                | 0              | 0.639304                | -3.117119 | -0.268122 |
| 19               | 6                | 0              | 4.245063                | 0.396960  | 0.315959  |
| 20               | 6                | 0              | -4.688593               | 0.613303  | 0.185796  |
| 21               | 6                | 0              | -5.598181               | -0.182658 | 0.852108  |
| 22               | 6                | 0              | -5.137075               | -1.234918 | 1.649634  |
| 23               | 6                | 0              | -3.786206               | -1.507800 | 1.753808  |
| 24               | 6                | 0              | -2.855022               | -0.736006 | 1.053346  |
| 25               | 6                | 0              | -0.577634               | -2.869307 | -0.950515 |
| 26               | 6                | 0              | -1.269128               | -3.935902 | -1.523786 |
| 27               | 6                | 0              | -0.784632               | -5.228128 | -1.404304 |
| 28               | 6                | 0              | 0.401297                | -5.483433 | -0.714730 |
| 29               | 6                | 0              | 1.106811                | -4.429892 | -0.161081 |
| 30               | 6                | 0              | 5.231104                | -0.000632 | 1.225078  |
| 31               | 6                | 0              | 6.455007                | 0.651801  | 1.276501  |

|    |   |   |           |           |           |
|----|---|---|-----------|-----------|-----------|
| 32 | 6 | 0 | 6.718063  | 1.715180  | 0.419744  |
| 33 | 6 | 0 | 5.750566  | 2.114226  | -0.494694 |
| 34 | 6 | 0 | 4.527005  | 1.458926  | -0.550085 |
| 35 | 8 | 0 | -1.553987 | -1.035684 | 1.157268  |
| 36 | 8 | 0 | -1.079658 | -1.621700 | -1.089312 |
| 37 | 1 | 0 | -3.563556 | 5.789919  | -0.579057 |
| 38 | 1 | 0 | -4.265480 | 3.444531  | -0.303635 |
| 39 | 1 | 0 | 0.573251  | 4.639060  | -0.702280 |
| 40 | 1 | 0 | -1.176464 | 6.379472  | -0.780019 |
| 41 | 1 | 0 | 1.916052  | 2.384456  | -0.063540 |
| 42 | 1 | 0 | 3.572863  | -2.441147 | 0.231759  |
| 43 | 1 | 0 | -5.038092 | 1.427673  | -0.438603 |
| 44 | 1 | 0 | -6.661212 | 0.009392  | 0.760844  |
| 45 | 1 | 0 | -5.848361 | -1.856776 | 2.183862  |
| 46 | 1 | 0 | -3.415349 | -2.331288 | 2.352806  |
| 47 | 1 | 0 | -2.192259 | -3.721526 | -2.050057 |
| 48 | 1 | 0 | -1.340320 | -6.048834 | -1.846739 |
| 49 | 1 | 0 | 0.771288  | -6.498182 | -0.618351 |
| 50 | 1 | 0 | 2.038026  | -4.612502 | 0.366419  |
| 51 | 1 | 0 | 5.020308  | -0.818766 | 1.906030  |
| 52 | 1 | 0 | 7.205093  | 0.331947  | 1.992674  |
| 53 | 1 | 0 | 7.674500  | 2.225920  | 0.460685  |
| 54 | 1 | 0 | 5.953363  | 2.931777  | -1.179131 |
| 55 | 1 | 0 | 3.794739  | 1.747632  | -1.296434 |

---

**Table S7.** Atom coordinates and absolute energy levels for **2** optimized in the  $S_0$  state.

E(RCAM-B3LYP) = -1797.74818873

| Center<br>Number | Atomic<br>Number | Atomic<br>Type | Coordinates (Angstroms) |           |           |
|------------------|------------------|----------------|-------------------------|-----------|-----------|
|                  |                  |                | X                       | Y         | Z         |
| 1                | 6                | 0              | -3.137740               | 4.849419  | -0.564491 |
| 2                | 6                | 0              | -3.462200               | 3.516641  | -0.417276 |
| 3                | 6                | 0              | -2.427129               | 2.572528  | -0.398944 |
| 4                | 6                | 0              | -1.075812               | 2.989591  | -0.498698 |
| 5                | 6                | 0              | -0.762583               | 4.345873  | -0.638179 |
| 6                | 6                | 0              | -1.796323               | 5.259174  | -0.677997 |
| 7                | 6                | 0              | -2.402499               | 1.140903  | -0.221207 |
| 8                | 7                | 0              | -1.137247               | 0.734406  | -0.307604 |
| 9                | 6                | 0              | -0.257179               | 1.815186  | -0.376822 |
| 10               | 5                | 0              | -0.748253               | -0.720924 | -0.022287 |
| 11               | 7                | 0              | 0.754180                | -0.721833 | 0.179079  |
| 12               | 6                | 0              | 1.602988                | 0.369969  | 0.181221  |
| 13               | 6                | 0              | 1.078974                | 1.639759  | -0.091597 |
| 14               | 6                | 0              | 1.487753                | -1.857592 | 0.139549  |
| 15               | 6                | 0              | 2.845190                | -1.519694 | 0.282289  |
| 16               | 6                | 0              | 2.928889                | -0.126532 | 0.288183  |
| 17               | 6                | 0              | -3.374957               | 0.193882  | 0.278559  |
| 18               | 6                | 0              | 0.768886                | -3.016324 | -0.297771 |
| 19               | 6                | 0              | 4.168340                | 0.664528  | 0.344350  |
| 20               | 6                | 0              | -4.763023               | 0.364011  | 0.185529  |
| 21               | 6                | 0              | -5.626914               | -0.484079 | 0.849866  |
| 22               | 6                | 0              | -5.108298               | -1.512495 | 1.641836  |
| 23               | 6                | 0              | -3.743487               | -1.710504 | 1.742401  |
| 24               | 6                | 0              | -2.858467               | -0.883798 | 1.046387  |
| 25               | 6                | 0              | 4.396829                | 1.736075  | -0.525419 |
| 26               | 6                | 0              | 5.577179                | 2.465205  | -0.457361 |
| 27               | 6                | 0              | 6.553419                | 2.132131  | 0.474064  |
| 28               | 6                | 0              | 6.343386                | 1.060415  | 1.335044  |
| 29               | 6                | 0              | 5.162820                | 0.333549  | 1.270642  |
| 30               | 6                | 0              | -0.427239               | -2.845950 | -0.980753 |
| 31               | 6                | 0              | -0.895109               | -4.052455 | -1.579700 |
| 32               | 6                | 0              | -0.059862               | -5.097196 | -1.341004 |
| 33               | 16               | 0              | 1.316509                | -4.658782 | -0.390191 |

|    |   |   |           |           |           |
|----|---|---|-----------|-----------|-----------|
| 34 | 8 | 0 | -1.540942 | -1.112619 | 1.146859  |
| 35 | 8 | 0 | -1.051610 | -1.666802 | -1.102712 |
| 36 | 1 | 0 | -3.925022 | 5.595078  | -0.587557 |
| 37 | 1 | 0 | -4.497287 | 3.216233  | -0.309587 |
| 38 | 1 | 0 | 0.268757  | 4.674151  | -0.715773 |
| 39 | 1 | 0 | -1.573701 | 6.315007  | -0.792668 |
| 40 | 1 | 0 | 1.736349  | 2.500713  | -0.074853 |
| 41 | 1 | 0 | 3.675824  | -2.209958 | 0.266890  |
| 42 | 1 | 0 | -5.158071 | 1.160531  | -0.434694 |
| 43 | 1 | 0 | -6.698991 | -0.349744 | 0.760611  |
| 44 | 1 | 0 | -5.783230 | -2.174812 | 2.174584  |
| 45 | 1 | 0 | -3.326431 | -2.514326 | 2.337837  |
| 46 | 1 | 0 | 3.658854  | 1.974738  | -1.283647 |
| 47 | 1 | 0 | 5.739734  | 3.289217  | -1.144737 |
| 48 | 1 | 0 | 7.476041  | 2.700867  | 0.525054  |
| 49 | 1 | 0 | 7.100866  | 0.791982  | 2.064380  |
| 50 | 1 | 0 | 4.992469  | -0.491762 | 1.954218  |
| 51 | 1 | 0 | -1.814851 | -4.113774 | -2.146021 |
| 52 | 1 | 0 | -0.187305 | -6.124970 | -1.649234 |

---



**Table S8.** Atom coordinates and absolute energy levels for **3** optimized in the  $S_0$  state.

E(RCAM-B3LYP) = -1797.75150905

| Center<br>Number | Atomic<br>Number | Atomic<br>Type | Coordinates (Angstroms) |           |           |
|------------------|------------------|----------------|-------------------------|-----------|-----------|
|                  |                  |                | X                       | Y         | Z         |
| 1                | 6                | 0              | 3.170804                | -4.712021 | -0.689331 |
| 2                | 6                | 0              | 3.462388                | -3.372872 | -0.509776 |
| 3                | 6                | 0              | 2.400029                | -2.469315 | -0.439785 |
| 4                | 6                | 0              | 1.059474                | -2.908984 | -0.532426 |
| 5                | 6                | 0              | 0.779971                | -4.266615 | -0.701646 |
| 6                | 6                | 0              | 1.839815                | -5.151295 | -0.784066 |
| 7                | 6                | 0              | 2.347777                | -1.042209 | -0.214384 |
| 8                | 7                | 0              | 1.075158                | -0.645084 | -0.310007 |
| 9                | 6                | 0              | 0.213066                | -1.749373 | -0.378558 |
| 10               | 5                | 0              | 0.648164                | 0.802332  | -0.030380 |
| 11               | 7                | 0              | -0.844048               | 0.766154  | 0.178709  |
| 12               | 6                | 0              | -1.671424               | -0.336991 | 0.183090  |
| 13               | 6                | 0              | -1.116152               | -1.606743 | -0.088037 |
| 14               | 6                | 0              | -1.588487               | 1.893557  | 0.142005  |
| 15               | 6                | 0              | -2.935416               | 1.534925  | 0.267683  |
| 16               | 6                | 0              | -3.000533               | 0.134068  | 0.277404  |
| 17               | 6                | 0              | 3.255467                | -0.100349 | 0.329484  |
| 18               | 6                | 0              | -0.909832               | 3.112000  | -0.268817 |
| 19               | 6                | 0              | -4.229364               | -0.674113 | 0.323916  |
| 20               | 6                | 0              | 2.730794                | 0.947300  | 1.092568  |
| 21               | 6                | 0              | 0.323428                | 2.962318  | -0.948905 |
| 22               | 6                | 0              | 0.934020                | 4.079598  | -1.515556 |
| 23               | 6                | 0              | 0.351457                | 5.331315  | -1.395283 |
| 24               | 6                | 0              | -0.851750               | 5.491602  | -0.708504 |
| 25               | 6                | 0              | -1.475440               | 4.384766  | -0.158762 |
| 26               | 6                | 0              | -4.433234               | -1.755121 | -0.540614 |
| 27               | 6                | 0              | -5.603227               | -2.501599 | -0.481207 |
| 28               | 6                | 0              | -6.596033               | -2.176396 | 0.435379  |
| 29               | 6                | 0              | -6.411837               | -1.095146 | 1.290325  |
| 30               | 6                | 0              | -5.240766               | -0.352198 | 1.235259  |
| 31               | 8                | 0              | 1.441866                | 1.230018  | 1.157493  |
| 32               | 8                | 0              | 0.923003                | 1.755880  | -1.088271 |
| 33               | 16               | 0              | 4.976629                | -0.233055 | 0.539255  |

|    |   |   |           |           |           |
|----|---|---|-----------|-----------|-----------|
| 34 | 6 | 0 | 4.969686  | 1.102798  | 1.636558  |
| 35 | 6 | 0 | 3.734728  | 1.625537  | 1.847141  |
| 36 | 1 | 0 | 3.976373  | -5.434989 | -0.755932 |
| 37 | 1 | 0 | 4.490394  | -3.036660 | -0.428595 |
| 38 | 1 | 0 | -0.242787 | -4.621522 | -0.773036 |
| 39 | 1 | 0 | 1.641551  | -6.208923 | -0.924145 |
| 40 | 1 | 0 | -1.755813 | -2.480796 | -0.070860 |
| 41 | 1 | 0 | -3.779622 | 2.208241  | 0.239743  |
| 42 | 1 | 0 | 1.871885  | 3.937601  | -2.040477 |
| 43 | 1 | 0 | 0.843255  | 6.193304  | -1.834806 |
| 44 | 1 | 0 | -1.299835 | 6.474277  | -0.610406 |
| 45 | 1 | 0 | -2.418926 | 4.494087  | 0.367197  |
| 46 | 1 | 0 | -3.683331 | -1.987989 | -1.288978 |
| 47 | 1 | 0 | -5.745148 | -3.332850 | -1.164568 |
| 48 | 1 | 0 | -7.510921 | -2.758128 | 0.479269  |
| 49 | 1 | 0 | -7.182215 | -0.832026 | 2.008133  |
| 50 | 1 | 0 | -5.090997 | 0.480326  | 1.914984  |
| 51 | 1 | 0 | 5.906068  | 1.450411  | 2.049545  |
| 52 | 1 | 0 | 3.520000  | 2.467508  | 2.491121  |

---

**Table S9.** Atom coordinates and absolute energy levels for **4** optimized in the  $S_0$  state.

E(RCAM-B3LYP) = -2118.53992626

| Center<br>Number | Atomic<br>Number | Atomic<br>Type | Coordinates (Angstroms) |           |           |
|------------------|------------------|----------------|-------------------------|-----------|-----------|
|                  |                  |                | X                       | Y         | Z         |
| 1                | 6                | 0              | 3.455395                | -4.551695 | -0.693384 |
| 2                | 6                | 0              | 3.678158                | -3.200622 | -0.511947 |
| 3                | 6                | 0              | 2.570855                | -2.350630 | -0.444570 |
| 4                | 6                | 0              | 1.253733                | -2.858243 | -0.541961 |
| 5                | 6                | 0              | 1.044723                | -4.229389 | -0.713724 |
| 6                | 6                | 0              | 2.147692                | -5.058315 | -0.793232 |
| 7                | 6                | 0              | 2.446085                | -0.931033 | -0.217620 |
| 8                | 7                | 0              | 1.153198                | -0.599700 | -0.312784 |
| 9                | 6                | 0              | 0.350464                | -1.745528 | -0.388998 |
| 10               | 5                | 0              | 0.654143                | 0.822903  | -0.035705 |
| 11               | 7                | 0              | -0.839385               | 0.712325  | 0.170926  |
| 12               | 6                | 0              | -1.605691               | -0.438263 | 0.177681  |
| 13               | 6                | 0              | -0.987640               | -1.672084 | -0.098487 |
| 14               | 6                | 0              | -1.656916               | 1.793715  | 0.137120  |
| 15               | 6                | 0              | -2.980152               | 1.356817  | 0.284018  |
| 16               | 6                | 0              | -2.959838               | -0.043178 | 0.289810  |
| 17               | 6                | 0              | 3.303541                | 0.057292  | 0.329698  |
| 18               | 6                | 0              | -1.023226               | 3.003138  | -0.303230 |
| 19               | 6                | 0              | -4.138482               | -0.922189 | 0.351131  |
| 20               | 6                | 0              | 0.183276                | 2.925127  | -0.980386 |
| 21               | 6                | 0              | 2.726496                | 1.080769  | 1.084494  |
| 22               | 6                | 0              | -4.292516               | -2.008806 | -0.516478 |
| 23               | 6                | 0              | -5.416319               | -2.821991 | -0.443151 |
| 24               | 6                | 0              | -6.411319               | -2.559409 | 0.490973  |
| 25               | 6                | 0              | -6.276609               | -1.473606 | 1.349361  |
| 26               | 6                | 0              | -5.151845               | -0.663379 | 1.280078  |
| 27               | 8                | 0              | 1.422427                | 1.298506  | 1.144958  |
| 28               | 8                | 0              | 0.895152                | 1.792645  | -1.103728 |
| 29               | 6                | 0              | 0.569419                | 4.166579  | -1.565516 |
| 30               | 6                | 0              | -0.338787               | 5.148157  | -1.324143 |
| 31               | 16               | 0              | -1.684394               | 4.603683  | -0.384230 |
| 32               | 16               | 0              | 5.029054                | 0.017006  | 0.538094  |
| 33               | 6                | 0              | 4.954089                | 1.358885  | 1.625230  |

|    |   |   |           |           |           |
|----|---|---|-----------|-----------|-----------|
| 34 | 6 | 0 | 3.693069  | 1.817955  | 1.831706  |
| 35 | 1 | 0 | 4.296596  | -5.233122 | -0.757839 |
| 36 | 1 | 0 | 4.687625  | -2.812893 | -0.427238 |
| 37 | 1 | 0 | 0.041566  | -4.635813 | -0.789122 |
| 38 | 1 | 0 | 2.004229  | -6.124564 | -0.934938 |
| 39 | 1 | 0 | -1.580679 | -2.578348 | -0.083201 |
| 40 | 1 | 0 | -3.860927 | 1.981979  | 0.270455  |
| 41 | 1 | 0 | -3.542052 | -2.194197 | -1.277376 |
| 42 | 1 | 0 | -5.520803 | -3.656723 | -1.128969 |
| 43 | 1 | 0 | -7.290089 | -3.193519 | 0.545881  |
| 44 | 1 | 0 | -7.049340 | -1.259253 | 2.080681  |
| 45 | 1 | 0 | -5.039849 | 0.173429  | 1.961777  |
| 46 | 1 | 0 | 1.484725  | 4.296705  | -2.127532 |
| 47 | 1 | 0 | -0.285095 | 6.184160  | -1.625826 |
| 48 | 1 | 0 | 5.871094  | 1.756741  | 2.036176  |
| 49 | 1 | 0 | 3.434451  | 2.651859  | 2.470104  |

---

**Table S10.** Atom coordinates and absolute energy levels for **5** optimized in the  $S_0$  state.

E(RCAM-B3LYP) = -1527.42997880

| Center<br>Number | Atomic<br>Number | Atomic<br>Type | Coordinates (Angstroms) |           |           |
|------------------|------------------|----------------|-------------------------|-----------|-----------|
|                  |                  |                | X                       | Y         | Z         |
| 1                | 6                | 0              | 3.587185                | -4.535103 | -0.061715 |
| 2                | 6                | 0              | 3.791529                | -3.171729 | -0.082834 |
| 3                | 6                | 0              | 2.668979                | -2.332184 | -0.047625 |
| 4                | 6                | 0              | 1.366640                | -2.869716 | -0.020826 |
| 5                | 6                | 0              | 1.171168                | -4.255274 | 0.000973  |
| 6                | 6                | 0              | 2.284709                | -5.070350 | -0.014777 |
| 7                | 6                | 0              | 2.534229                | -0.899150 | -0.075511 |
| 8                | 7                | 0              | 1.239962                | -0.584486 | -0.087144 |
| 9                | 6                | 0              | 0.470323                | -1.753025 | -0.034550 |
| 10               | 5                | 0              | 0.611056                | 0.873194  | 0.023422  |
| 11               | 7                | 0              | -0.939143               | 0.723017  | 0.080699  |
| 12               | 6                | 0              | -1.602354               | -0.493642 | 0.054060  |
| 13               | 6                | 0              | -0.894253               | -1.697719 | 0.038297  |
| 14               | 6                | 0              | -1.877661               | 1.705663  | 0.077120  |
| 15               | 6                | 0              | -3.150949               | 1.118495  | 0.073555  |
| 16               | 6                | 0              | -2.994925               | -0.263398 | 0.051742  |
| 17               | 6                | 0              | 3.661790                | 0.046139  | -0.064065 |
| 18               | 6                | 0              | -1.632485               | 3.157602  | 0.042107  |
| 19               | 6                | 0              | -4.063704               | -1.272991 | 0.035137  |
| 20               | 6                | 0              | 4.688964                | -0.158329 | 0.865284  |
| 21               | 6                | 0              | 5.797126                | 0.676100  | 0.886184  |
| 22               | 6                | 0              | 5.901923                | 1.715015  | -0.031480 |
| 23               | 6                | 0              | 4.889372                | 1.919242  | -0.961516 |
| 24               | 6                | 0              | 3.772614                | 1.095380  | -0.980932 |
| 25               | 6                | 0              | -0.620093               | 3.785782  | 0.773918  |
| 26               | 6                | 0              | -0.484500               | 5.167076  | 0.736317  |
| 27               | 6                | 0              | -1.350001               | 5.944266  | -0.023866 |
| 28               | 6                | 0              | -2.360289               | 5.329289  | -0.754469 |
| 29               | 6                | 0              | -2.500771               | 3.949935  | -0.719671 |
| 30               | 6                | 0              | -5.171277               | -1.131808 | 0.878361  |
| 31               | 6                | 0              | -6.194943               | -2.068611 | 0.868957  |
| 32               | 6                | 0              | -6.132559               | -3.165783 | 0.016237  |
| 33               | 6                | 0              | -5.042567               | -3.313328 | -0.832968 |

|    |   |   |           |           |           |
|----|---|---|-----------|-----------|-----------|
| 34 | 6 | 0 | -4.019249 | -2.373625 | -0.827761 |
| 35 | 9 | 0 | 0.944244  | 1.617275  | -1.089005 |
| 36 | 9 | 0 | 1.114045  | 1.416940  | 1.191371  |
| 37 | 1 | 0 | 4.436895  | -5.208668 | -0.087186 |
| 38 | 1 | 0 | 4.792190  | -2.757642 | -0.132336 |
| 39 | 1 | 0 | 0.173653  | -4.681612 | 0.025841  |
| 40 | 1 | 0 | 2.157822  | -6.147982 | 0.001358  |
| 41 | 1 | 0 | -1.454484 | -2.624279 | 0.086682  |
| 42 | 1 | 0 | -4.084582 | 1.661293  | 0.079838  |
| 43 | 1 | 0 | 4.601767  | -0.960159 | 1.590385  |
| 44 | 1 | 0 | 6.577883  | 0.515721  | 1.622272  |
| 45 | 1 | 0 | 6.770233  | 2.365775  | -0.019839 |
| 46 | 1 | 0 | 4.965894  | 2.729058  | -1.679367 |
| 47 | 1 | 0 | 2.978458  | 1.267715  | -1.693274 |
| 48 | 1 | 0 | 0.058661  | 3.190890  | 1.368697  |
| 49 | 1 | 0 | 0.305391  | 5.638887  | 1.311809  |
| 50 | 1 | 0 | -1.237256 | 7.023388  | -0.048884 |
| 51 | 1 | 0 | -3.037975 | 5.923993  | -1.358463 |
| 52 | 1 | 0 | -3.278480 | 3.472735  | -1.306234 |
| 53 | 1 | 0 | -5.213081 | -0.285884 | 1.556639  |
| 54 | 1 | 0 | -7.043237 | -1.944704 | 1.534413  |
| 55 | 1 | 0 | -6.932824 | -3.898477 | 0.009847  |
| 56 | 1 | 0 | -4.993522 | -4.157081 | -1.513852 |
| 57 | 1 | 0 | -3.192840 | -2.471892 | -1.523719 |

---
